# Supplementary material for: Anti-inflammatory butenolide derivatives from the coral-derived fungus Aspergillus terreus and structure revisions of aspernolides D and G, butyrolactone VI and 4′,8′′-diacetoxy butyrolactone VI
Source: Royal Society of Chemistry journal article supplement (doi:10.1039/c8ra01840e), 2018-01-01
Supplement: c8ra01840e1.pdf [file c8ra01840e1.pdf]

# **Anti-inflammatory butenolide derivatives from the coral-derived fungus *Aspergillus terreus* and structure revisions of aspernolides D and G, butyrolactone VI and 4',8''-diacetoxy butyrolactone VI**

Mengting Liu,<sup>a,†</sup> Qun Zhou,<sup>a,†</sup> Jianping Wang,<sup>a,†</sup> Junjun Liu,<sup>a</sup> Changxing Qi,<sup>a</sup> Yongji Lai,<sup>b</sup> Hucheng Zhu,<sup>a</sup> Yongbo Xue,<sup>a</sup> Zhengxi Hu,<sup>a,\*</sup> and Yonghui Zhang<sup>a,\*</sup>

<sup>a</sup>*Hubei Key Laboratory of Natural Medicinal Chemistry and Resource Evaluation, School of Pharmacy, Tongji Medical College, Huazhong University of Science and Technology, Wuhan 430030, Hubei Province, People's Republic of China*

<sup>b</sup>*Department of Pharmacy, the Central Hospital of Wuhan, Wuhan 430014, Hubei Province, People's Republic of China*

---

\* Corresponding author Tel.: +86 027 83692892.

E-mail addresses: zhangyh@mails.tjmu.edu.cn (Y. Zhang); hzx616@126.com (Z. Hu).

## CONTENTS

|                                                                                                                        |    |
|------------------------------------------------------------------------------------------------------------------------|----|
| <b>Figure S1.</b> $^1\text{H}$ NMR spectrum of compound <b>1</b> (Recorded in $\text{CDCl}_3$ ) .....                  | 1  |
| <b>Figure S2.</b> $^{13}\text{C}$ NMR spectrum of compound <b>1</b> (Recorded in $\text{CDCl}_3$ ) .....               | 2  |
| <b>Figure S3.</b> DEPT spectrum of compound <b>1</b> (Recorded in $\text{CDCl}_3$ ) .....                              | 3  |
| <b>Figure S4.</b> HSQC spectrum of compound <b>1</b> (Recorded in $\text{CDCl}_3$ ) .....                              | 4  |
| <b>Figure S5.</b> HMBC spectrum of compound <b>1</b> (Recorded in $\text{CDCl}_3$ ) .....                              | 5  |
| <b>Figure S6.</b> $^1\text{H}$ - $^1\text{H}$ COSY spectrum of compound <b>1</b> (Recorded in $\text{CDCl}_3$ ) .....  | 6  |
| <b>Figure S7.</b> NOESY spectrum of compound <b>1</b> (Recorded in $\text{CDCl}_3$ ) .....                             | 7  |
| <b>Figure S8.</b> HRESIMS spectrum of compound <b>1</b> .....                                                          | 8  |
| <b>Figure S9.</b> UV spectrum of compound <b>1</b> .....                                                               | 9  |
| <b>Figure S10.</b> IR spectrum of compound <b>1</b> .....                                                              | 10 |
| <b>Figure S11.</b> $^1\text{H}$ NMR spectrum of compound <b>2</b> (Recorded in $\text{CDCl}_3$ ) .....                 | 11 |
| <b>Figure S12.</b> $^{13}\text{C}$ NMR spectrum of compound <b>2</b> (Recorded in $\text{CDCl}_3$ ) .....              | 12 |
| <b>Figure S13.</b> DEPT spectrum of compound <b>2</b> (Recorded in $\text{CDCl}_3$ ) .....                             | 13 |
| <b>Figure S14.</b> HSQC spectrum of compound <b>2</b> (Recorded in $\text{CDCl}_3$ ) .....                             | 14 |
| <b>Figure S15.</b> HMBC spectrum of compound <b>2</b> (Recorded in $\text{CDCl}_3$ ) .....                             | 15 |
| <b>Figure S16.</b> $^1\text{H}$ - $^1\text{H}$ COSY spectrum of compound <b>2</b> (Recorded in $\text{CDCl}_3$ ) ..... | 16 |
| <b>Figure S17.</b> NOESY spectrum of compound <b>2</b> (Recorded in $\text{CDCl}_3$ ) .....                            | 17 |
| <b>Figure S18.</b> HRESIMS spectrum of compound <b>2</b> .....                                                         | 18 |
| <b>Figure S19.</b> UV spectrum of compound <b>2</b> .....                                                              | 19 |
| <b>Figure S20.</b> IR spectrum of compound <b>2</b> .....                                                              | 20 |
| <b>Figure S21.</b> $^1\text{H}$ NMR spectrum of compound <b>3</b> (Recorded in methanol- $d_4$ ) .....                 | 21 |
| <b>Figure S22.</b> $^{13}\text{C}$ NMR spectrum of compound <b>3</b> (Recorded in methanol- $d_4$ ) .....              | 22 |
| <b>Figure S23.</b> DEPT spectrum of compound <b>3</b> (Recorded in methanol- $d_4$ ) .....                             | 23 |
| <b>Figure S24.</b> HSQC spectrum of compound <b>3</b> (Recorded in methanol- $d_4$ ) .....                             | 24 |

|                                                                                                                                          |    |
|------------------------------------------------------------------------------------------------------------------------------------------|----|
| <b>Figure S25.</b> HMBC spectrum of compound <b>3</b> (Recorded in methanol- <i>d</i> <sub>4</sub> ).....                                | 25 |
| <b>Figure S26.</b> <sup>1</sup> H- <sup>1</sup> H COSY spectrum of compound <b>3</b> (Recorded in methanol- <i>d</i> <sub>4</sub> )..... | 26 |
| <b>Figure S27.</b> NOESY spectrum of compound <b>3</b> (Recorded in methanol- <i>d</i> <sub>4</sub> ) .....                              | 27 |
| <b>Figure S28.</b> HRESIMS spectrum of compound <b>3</b> .....                                                                           | 28 |
| <b>Figure S29.</b> UV spectrum of compound <b>3</b> .....                                                                                | 29 |
| <b>Figure S30.</b> IR spectrum of compound <b>3</b> .....                                                                                | 30 |
| <b>Figure S31.</b> <sup>1</sup> H NMR spectrum of compound <b>4</b> (Recorded in methanol- <i>d</i> <sub>4</sub> ) .....                 | 31 |
| <b>Figure S32.</b> <sup>13</sup> C NMR spectrum of compound <b>4</b> (Recorded in methanol- <i>d</i> <sub>4</sub> ) .....                | 32 |
| <b>Figure S33.</b> DEPT spectrum of compound <b>4</b> (Recorded in methanol- <i>d</i> <sub>4</sub> ).....                                | 33 |
| <b>Figure S34.</b> HSQC spectrum of compound <b>4</b> (Recorded in methanol- <i>d</i> <sub>4</sub> ).....                                | 34 |
| <b>Figure S35.</b> HMBC spectrum of compound <b>4</b> (Recorded in methanol- <i>d</i> <sub>4</sub> ).....                                | 35 |
| <b>Figure S36.</b> <sup>1</sup> H- <sup>1</sup> H COSY spectrum of compound <b>4</b> (Recorded in methanol- <i>d</i> <sub>4</sub> )..... | 36 |
| <b>Figure S37.</b> NOESY spectrum of compound <b>4</b> (Recorded in methanol- <i>d</i> <sub>4</sub> ) .....                              | 37 |
| <b>Figure S38.</b> HRESIMS spectrum of compound <b>4</b> .....                                                                           | 38 |
| <b>Figure S39.</b> UV spectrum of compound <b>4</b> .....                                                                                | 39 |
| <b>Figure S40.</b> IR spectrum of compound <b>4</b> .....                                                                                | 40 |
| <b>Figure S41.</b> <sup>1</sup> H NMR spectrum of compound <b>5</b> (Recorded in methanol- <i>d</i> <sub>4</sub> ) .....                 | 41 |
| <b>Figure S42.</b> <sup>13</sup> C NMR spectrum of compound <b>5</b> (Recorded in methanol- <i>d</i> <sub>4</sub> ) .....                | 42 |
| <b>Figure S43.</b> DEPT spectrum of compound <b>5</b> (Recorded in methanol- <i>d</i> <sub>4</sub> ).....                                | 43 |
| <b>Figure S44.</b> HRESIMS spectrum of compound <b>5</b> .....                                                                           | 44 |
| <b>Figure S45.</b> <sup>1</sup> H NMR spectrum of compound <b>7</b> (Recorded in methanol- <i>d</i> <sub>4</sub> ) .....                 | 45 |
| <b>Figure S46.</b> <sup>13</sup> C NMR spectrum of compound <b>7</b> (Recorded in methanol- <i>d</i> <sub>4</sub> ) .....                | 46 |
| <b>Figure S47.</b> DEPT spectrum of compound <b>7</b> (Recorded in methanol- <i>d</i> <sub>4</sub> ).....                                | 47 |
| <b>Figure S48.</b> HRESIMS spectrum of compound <b>7</b> .....                                                                           | 48 |
| <b>Figure S49.</b> <sup>13</sup> C NMR prediction at C-7'' for compound <b>1</b> by ACD/Labs software .....                              | 49 |
| <b>Figure S50.</b> <sup>13</sup> C NMR prediction at C-8'' for compound <b>1</b> by ACD/Labs software .....                              | 50 |

|                                                                                                             |    |
|-------------------------------------------------------------------------------------------------------------|----|
| <b>Figure S51.</b> $^{13}\text{C}$ NMR prediction at C-9'' for compound <b>1</b> by ACD/Labs software ..... | 51 |
| <b>Figure S52.</b> $^{13}\text{C}$ NMR prediction at C-7'' for compound <b>5</b> by ACD/Labs software ..... | 52 |
| <b>Figure S53.</b> $^{13}\text{C}$ NMR prediction at C-8'' for compound <b>5</b> by ACD/Labs software ..... | 53 |
| <b>Figure S54.</b> $^{13}\text{C}$ NMR prediction at C-9'' for compound <b>5</b> by ACD/Labs software ..... | 54 |
| <b>Figure S55.</b> $^{13}\text{C}$ NMR prediction at C-7'' for compound <b>7</b> by ACD/Labs software ..... | 55 |
| <b>Figure S56.</b> $^{13}\text{C}$ NMR prediction at C-8'' for compound <b>7</b> by ACD/Labs software ..... | 56 |
| <b>Figure S57.</b> $^{13}\text{C}$ NMR prediction at C-9'' for compound <b>7</b> by ACD/Labs software ..... | 57 |
| <b><math>^{13}\text{C}</math> NMR calculation data</b> .....                                                | 58 |

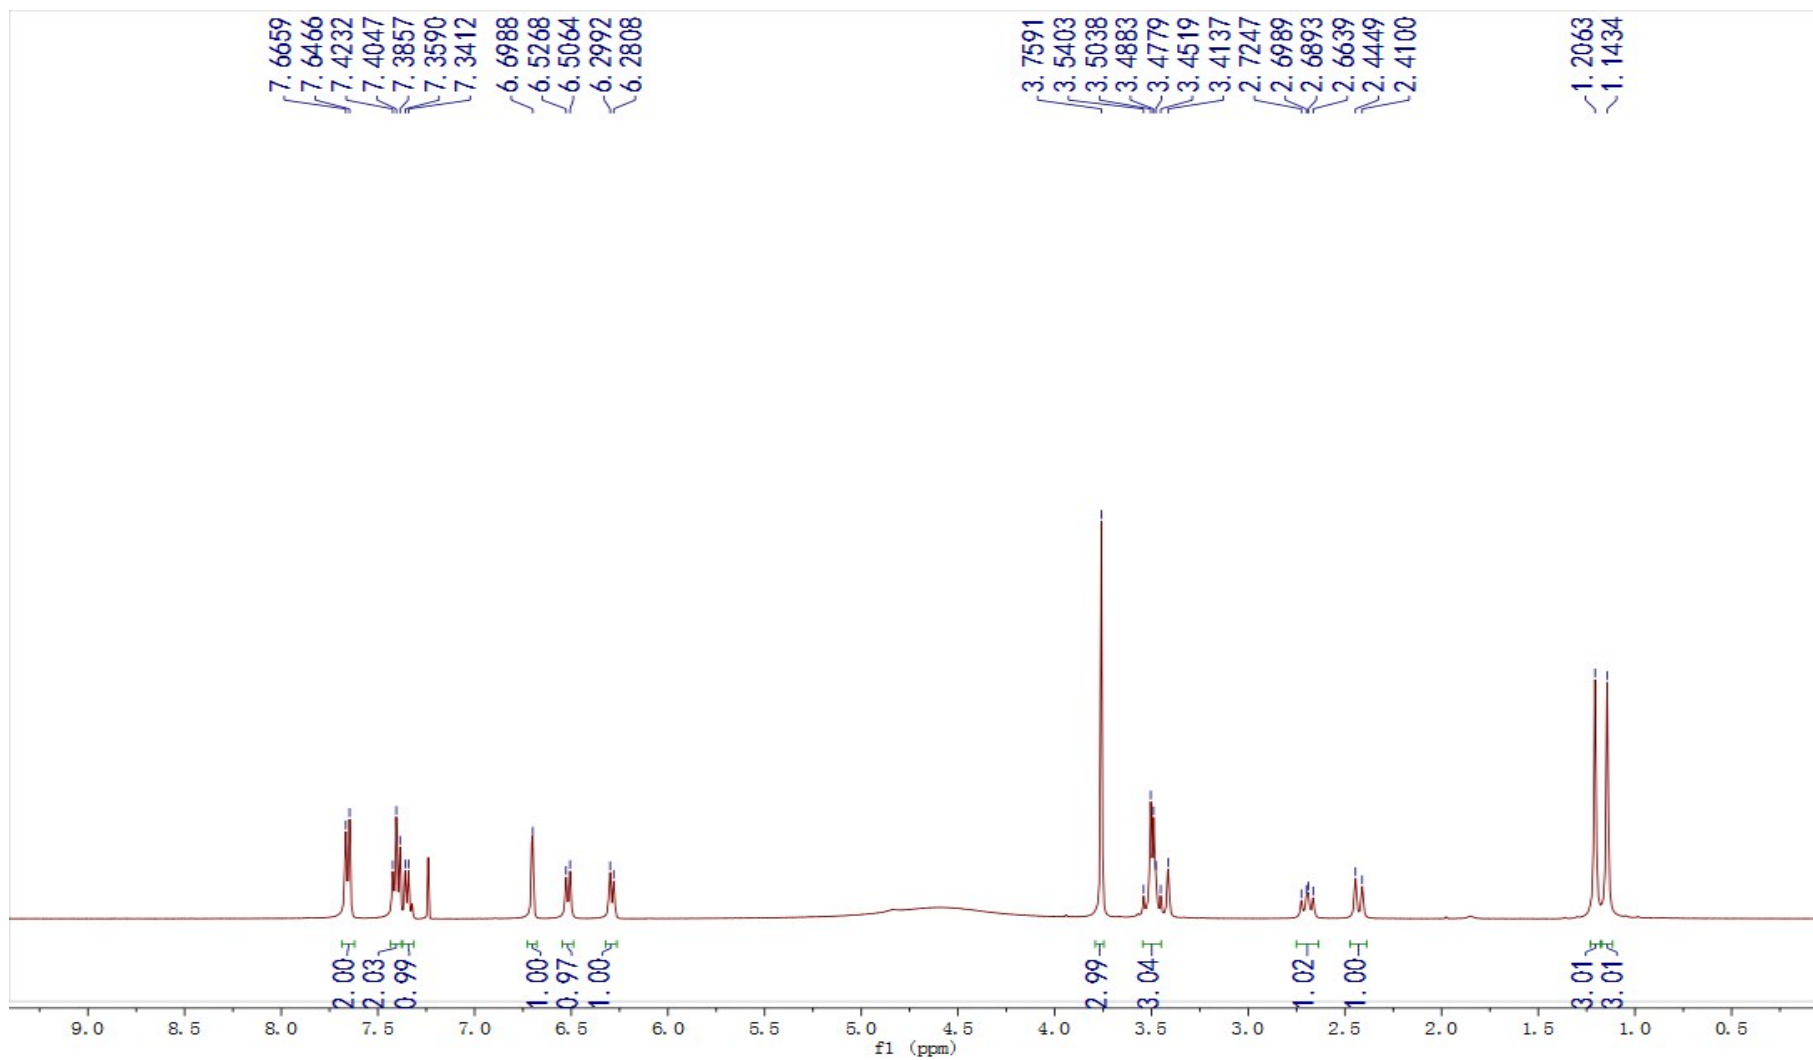

**Figure S1.**  $^1\text{H}$  NMR spectrum of compound **1** (Recorded in  $\text{CDCl}_3$ )

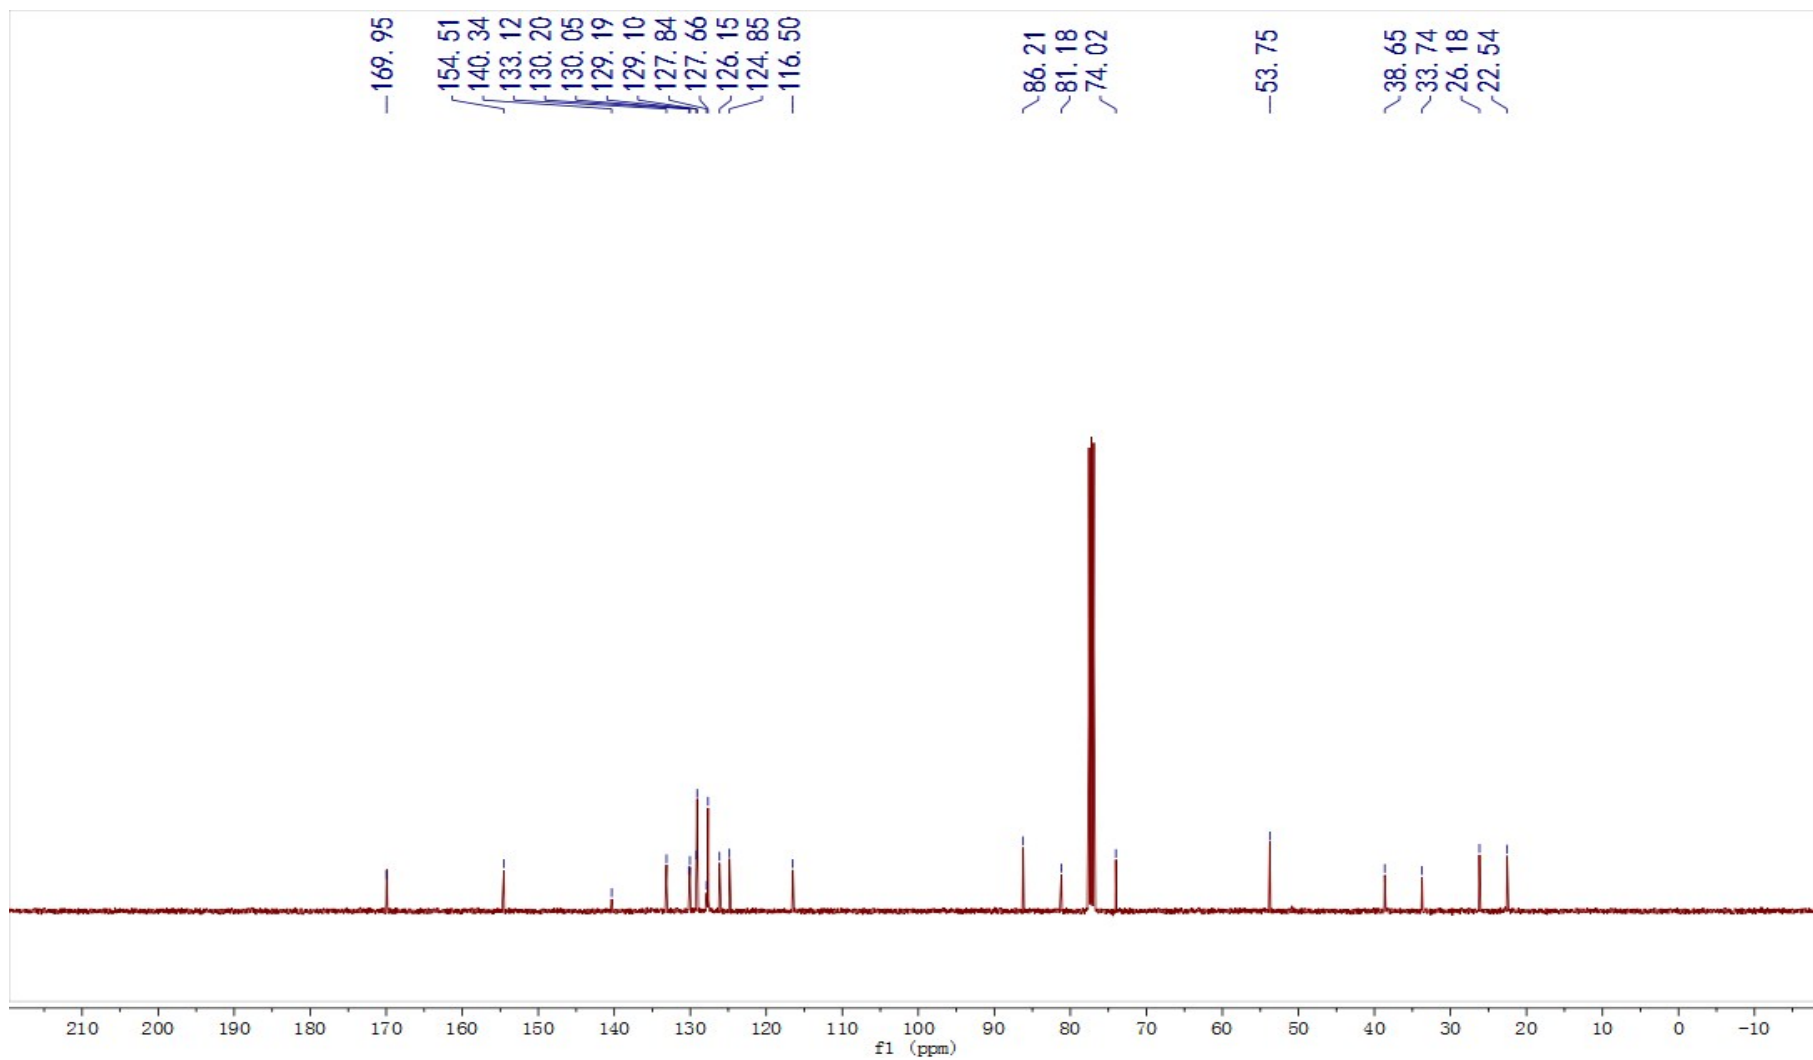

**Figure S2.**  $^{13}\text{C}$  NMR spectrum of compound **1** (Recorded in  $\text{CDCl}_3$ )

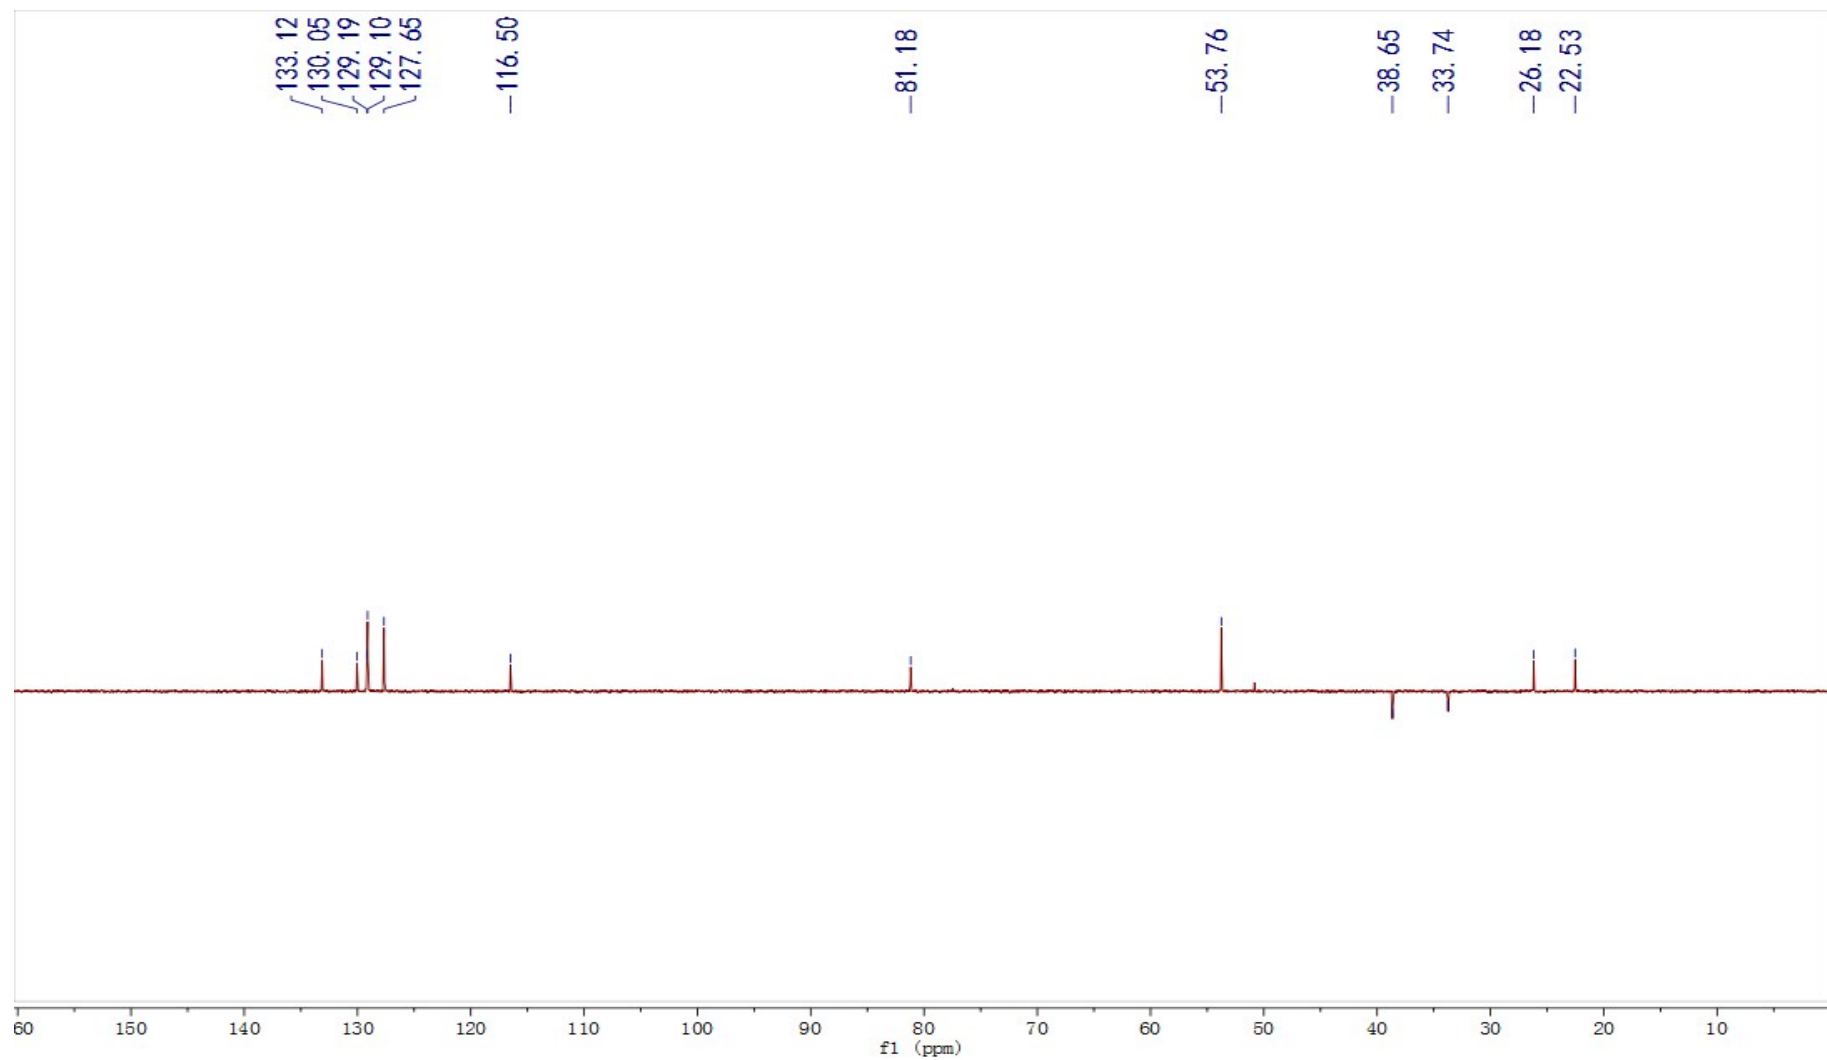

**Figure S3.** DEPT spectrum of compound **1** (Recorded in CDCl<sub>3</sub>)

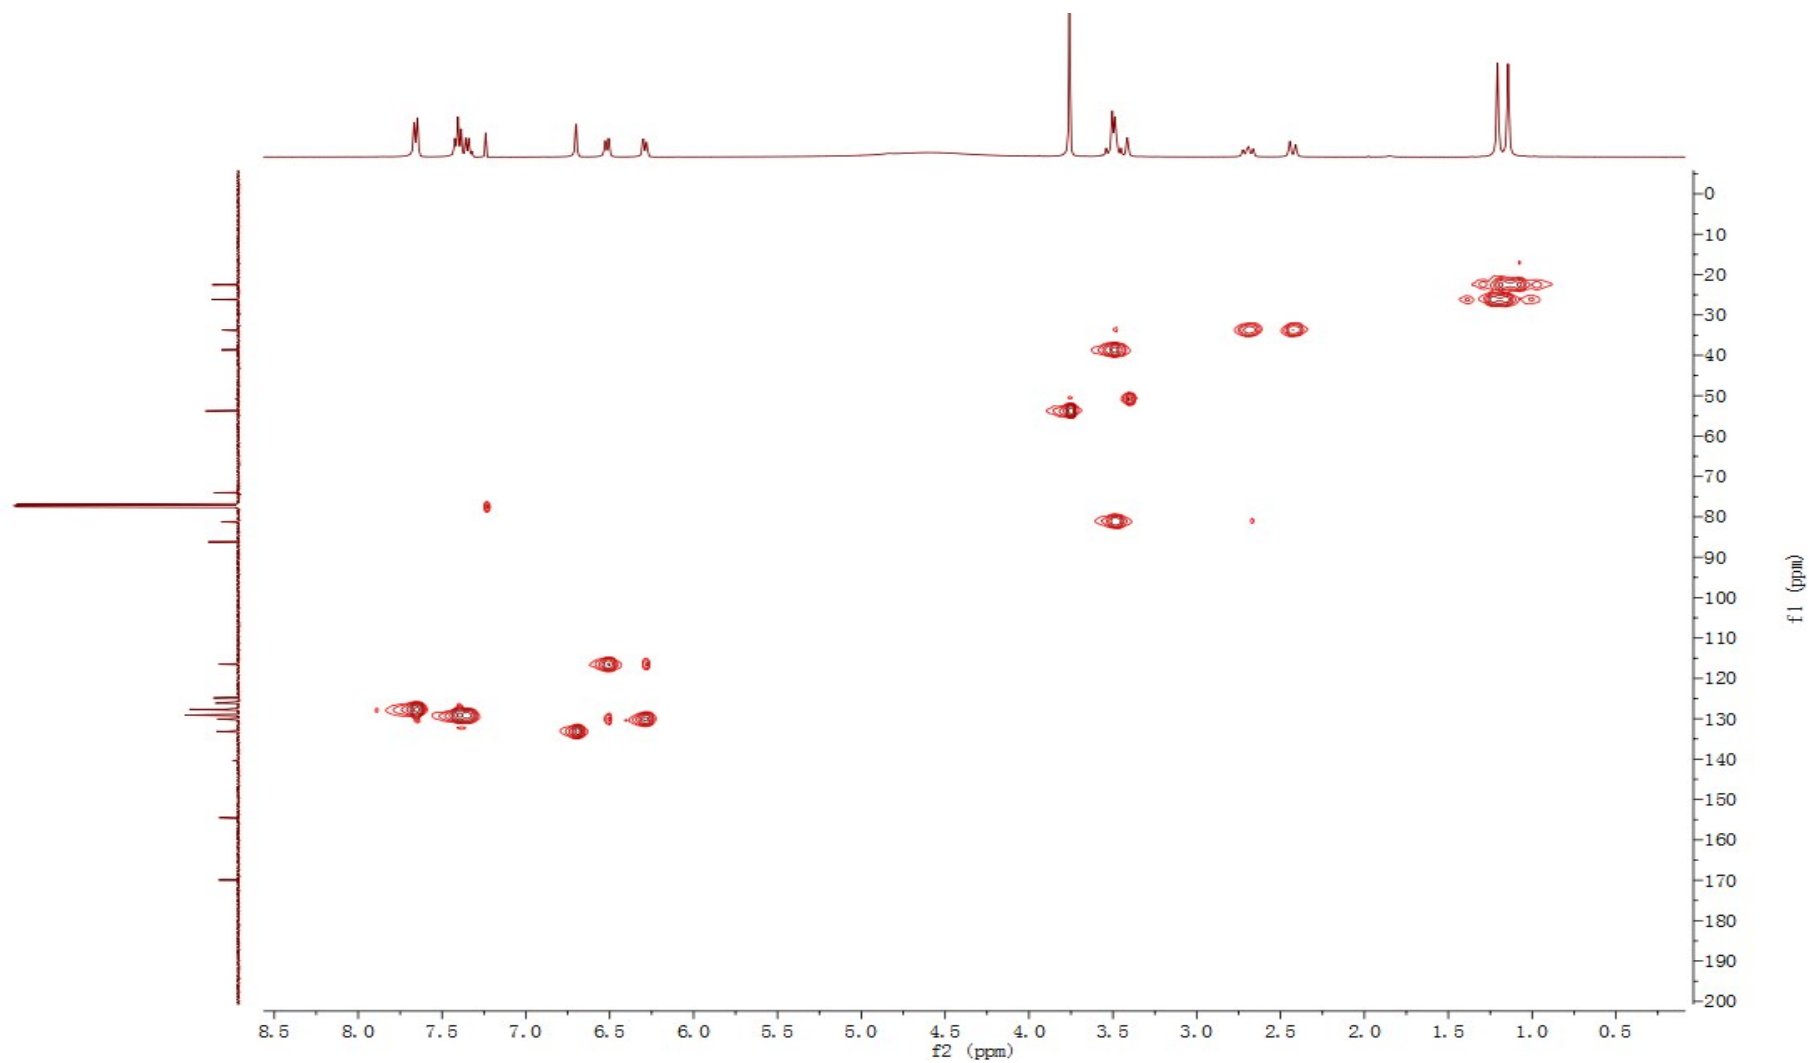

**Figure S4.** HSQC spectrum of compound **1** (Recorded in CDCl<sub>3</sub>)



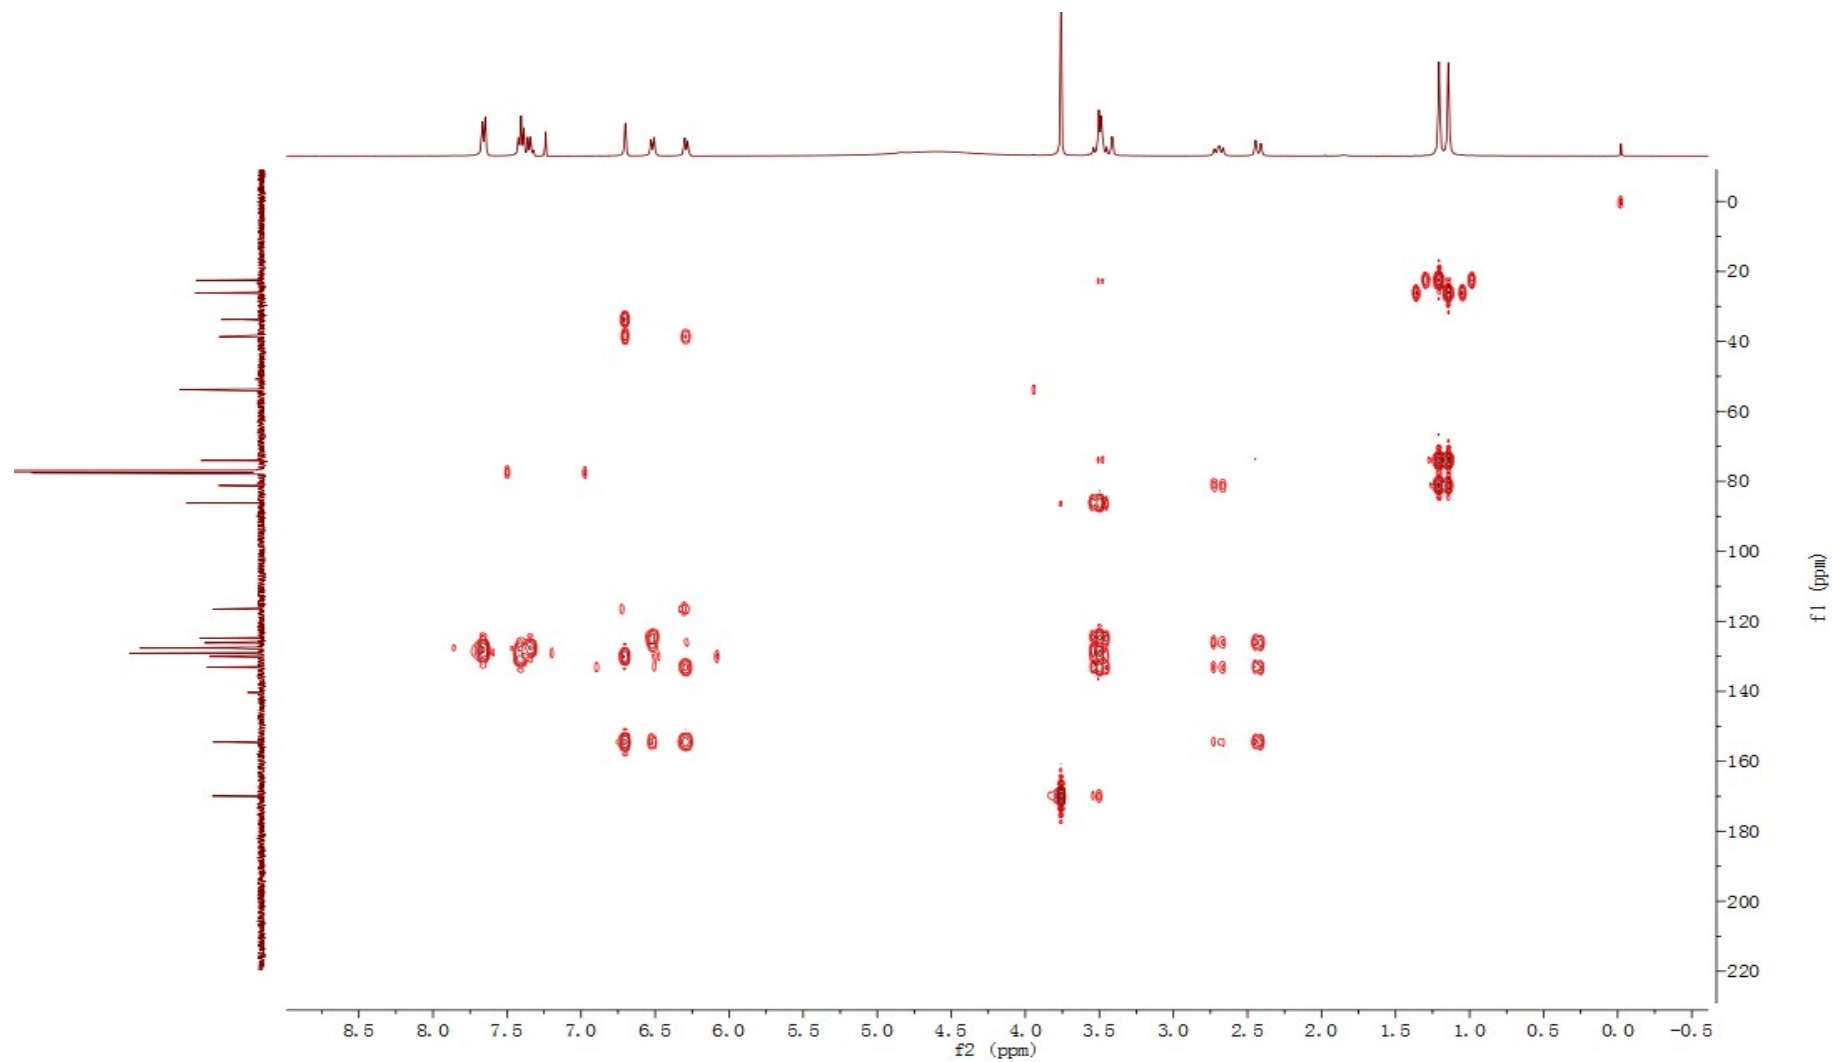

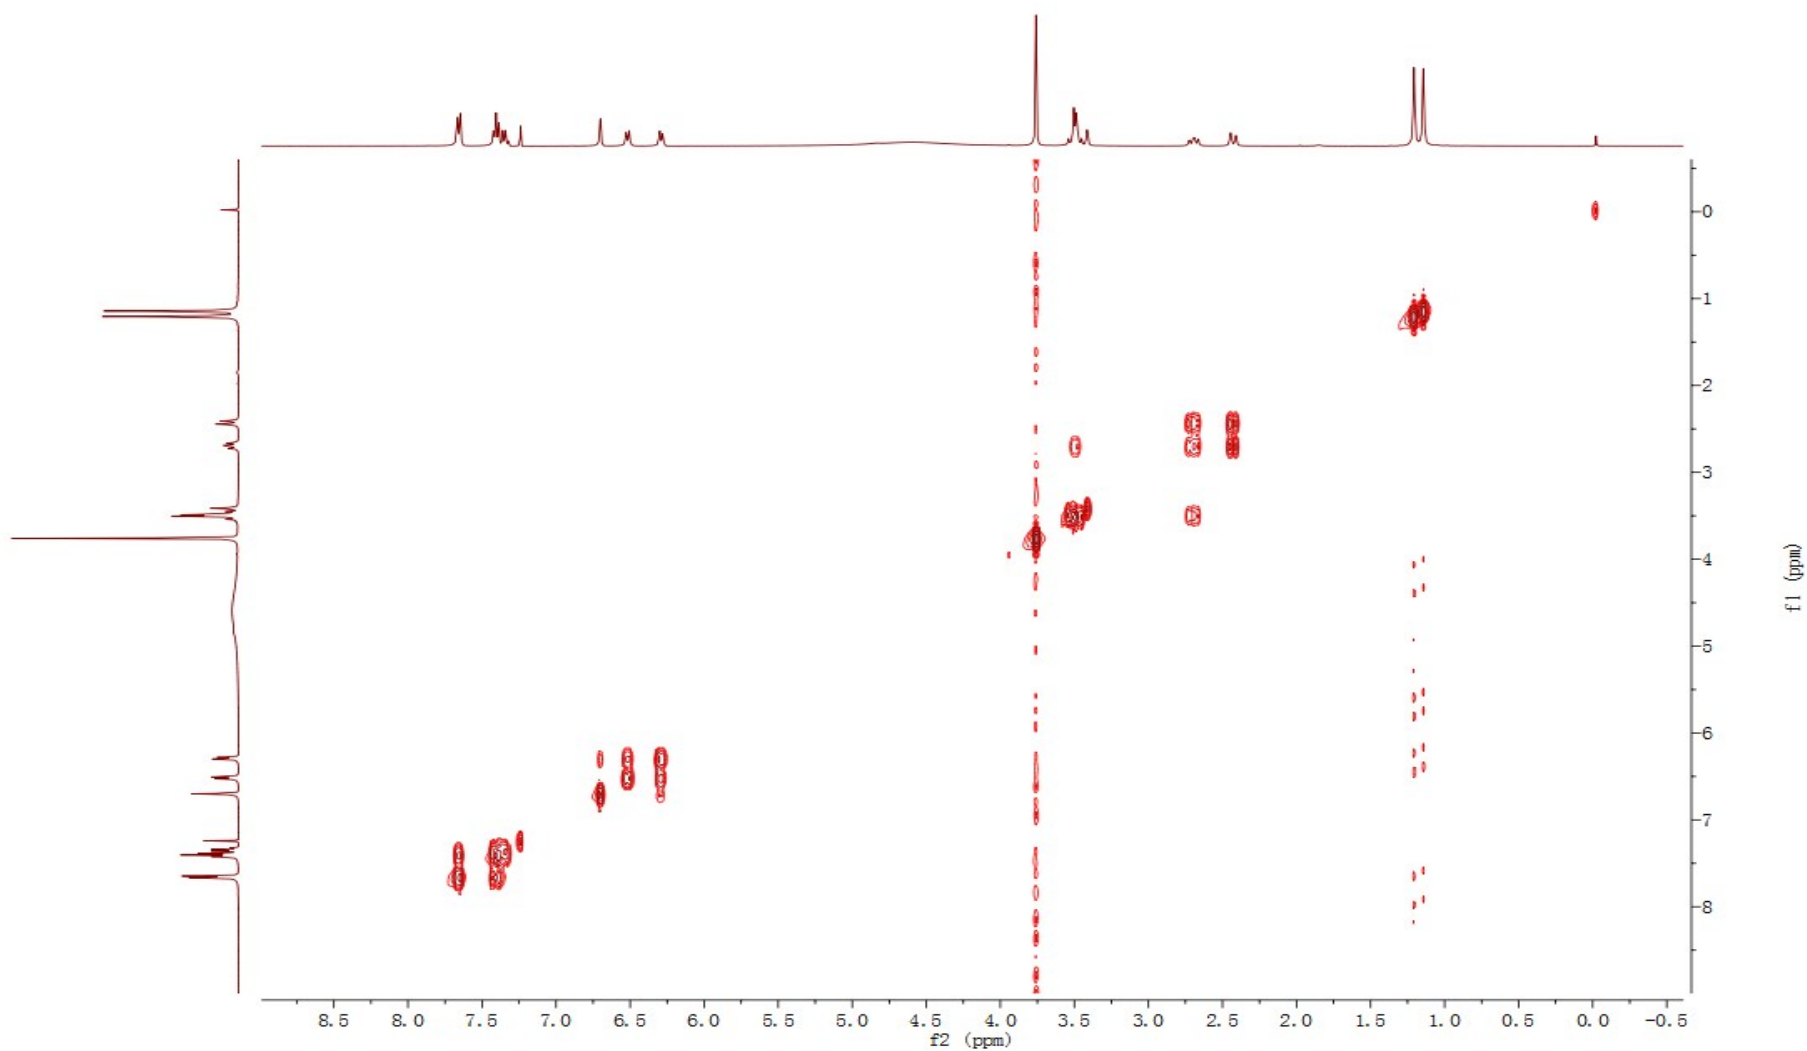

**Figure S6.**  $^1\text{H}$ - $^1\text{H}$  COSY spectrum of compound **1** (Recorded in  $\text{CDCl}_3$ )

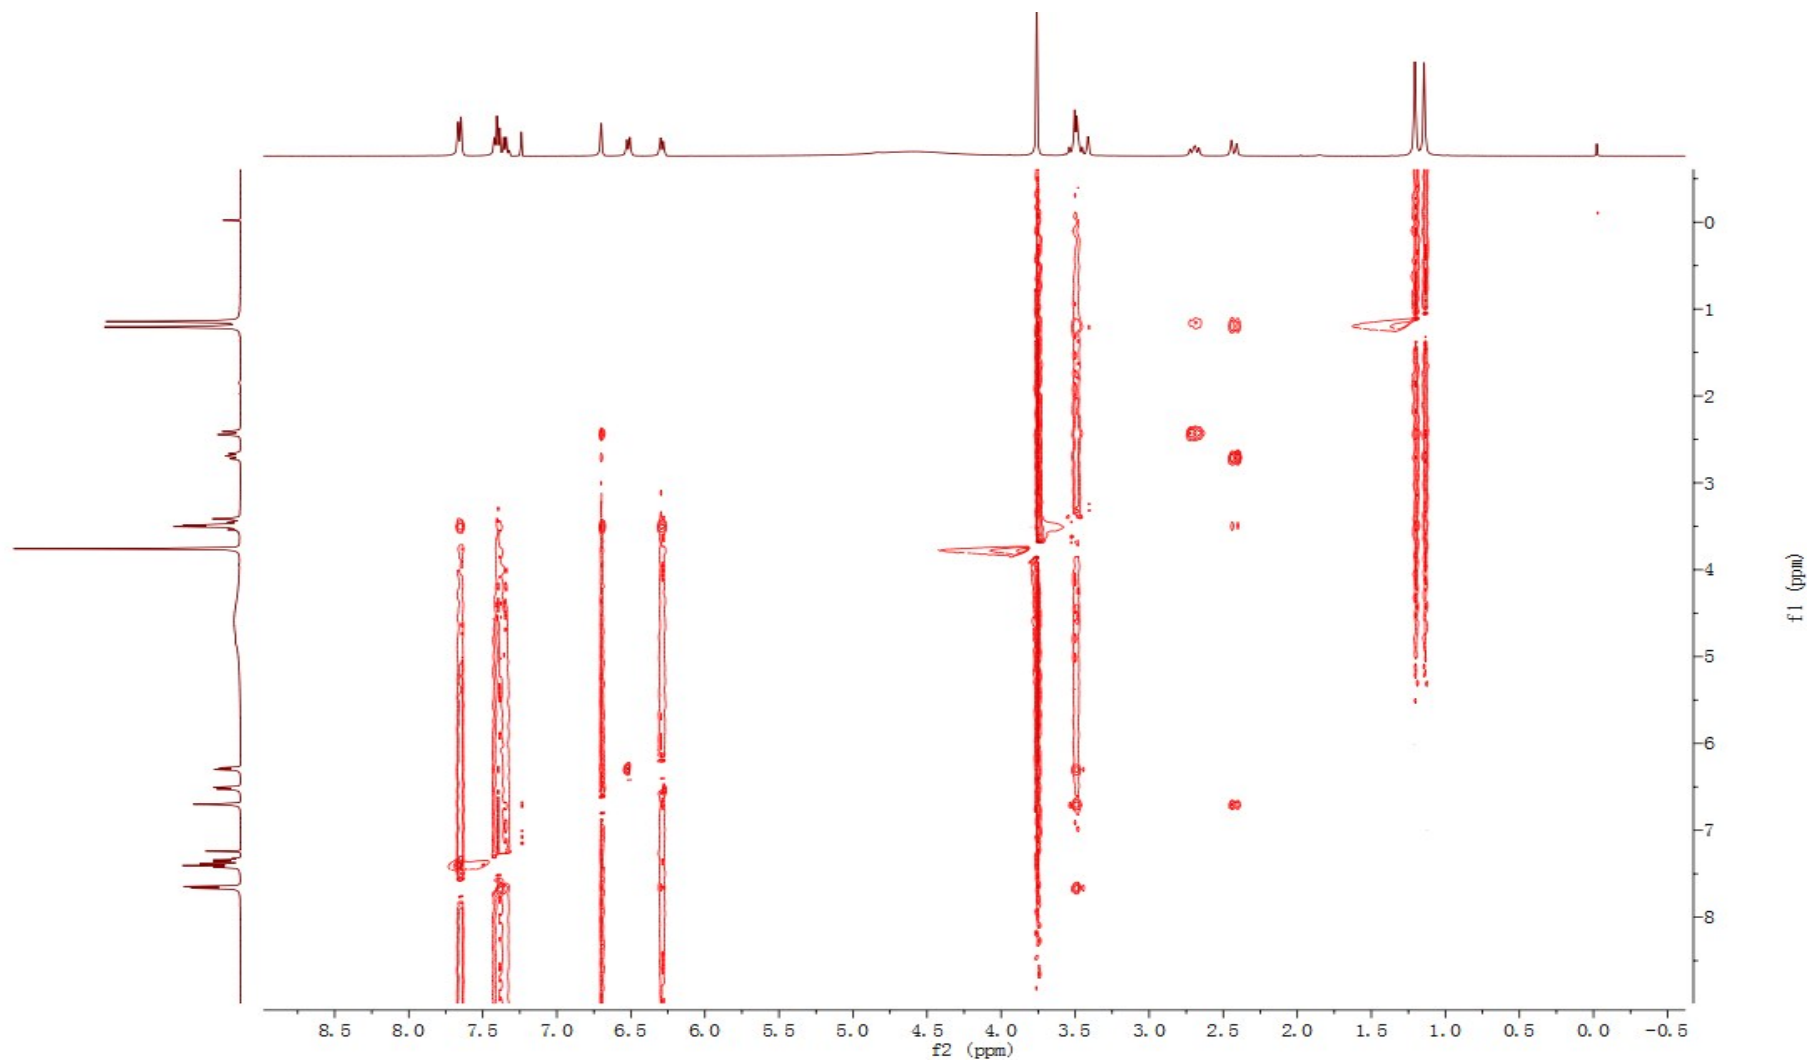

**Figure S7.** NOESY spectrum of compound **1** (Recorded in CDCl<sub>3</sub>)

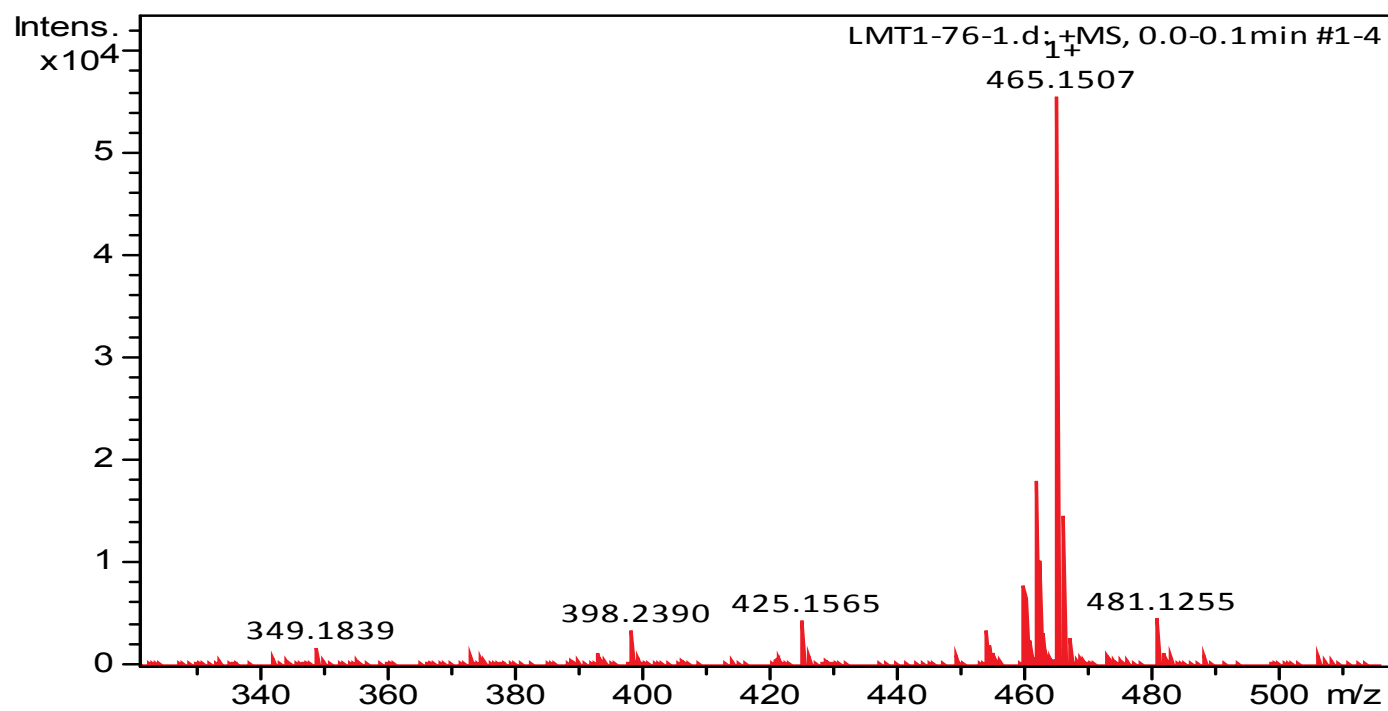

**Figure S8.** HRESIMS spectrum of compound 1

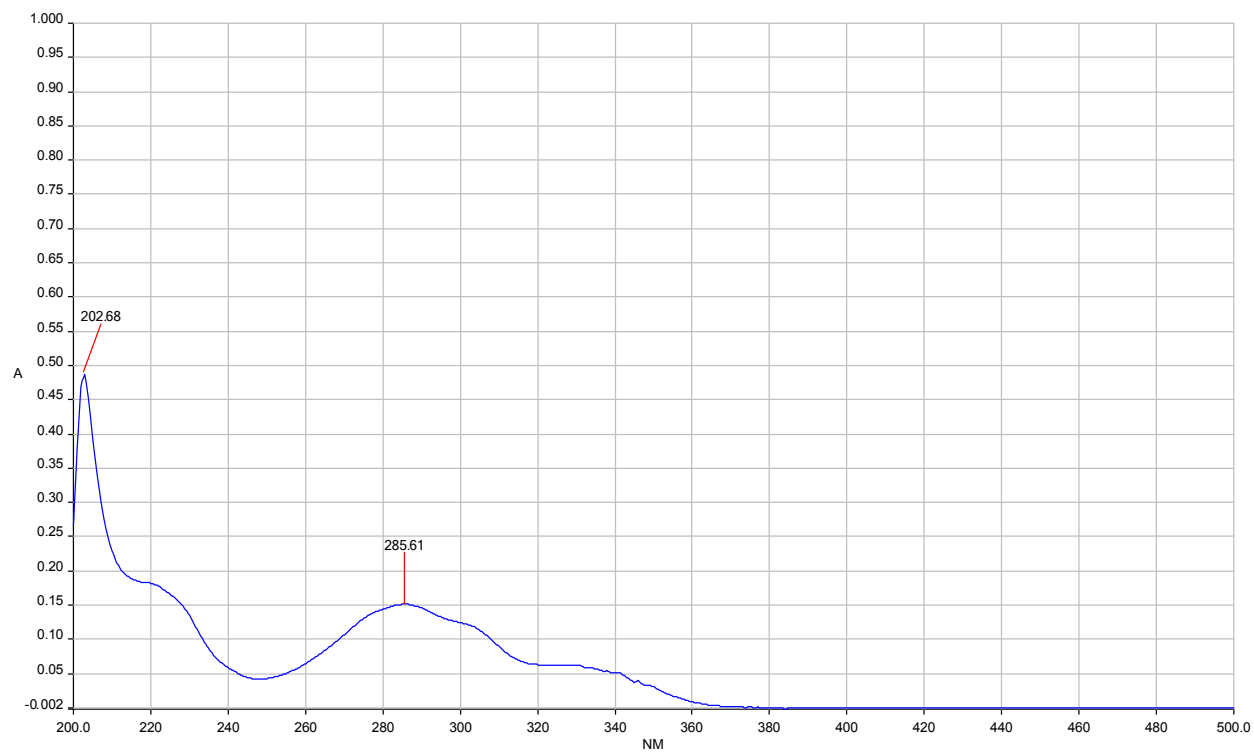

**Figure S9.** UV spectrum of compound **1**

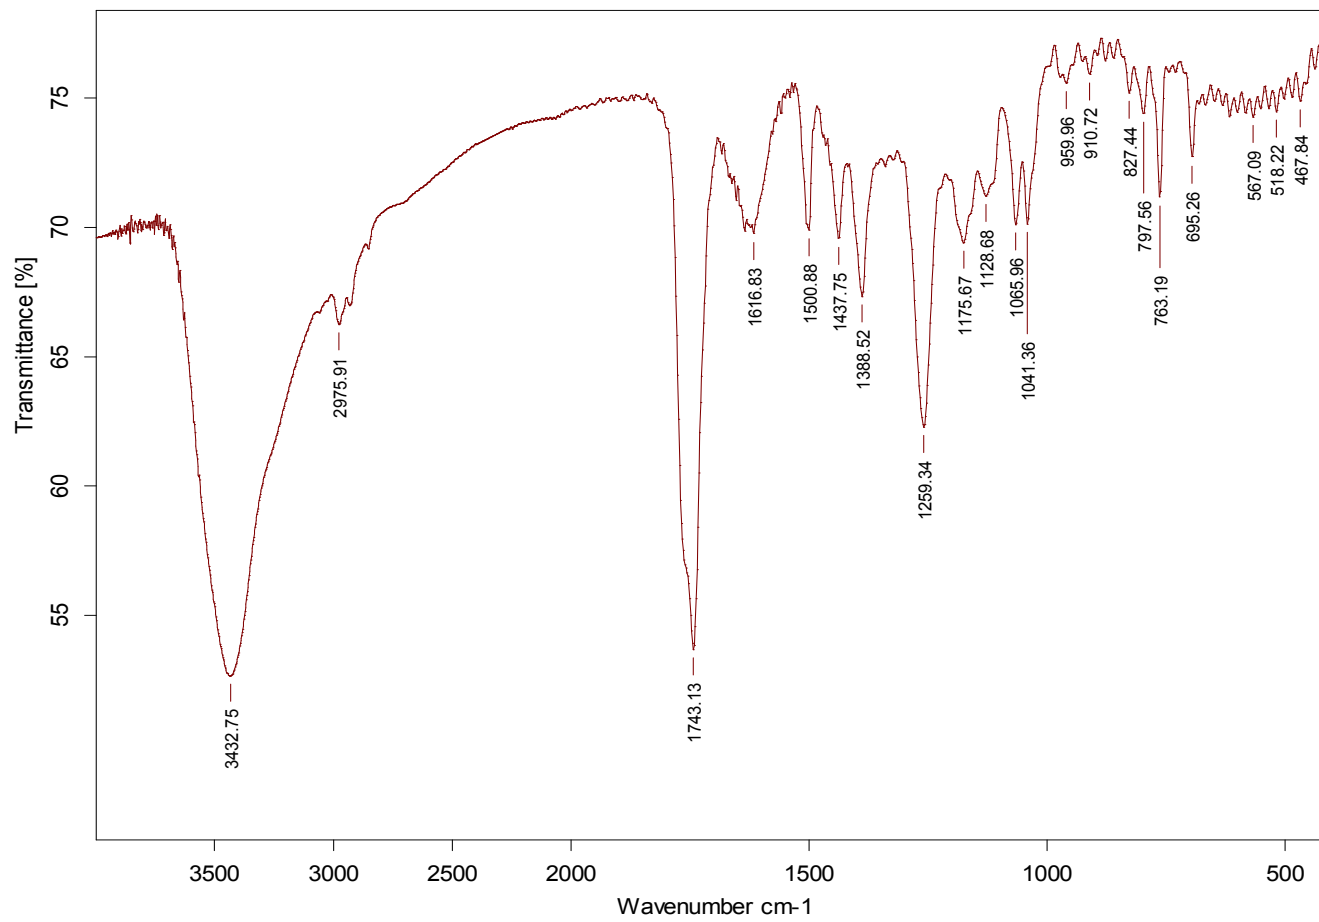

**Figure S10.** IR spectrum of compound **1**

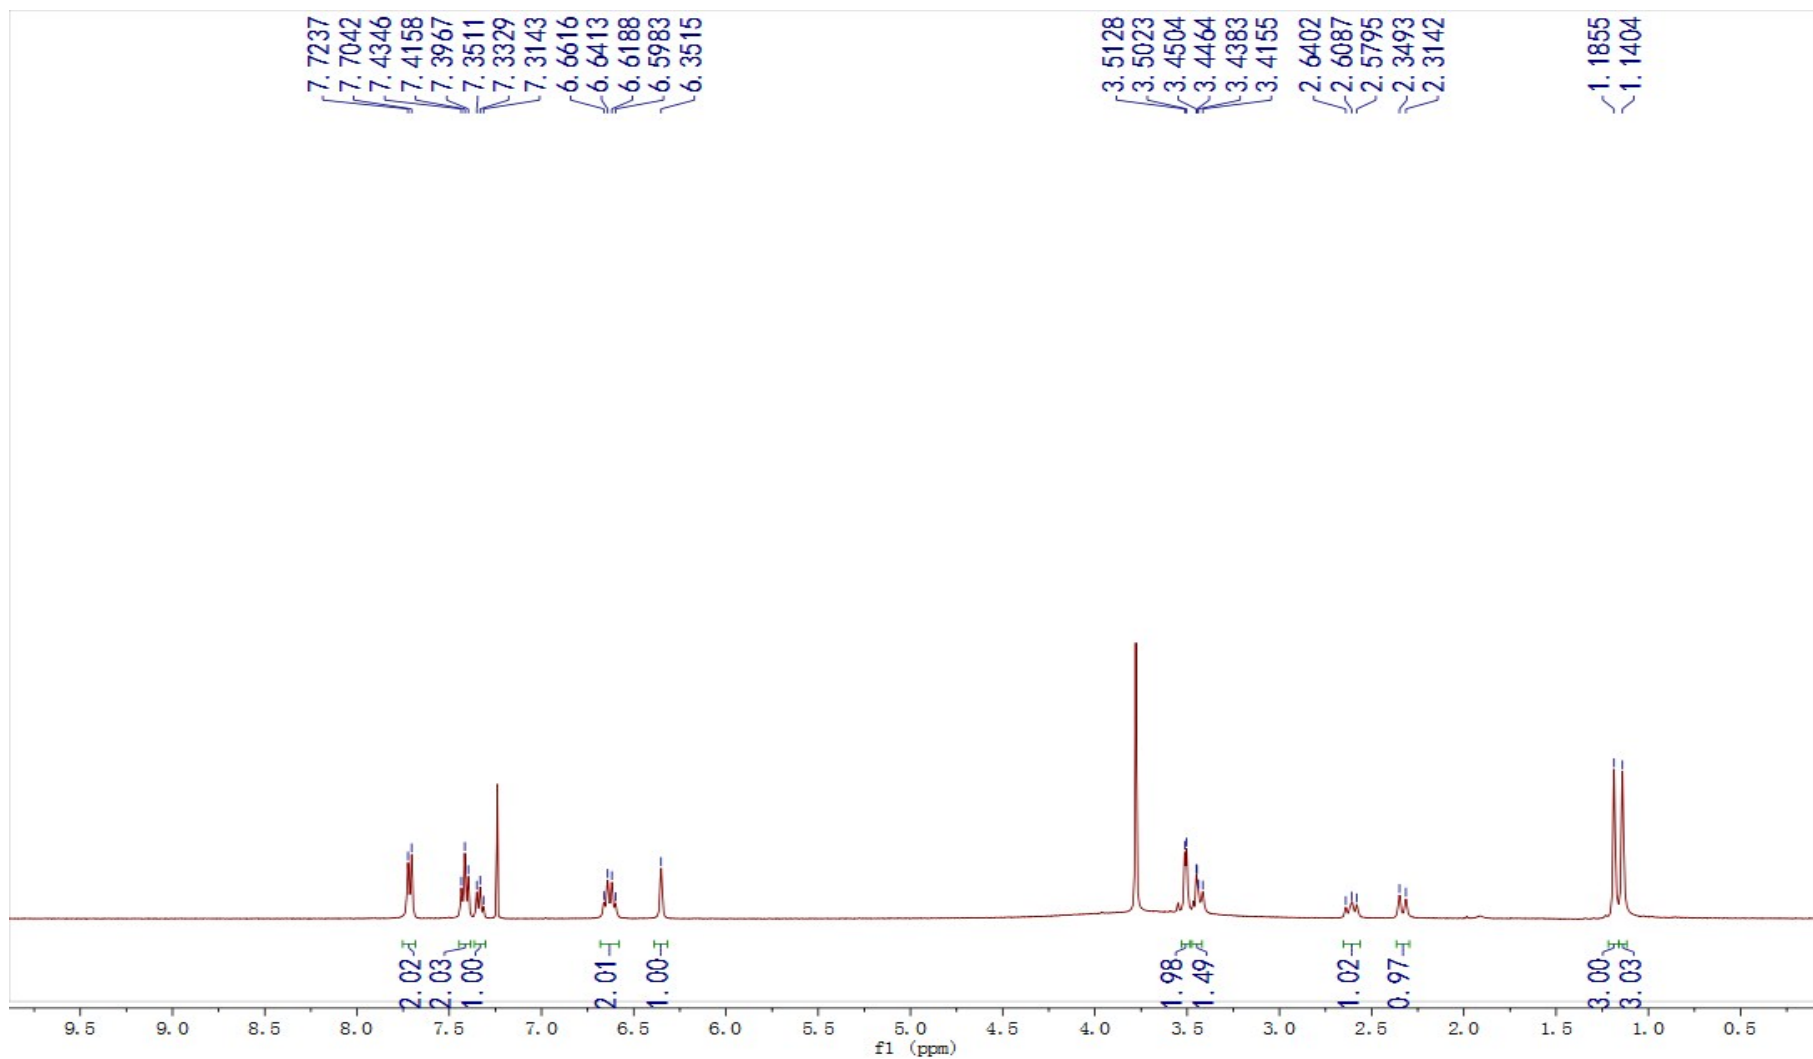

Figure S11. <sup>1</sup>H NMR spectrum of compound **2** (Recorded in CDCl<sub>3</sub>)

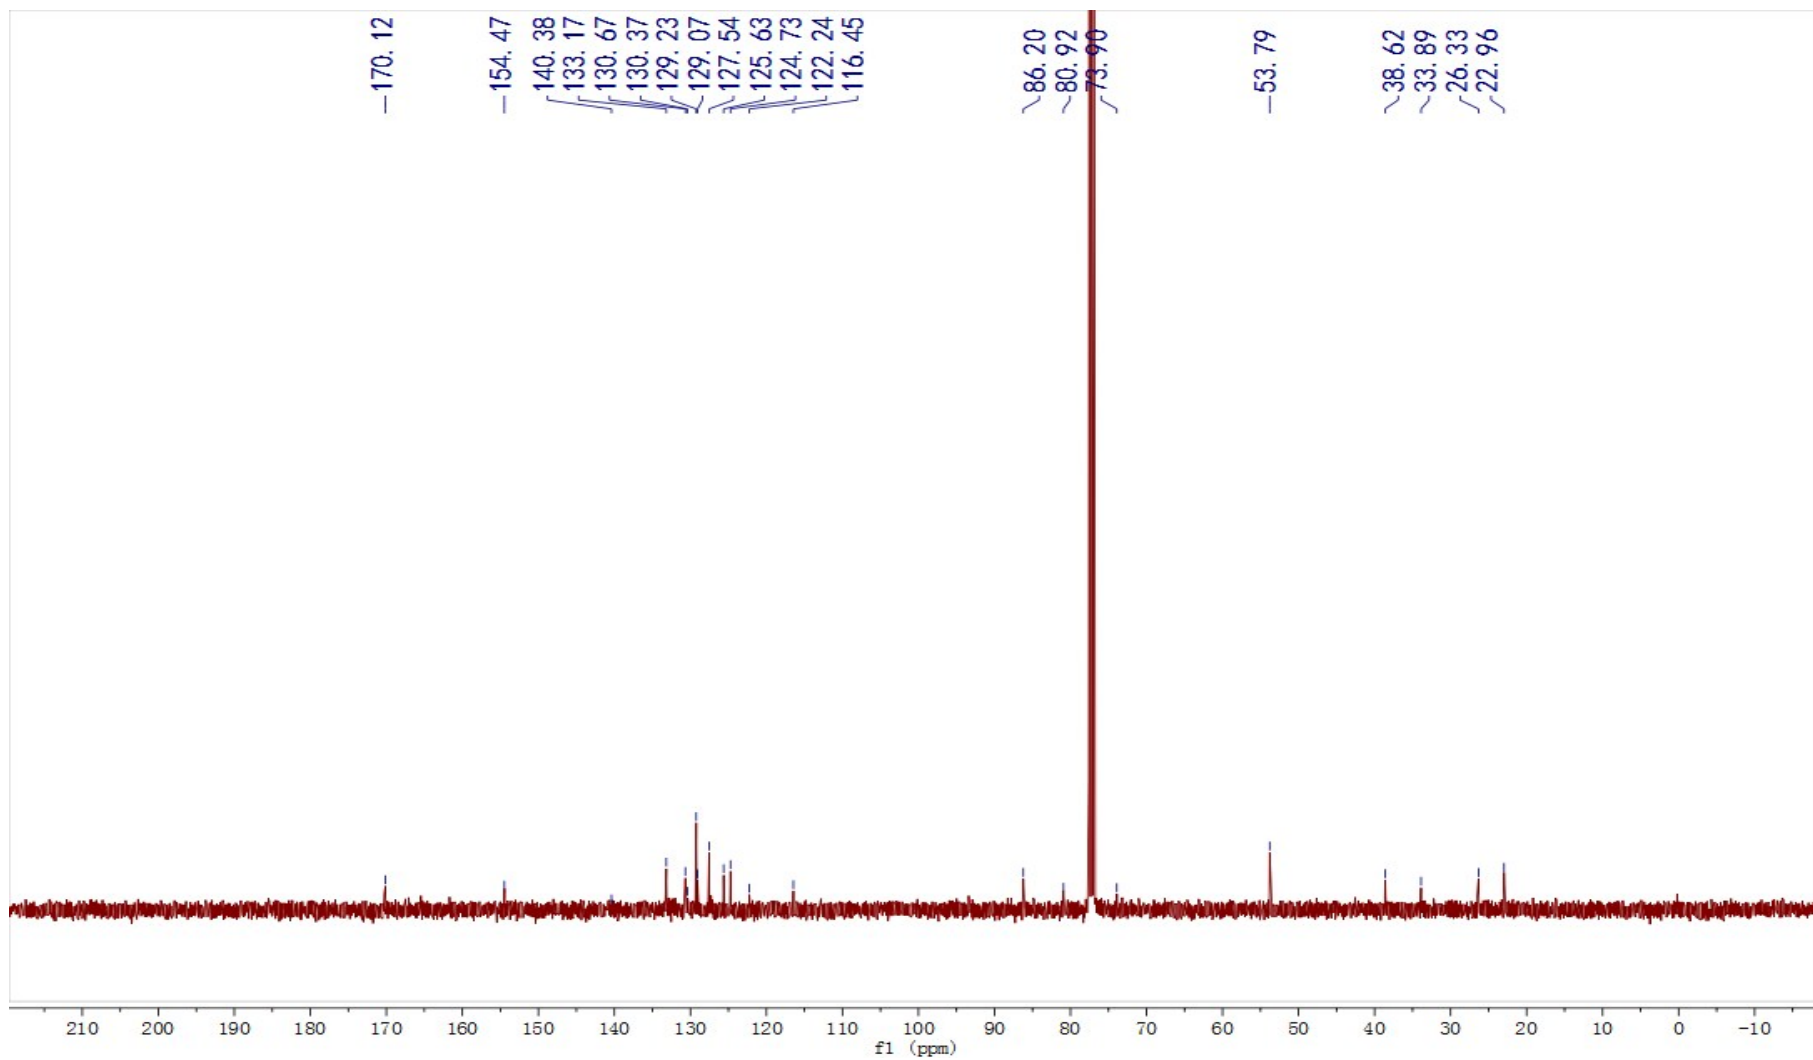

**Figure S12.**  $^{13}\text{C}$  NMR spectrum of compound **2** (Recorded in  $\text{CDCl}_3$ )



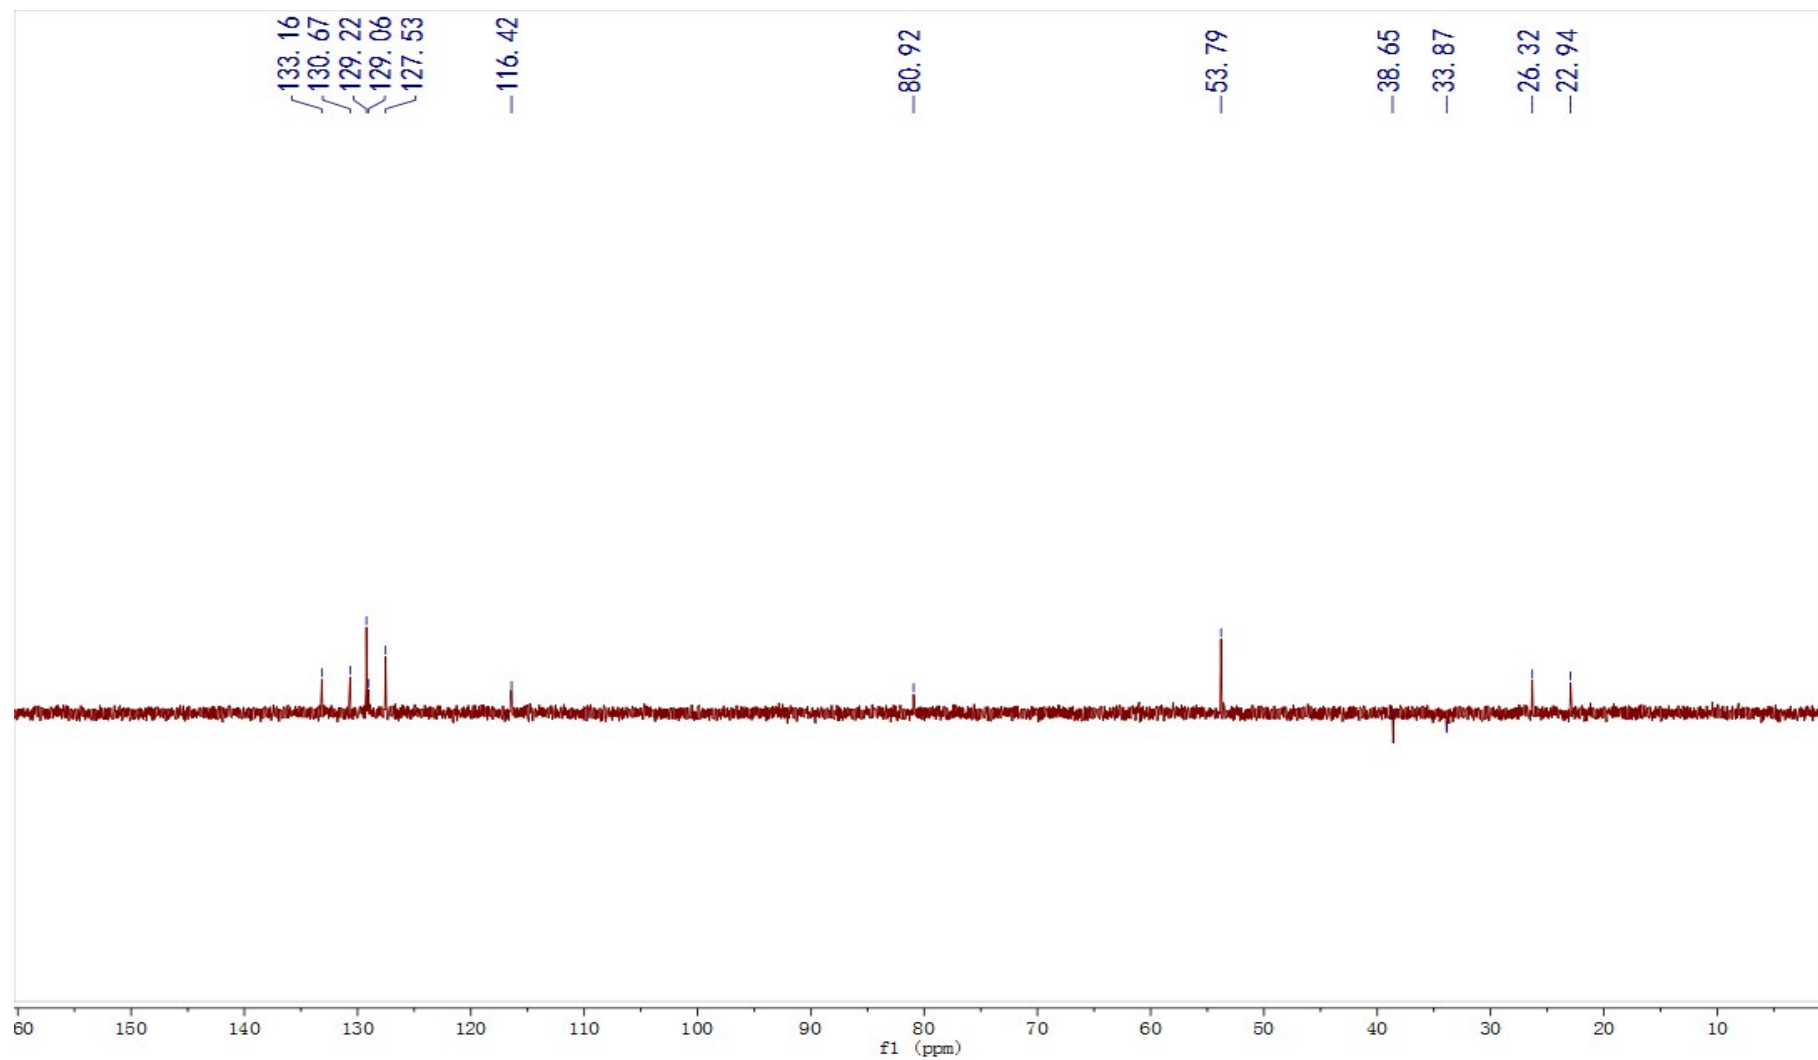

Figure S13. DEPT spectrum of compound 2 (Recorded in CDCl<sub>3</sub>)

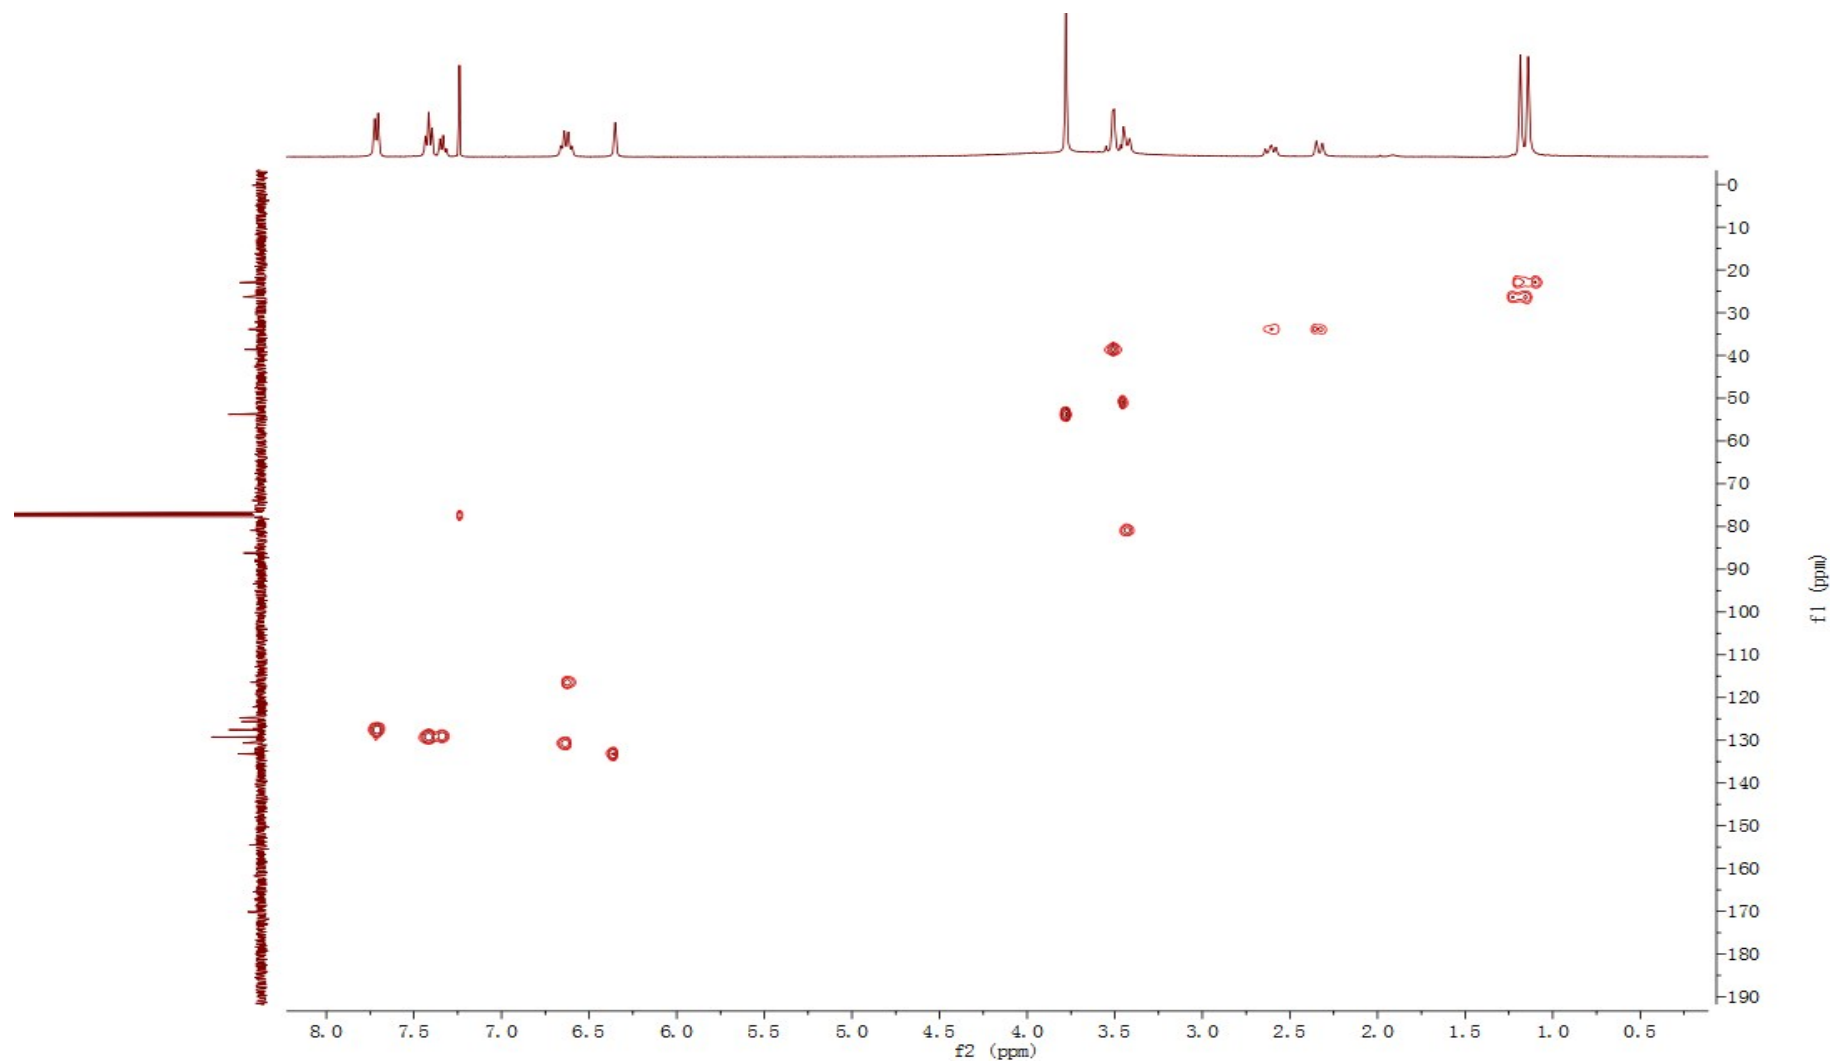

Figure S14. HSQC spectrum of compound 2 (Recorded in  $\text{CDCl}_3$ )

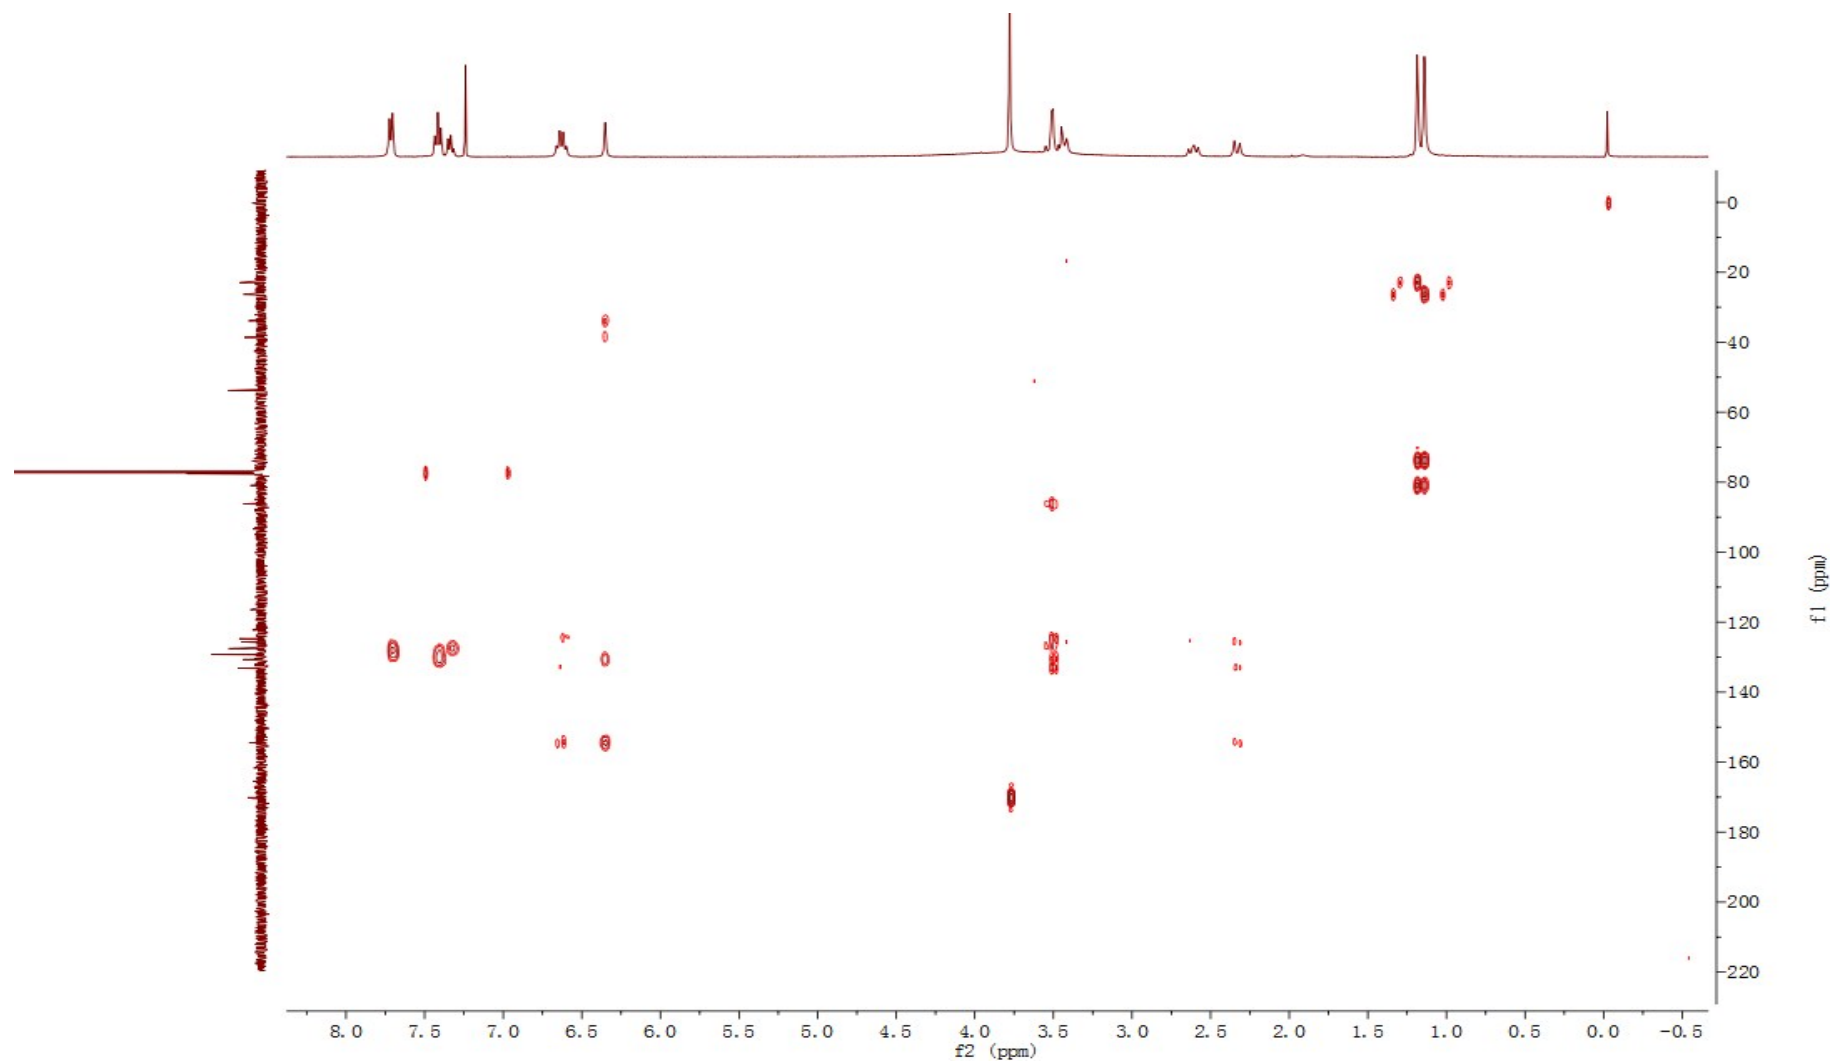

**Figure S15.** HMBC spectrum of compound **2** (Recorded in CDCl<sub>3</sub>)

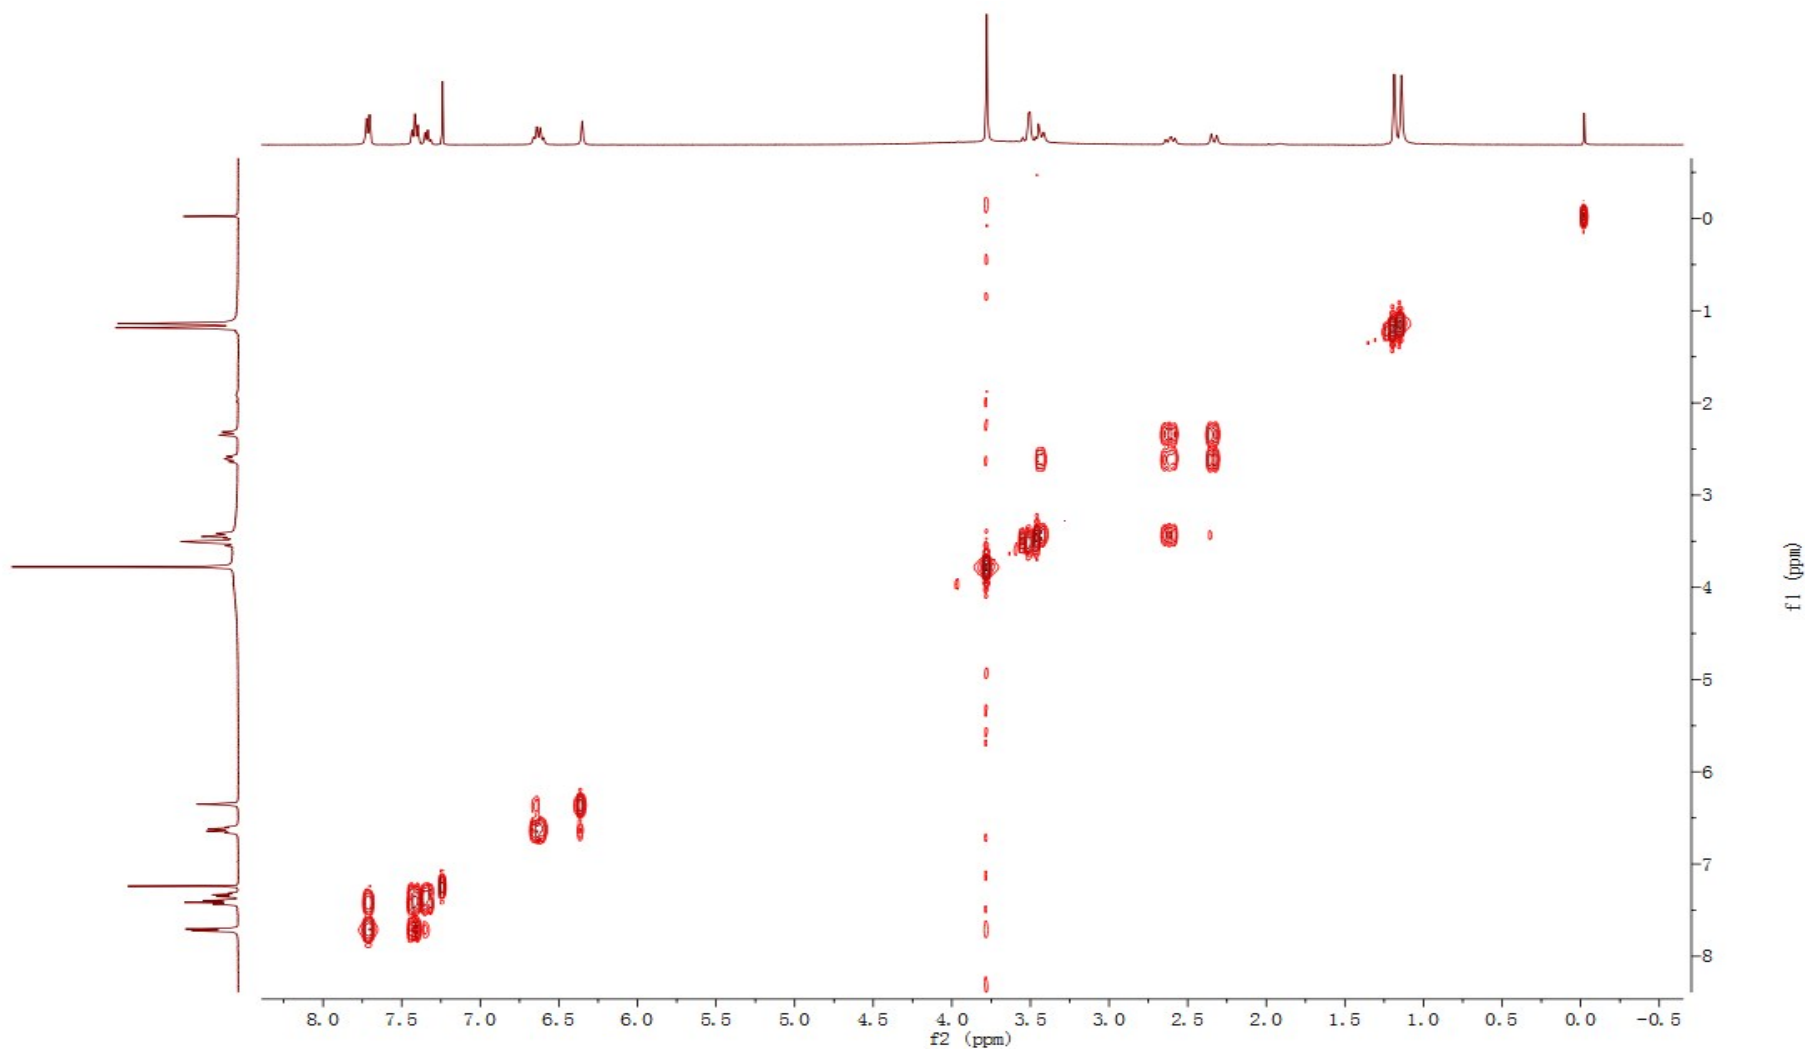

Figure S16.  $^1\text{H}$ - $^1\text{H}$  COSY spectrum of compound **2** (Recorded in  $\text{CDCl}_3$ )

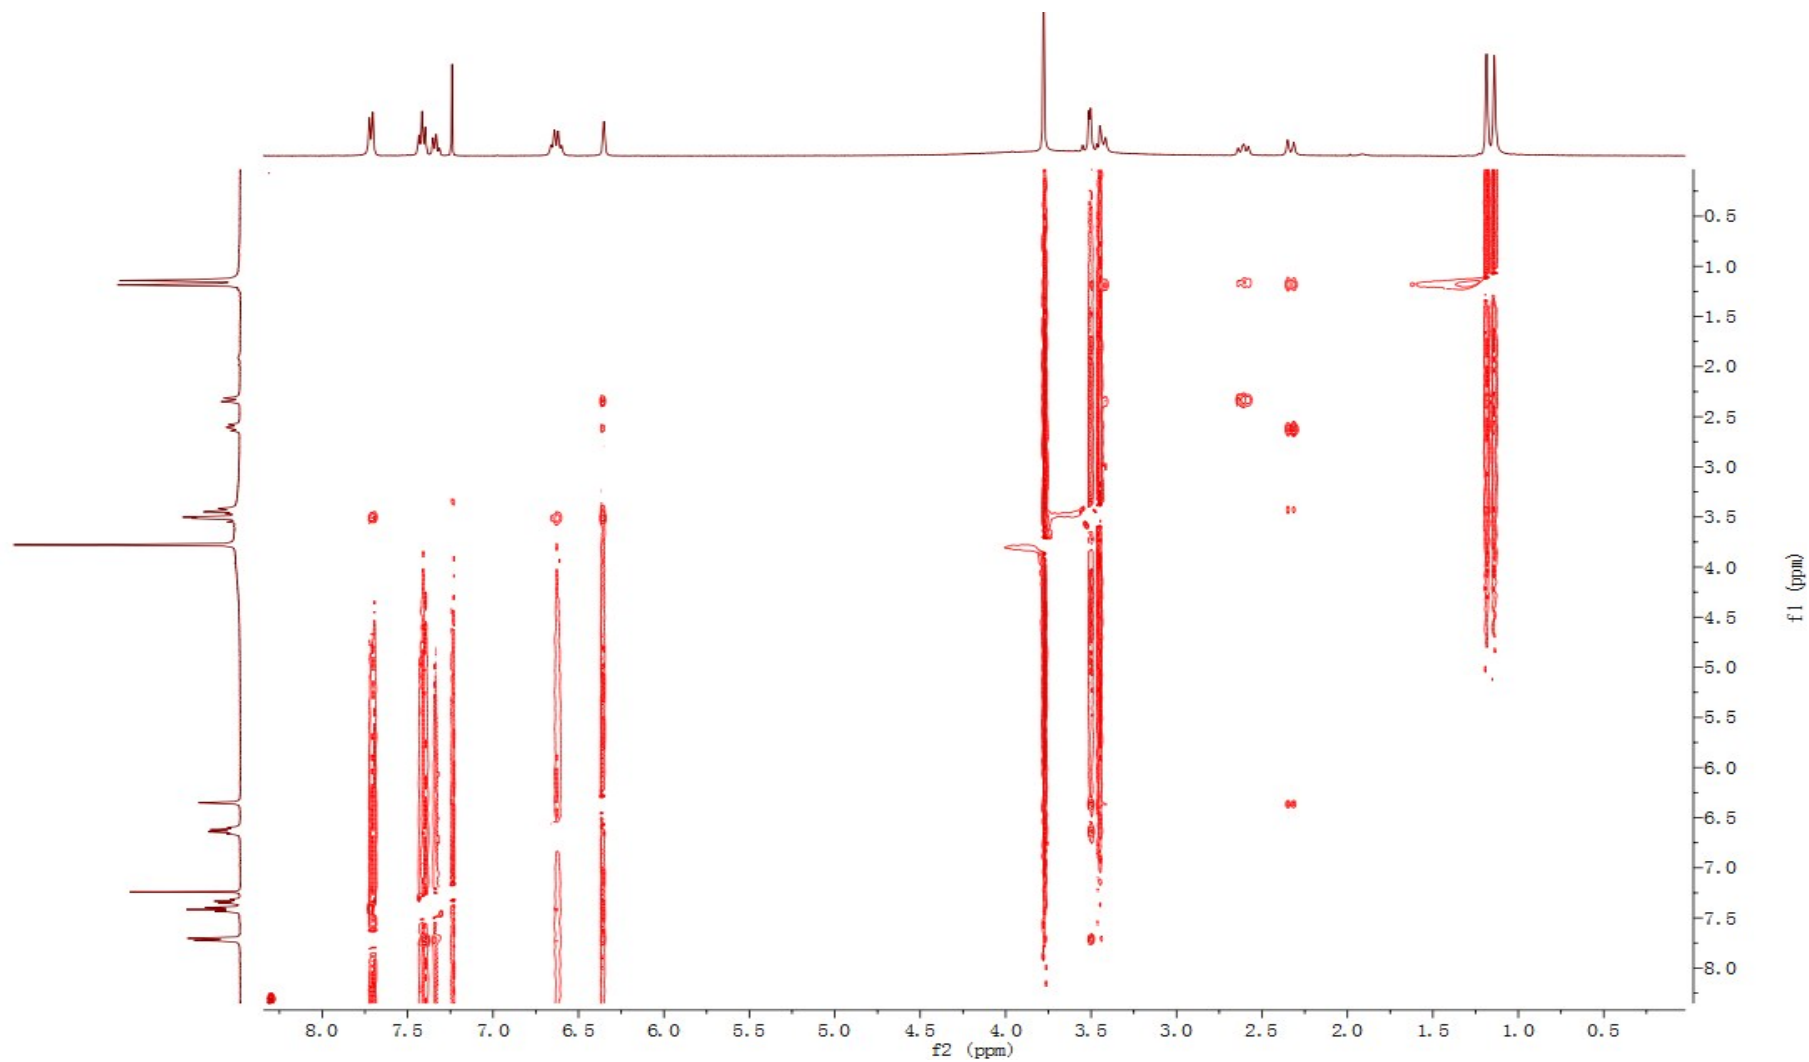

**Figure S17.** NOESY spectrum of compound **2** (Recorded in CDCl<sub>3</sub>)

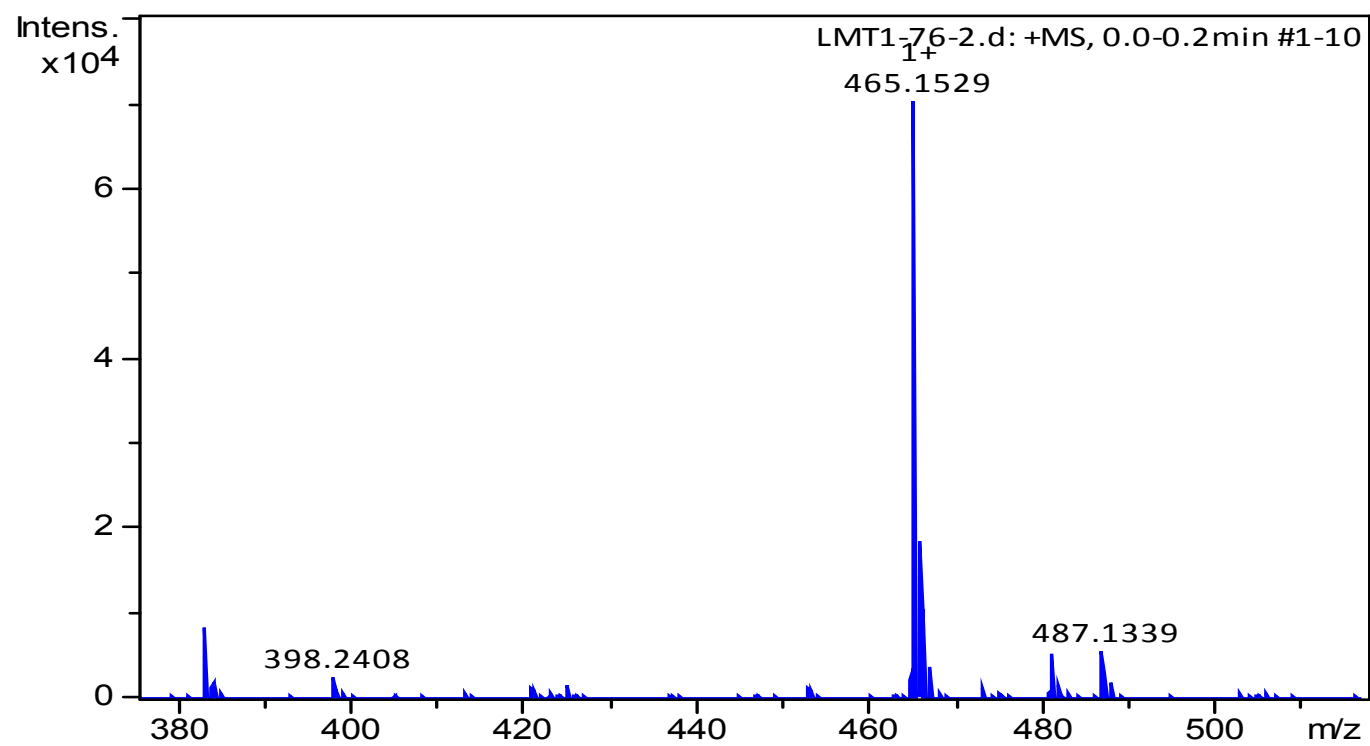

**Figure S18.** HRESIMS spectrum of compound 2

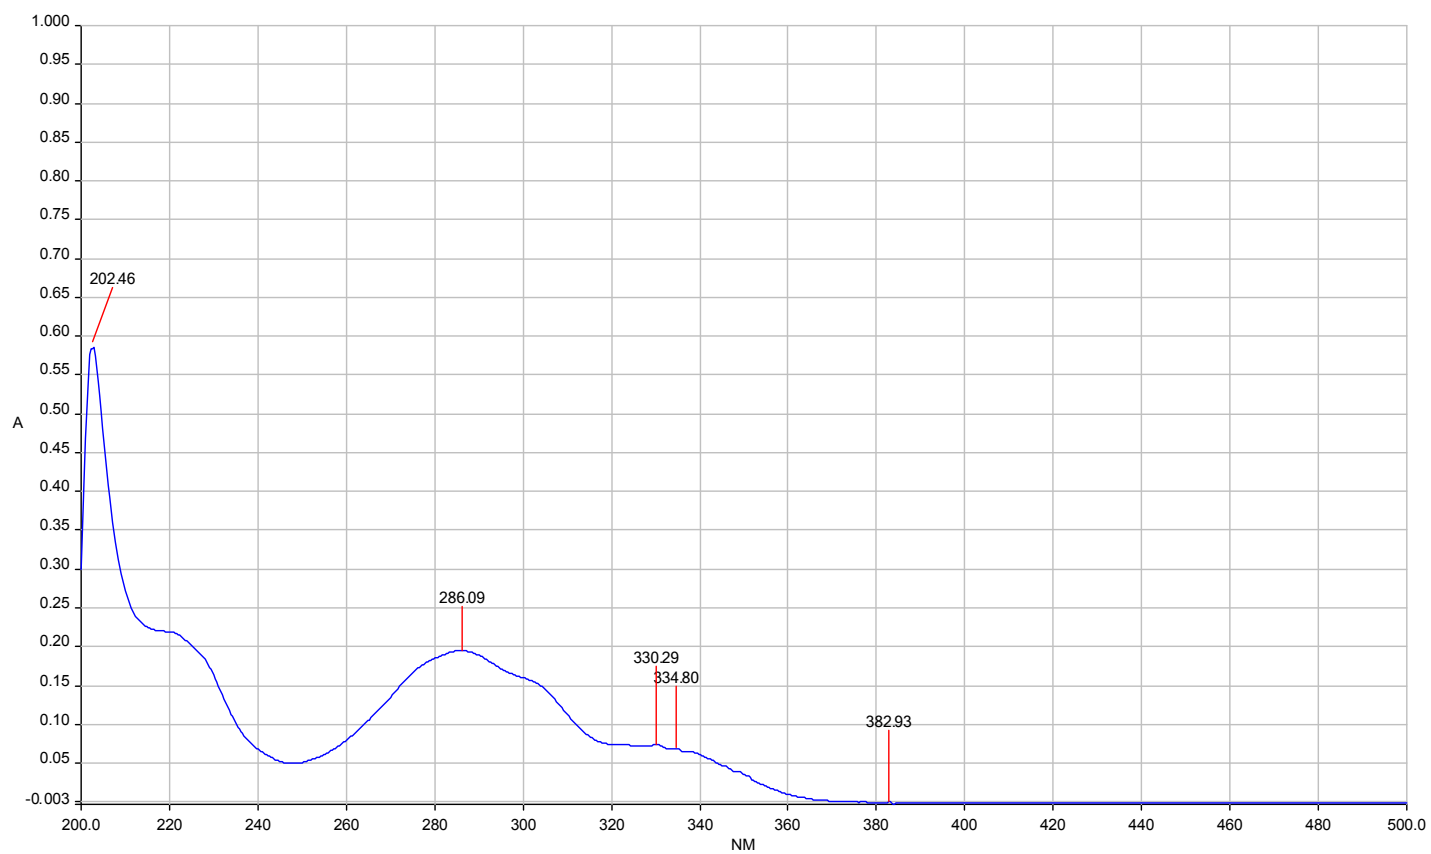

**Figure S19.** UV spectrum of compound 2

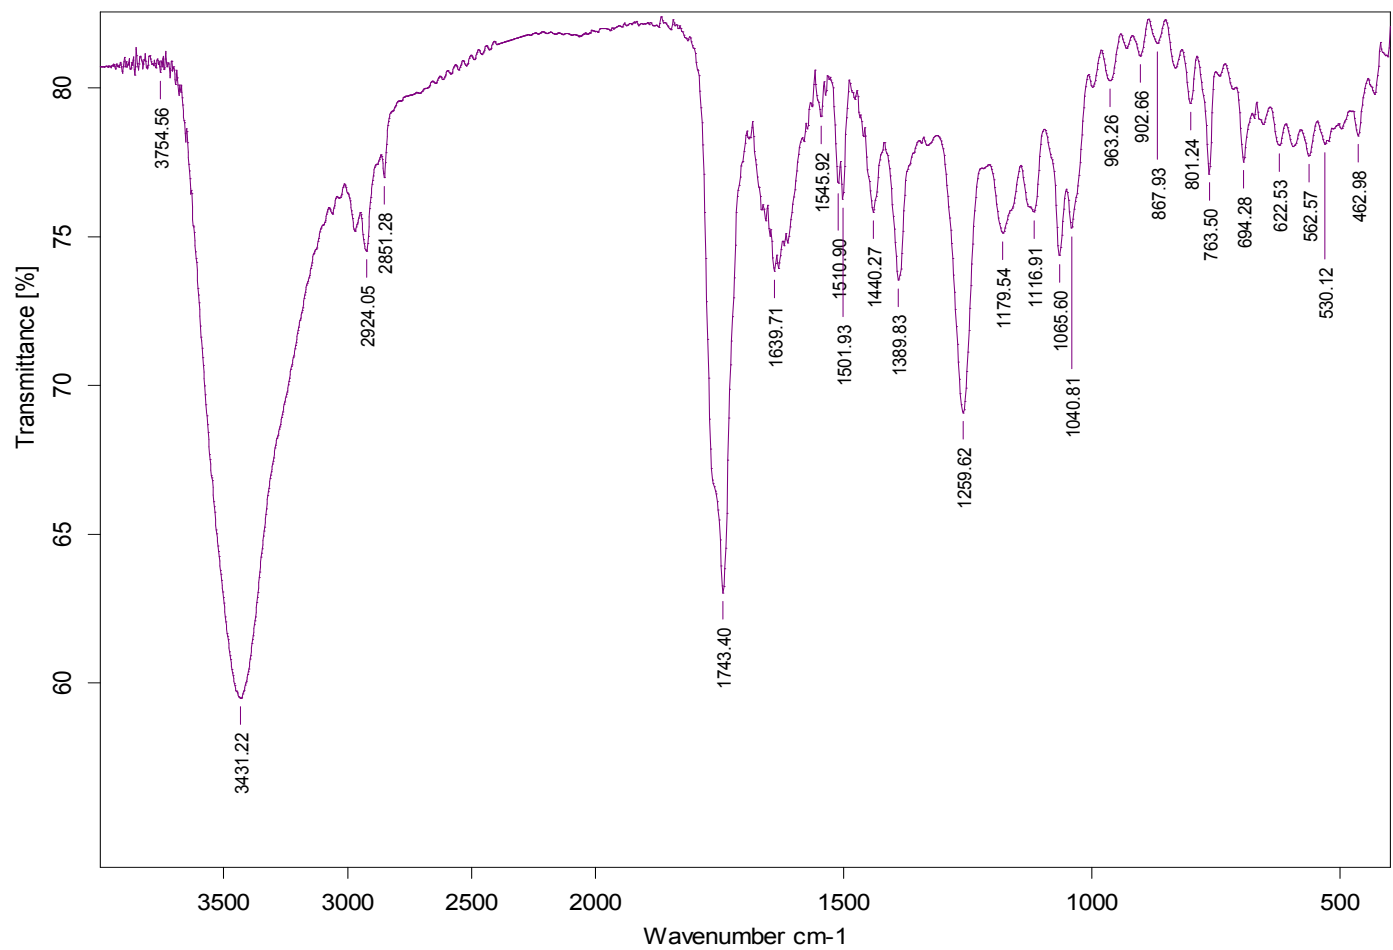

**Figure S20.** IR spectrum of compound **2**



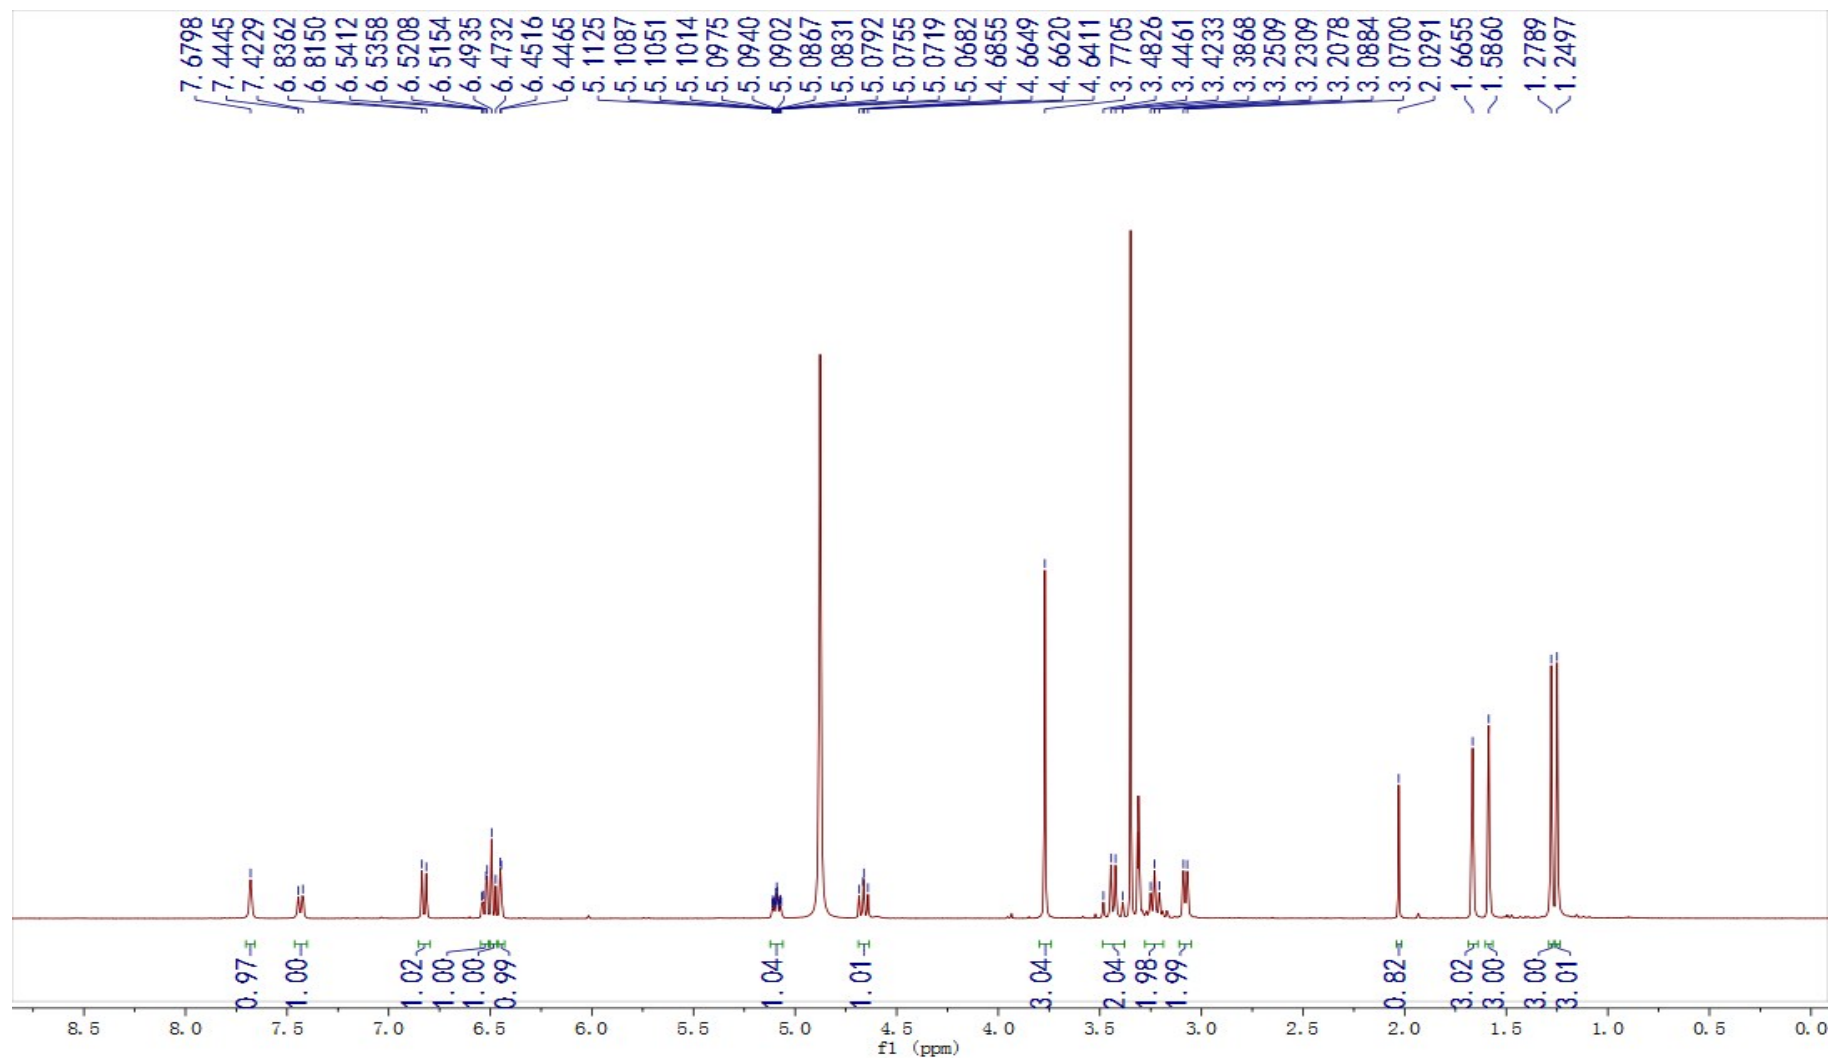

Figure S21. <sup>1</sup>H NMR spectrum of compound 3 (Recorded in methanol-*d*<sub>4</sub>)

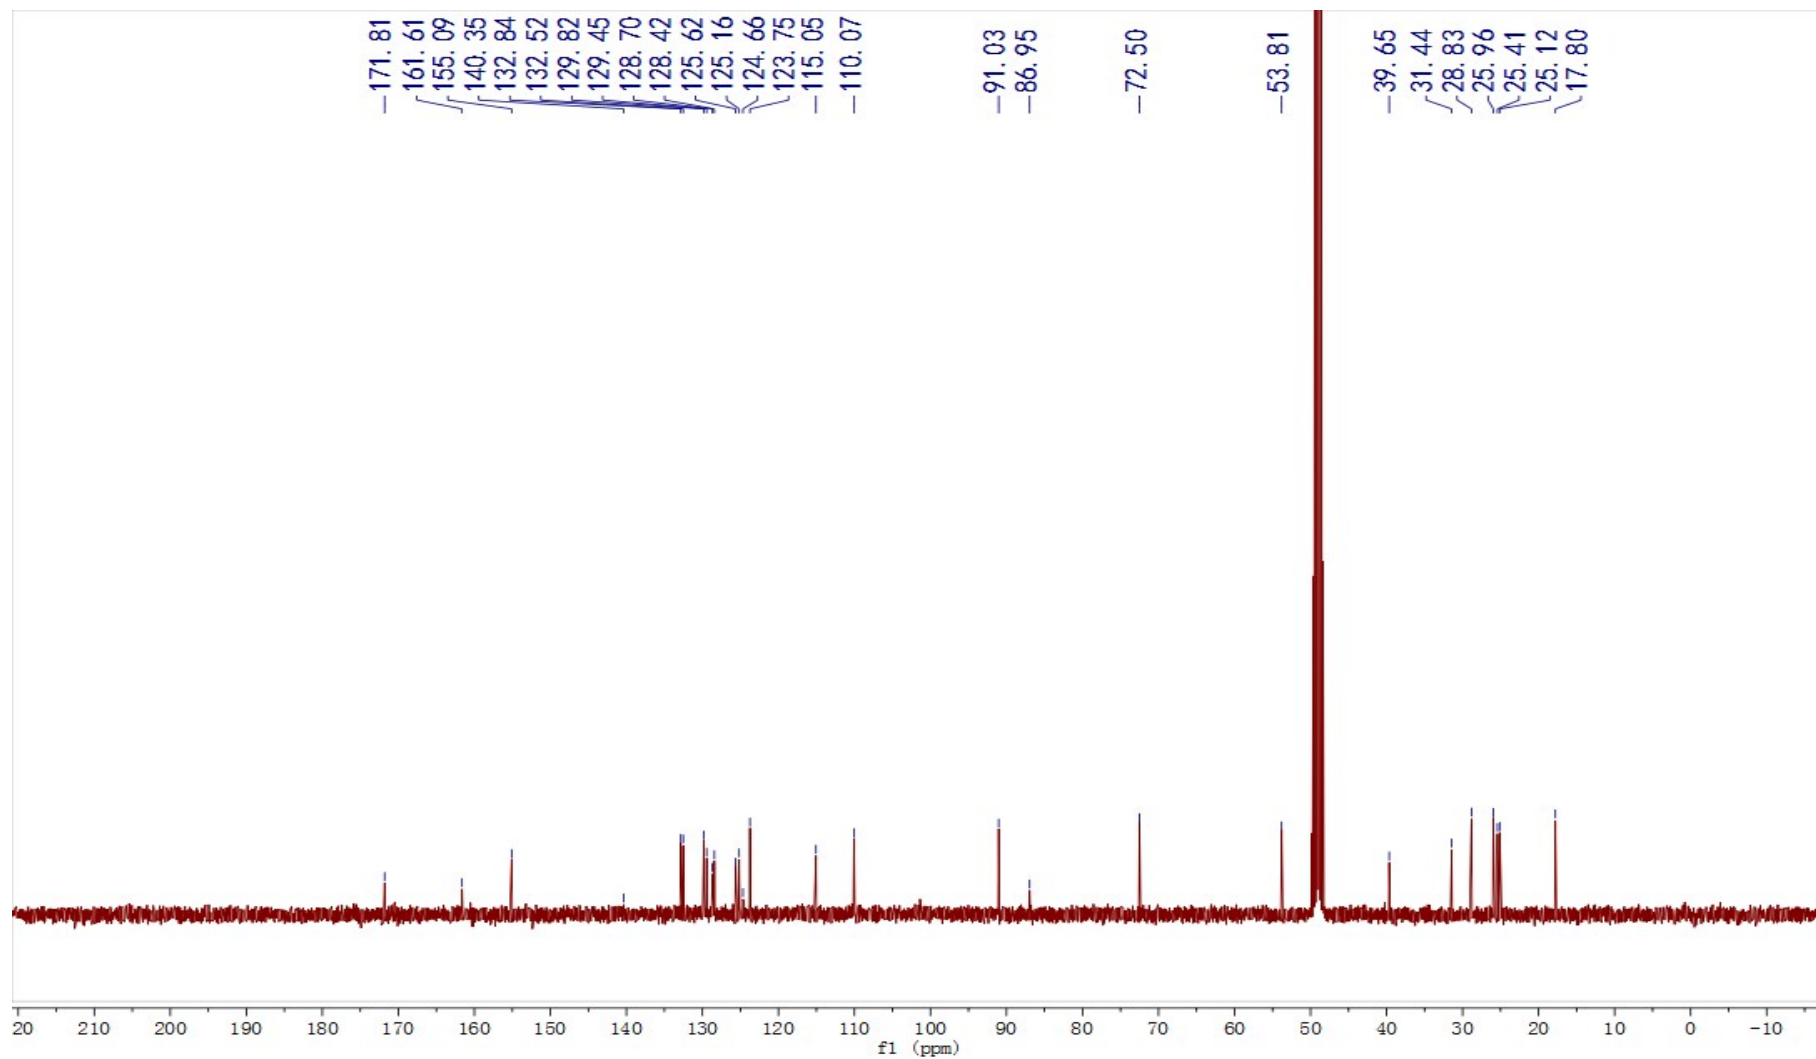

**Figure S22.**  $^{13}\text{C}$  NMR spectrum of compound **3** (Recorded in methanol- $d_4$ )

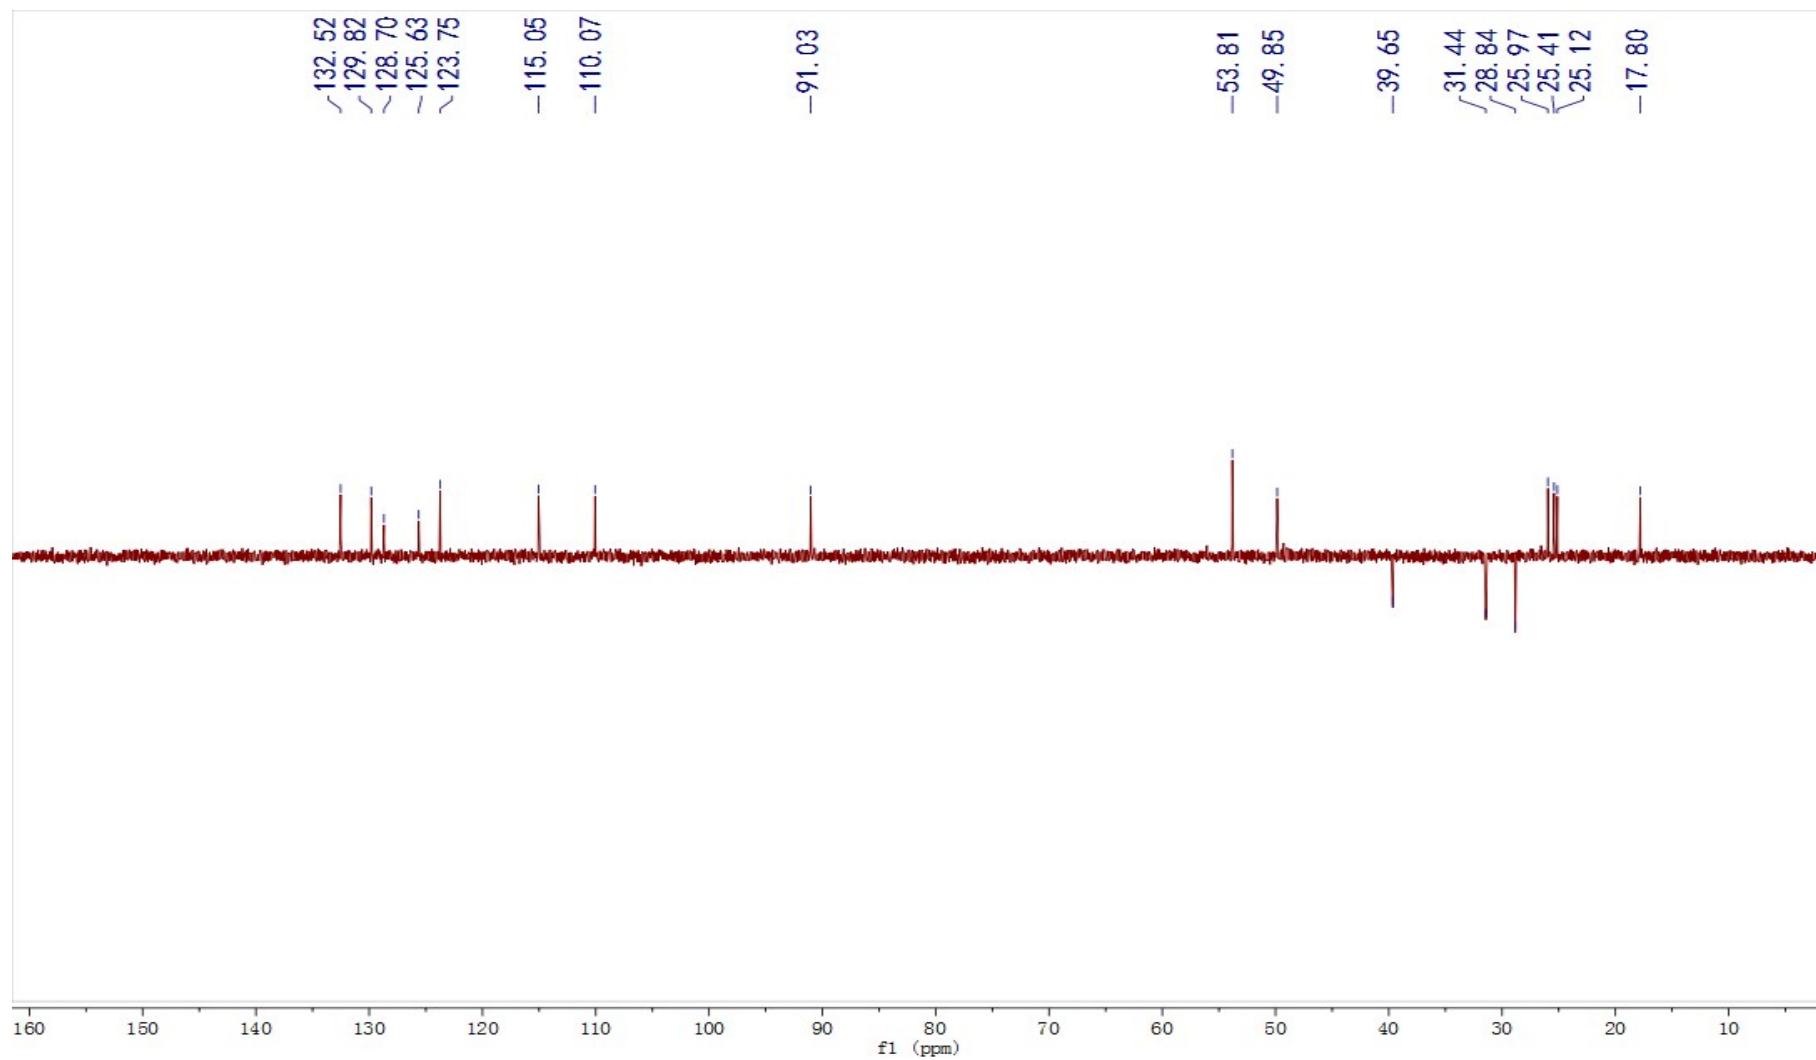

Figure S23. DEPT spectrum of compound **3** (Recorded in methanol- $d_4$ )

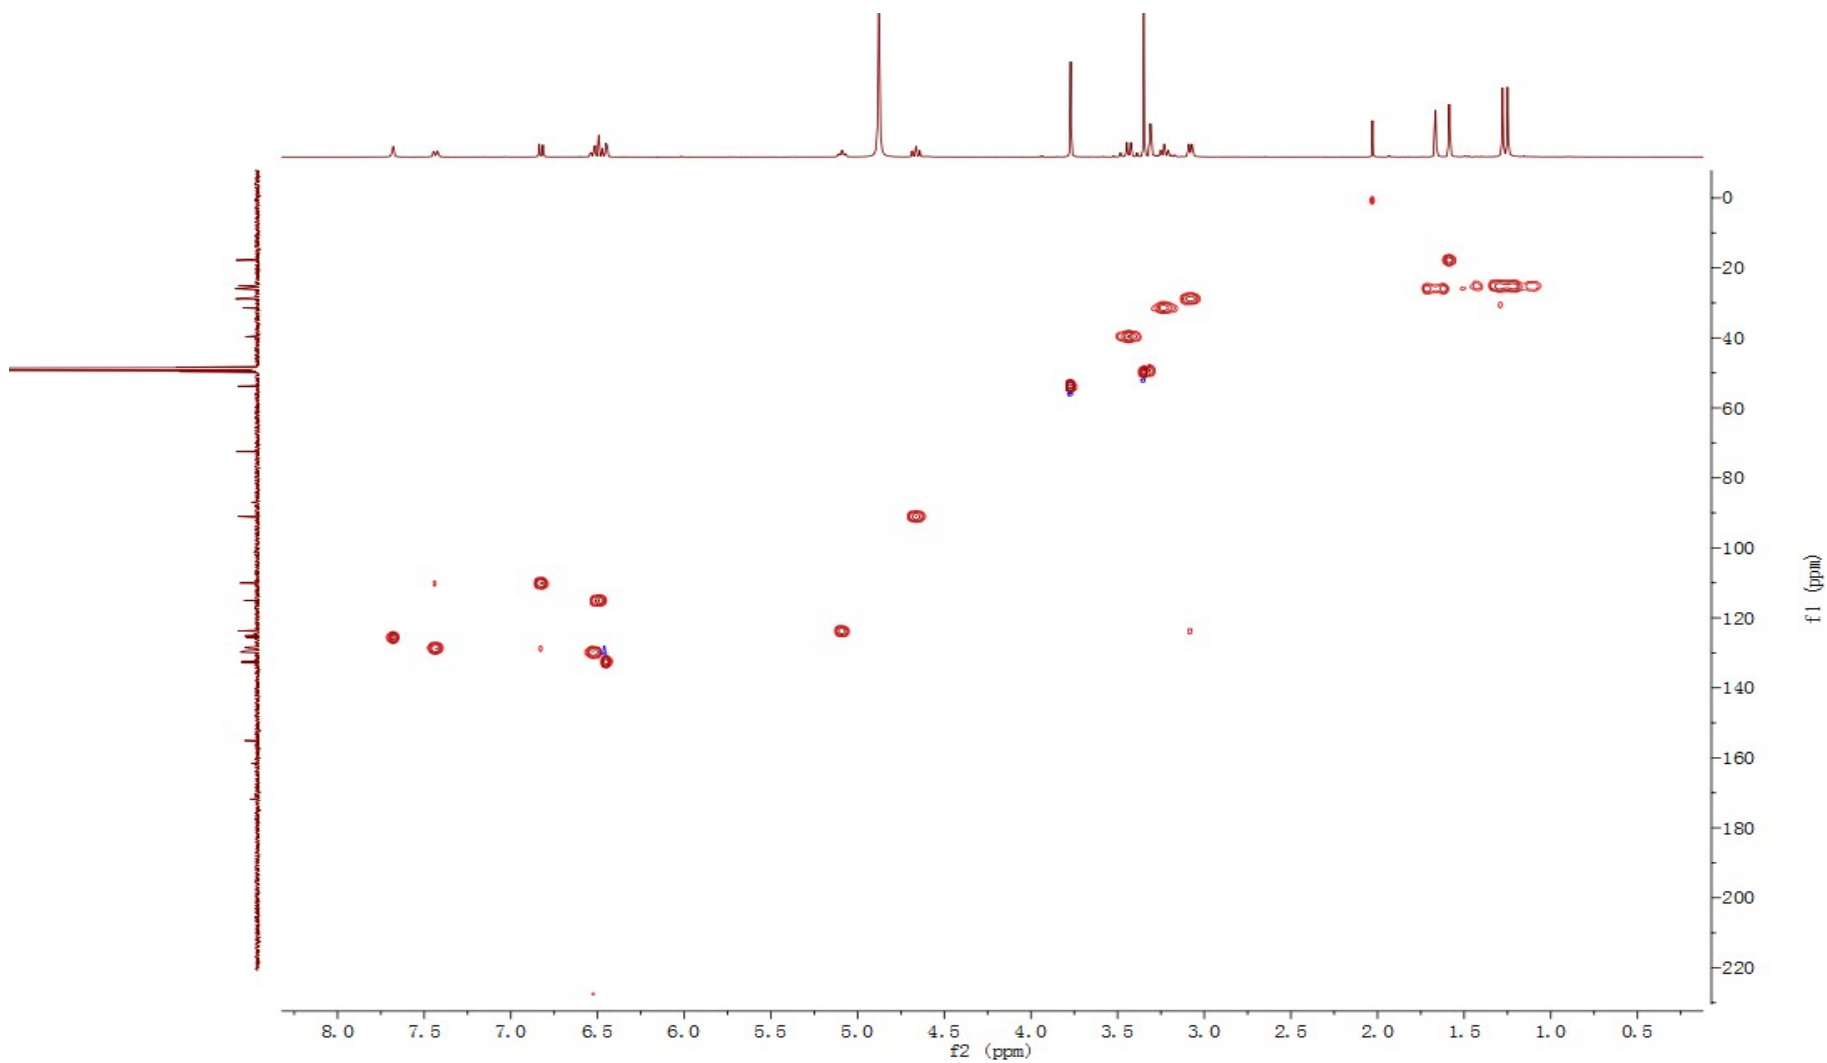

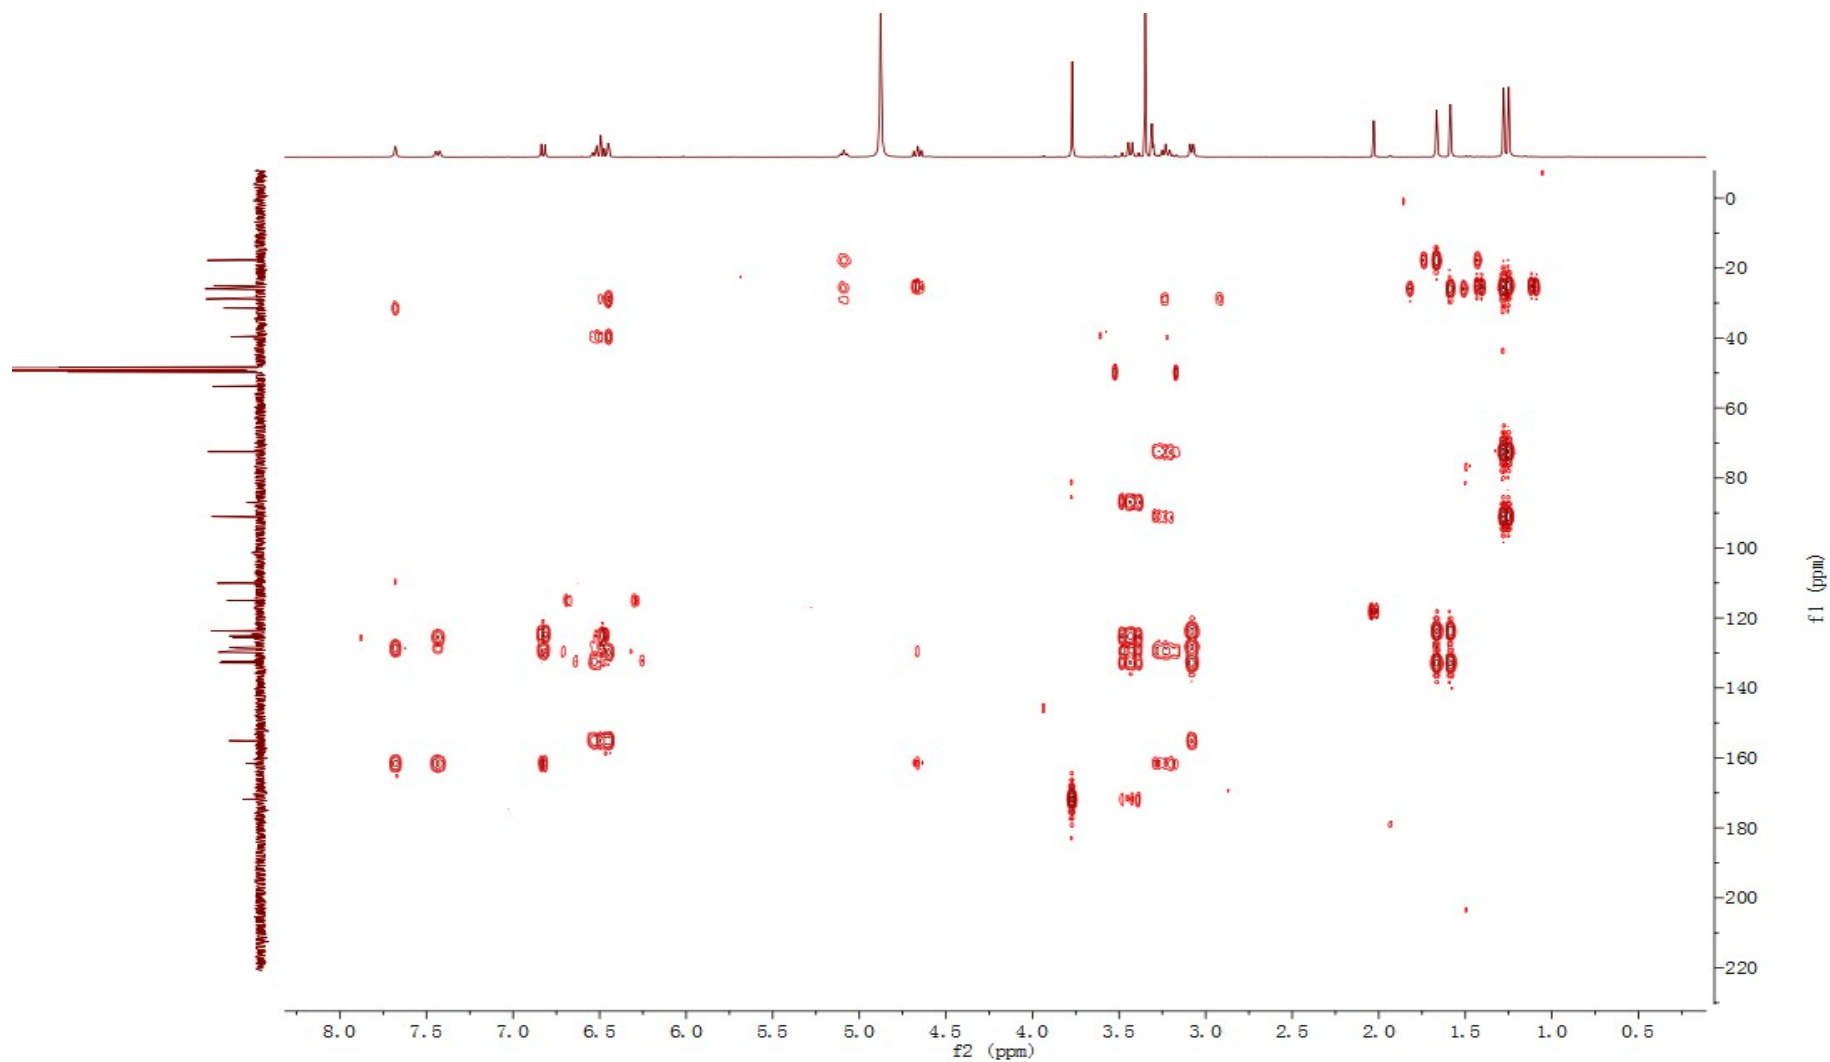

Figure S25. HMBC spectrum of compound **3** (Recorded in methanol- $d_4$ )

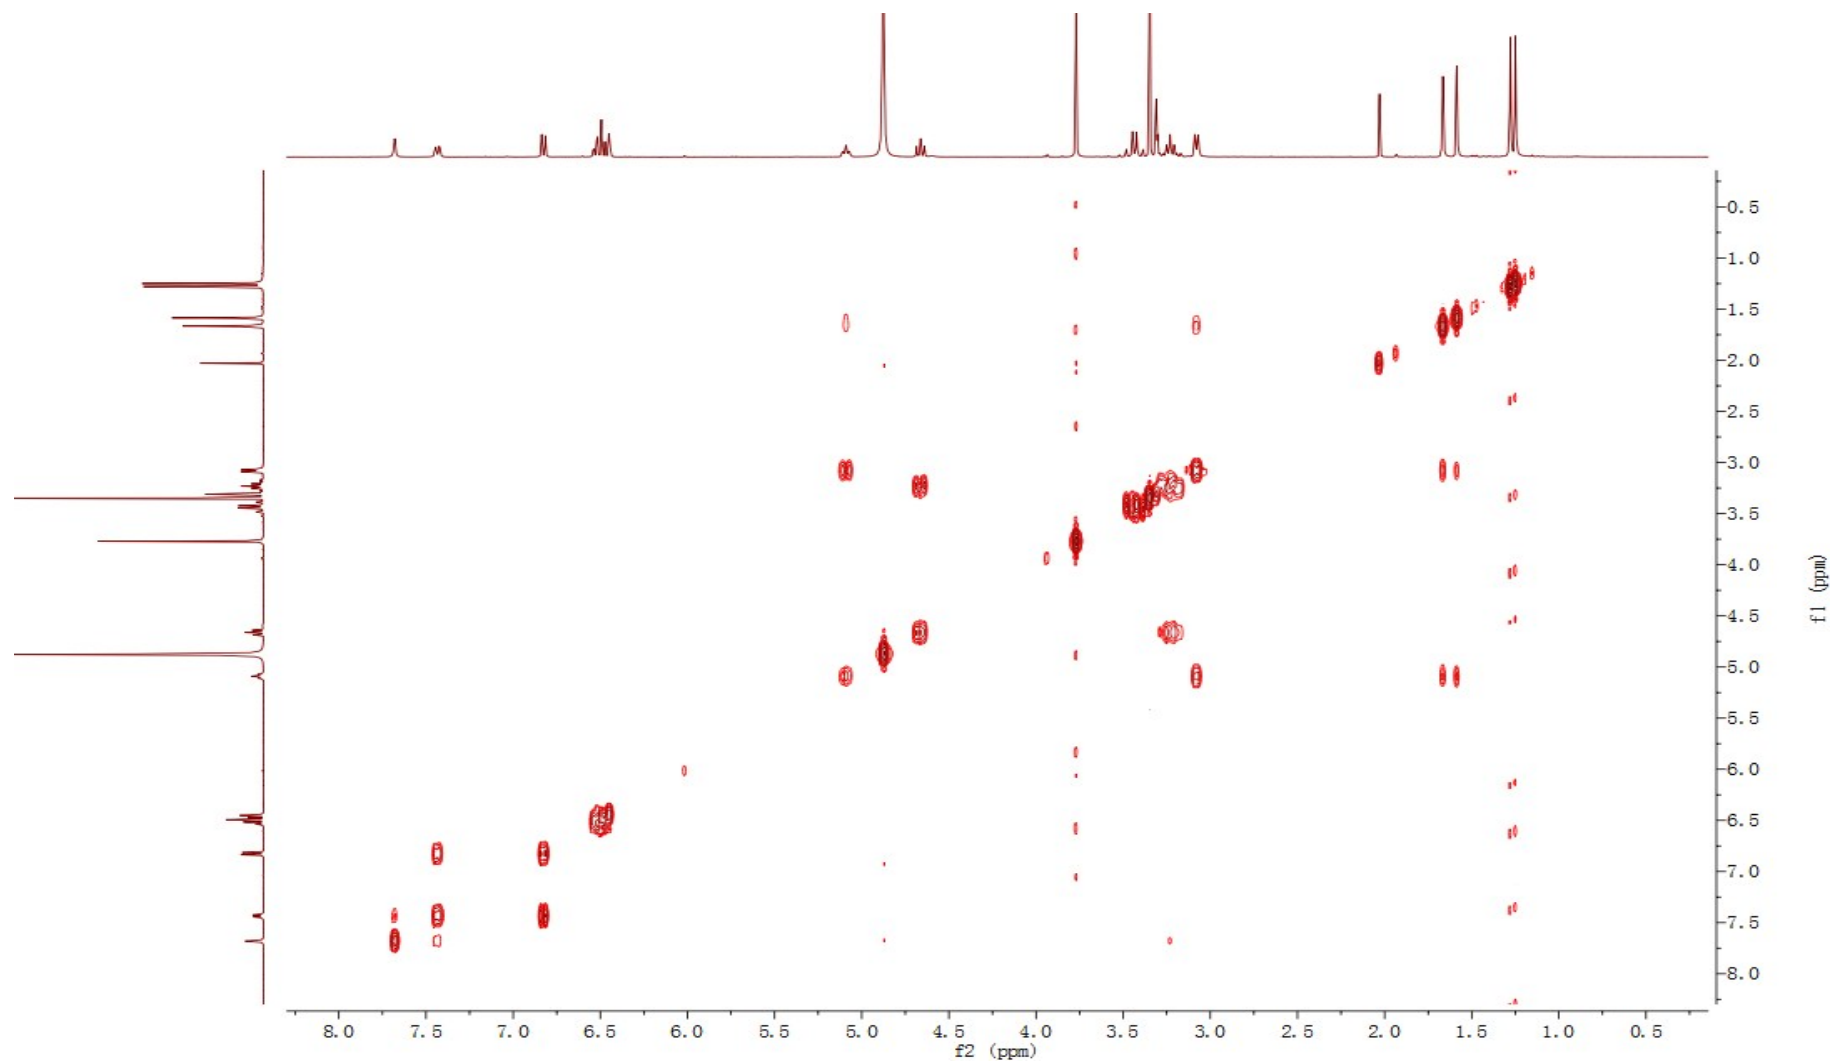

**Figure S26.**  $^1\text{H}$ - $^1\text{H}$  COSY spectrum of compound **3** (Recorded in methanol- $d_4$ )

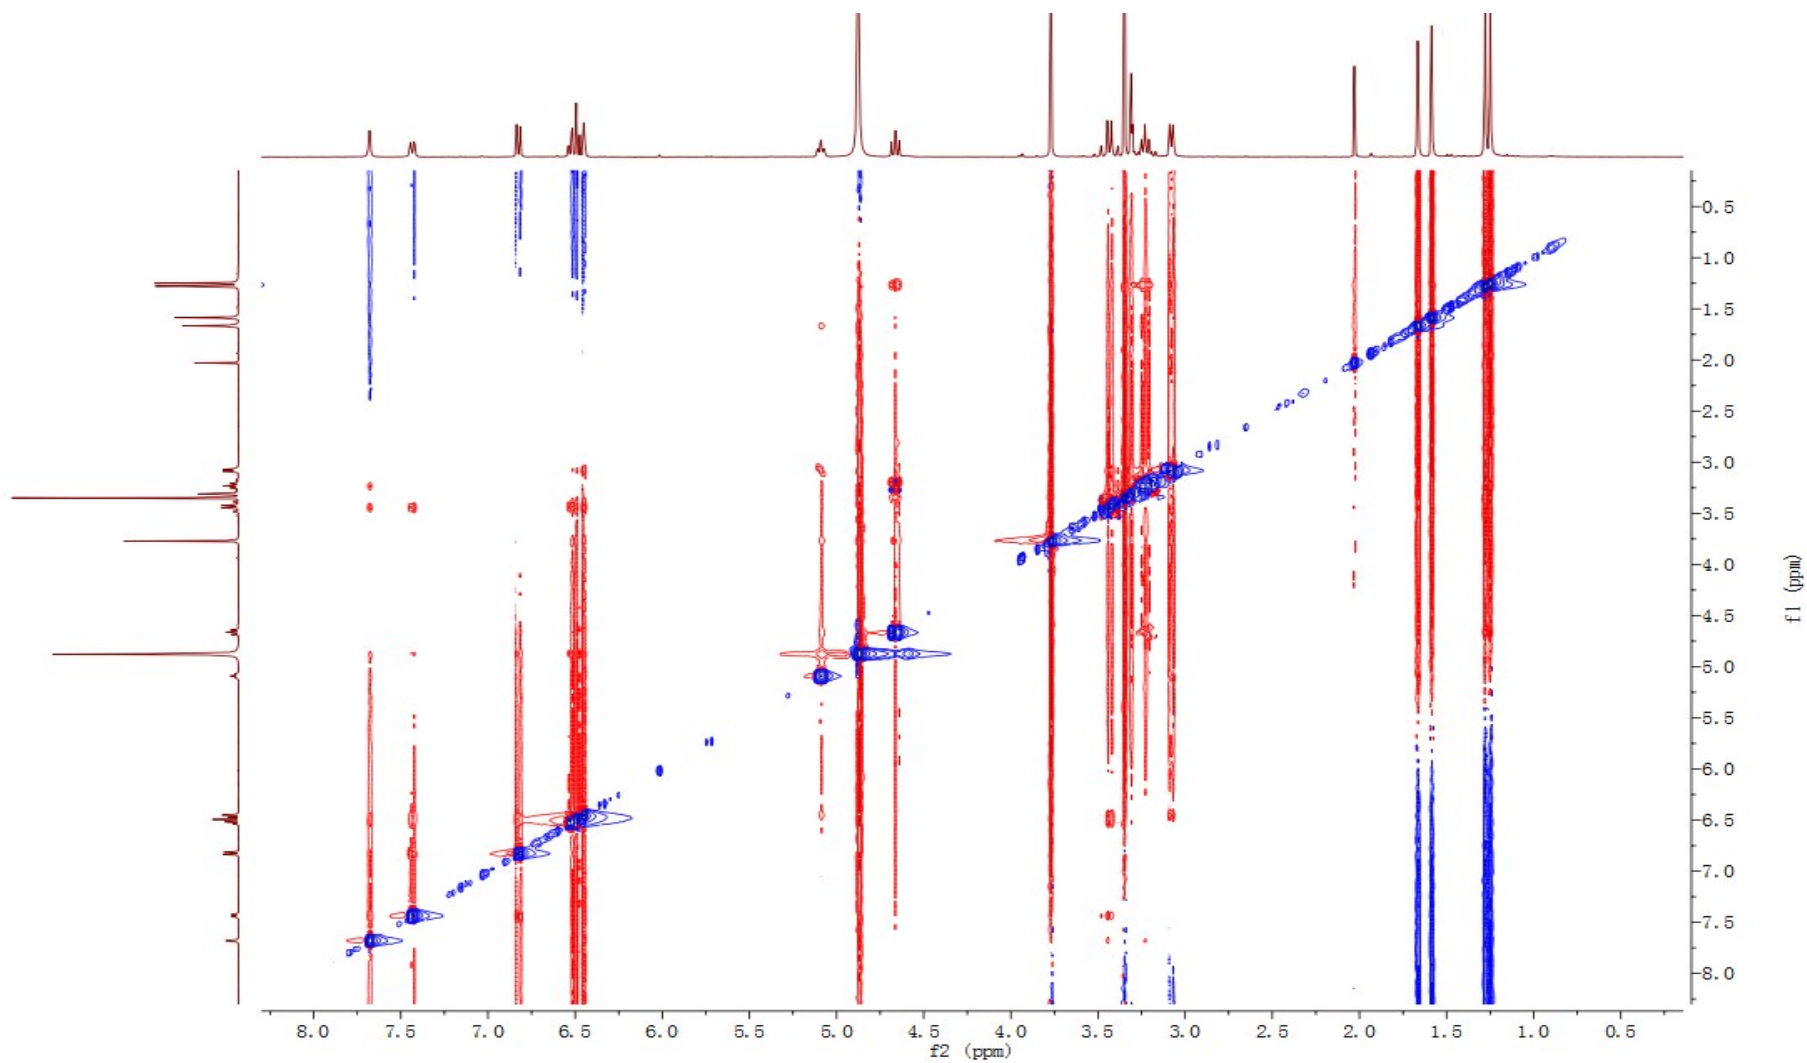

Figure S27. NOESY spectrum of compound **3** (Recorded in methanol- $d_4$ )

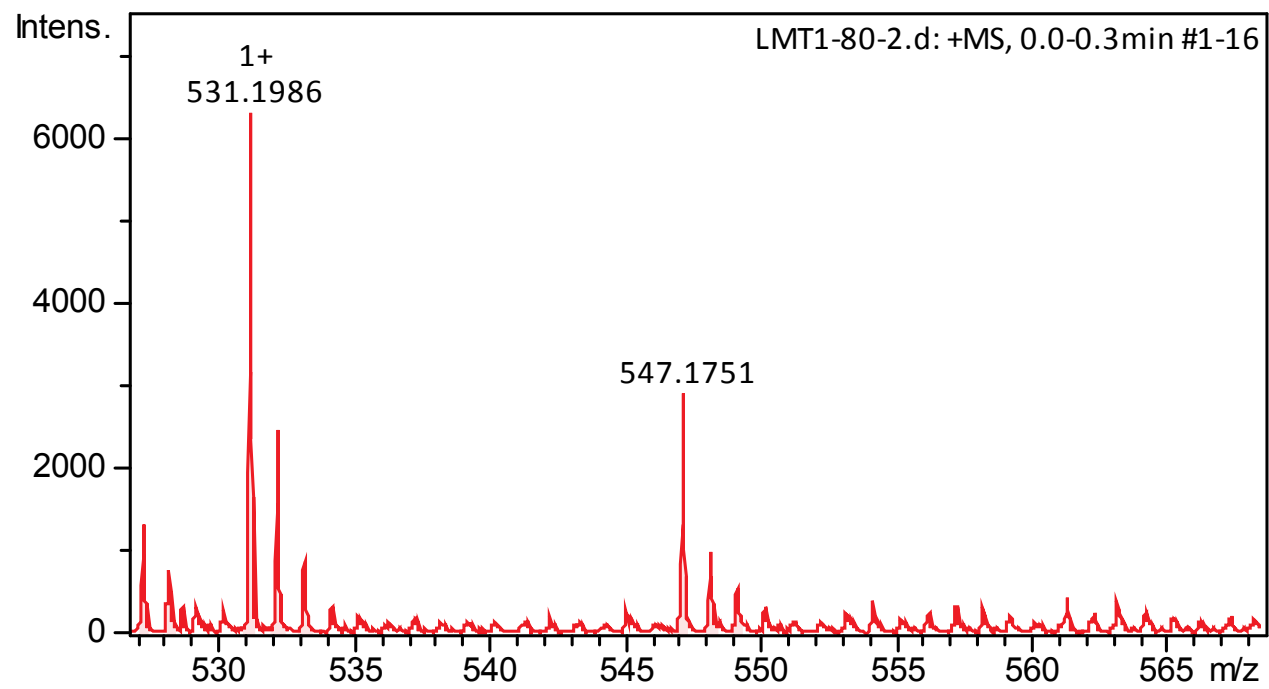

**Figure S28.** HRESIMS spectrum of compound **3**



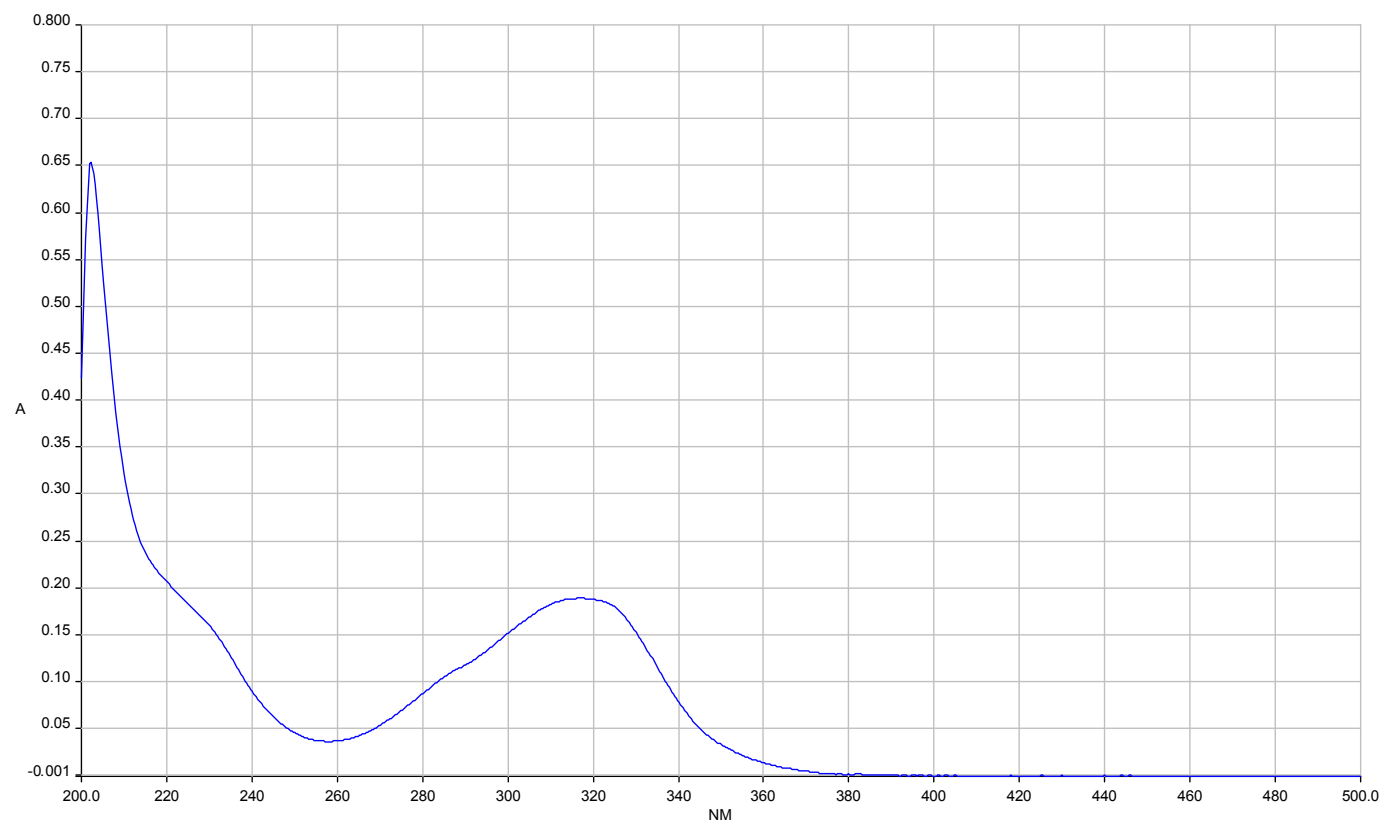

**Figure S29.** UV spectrum of compound **3**

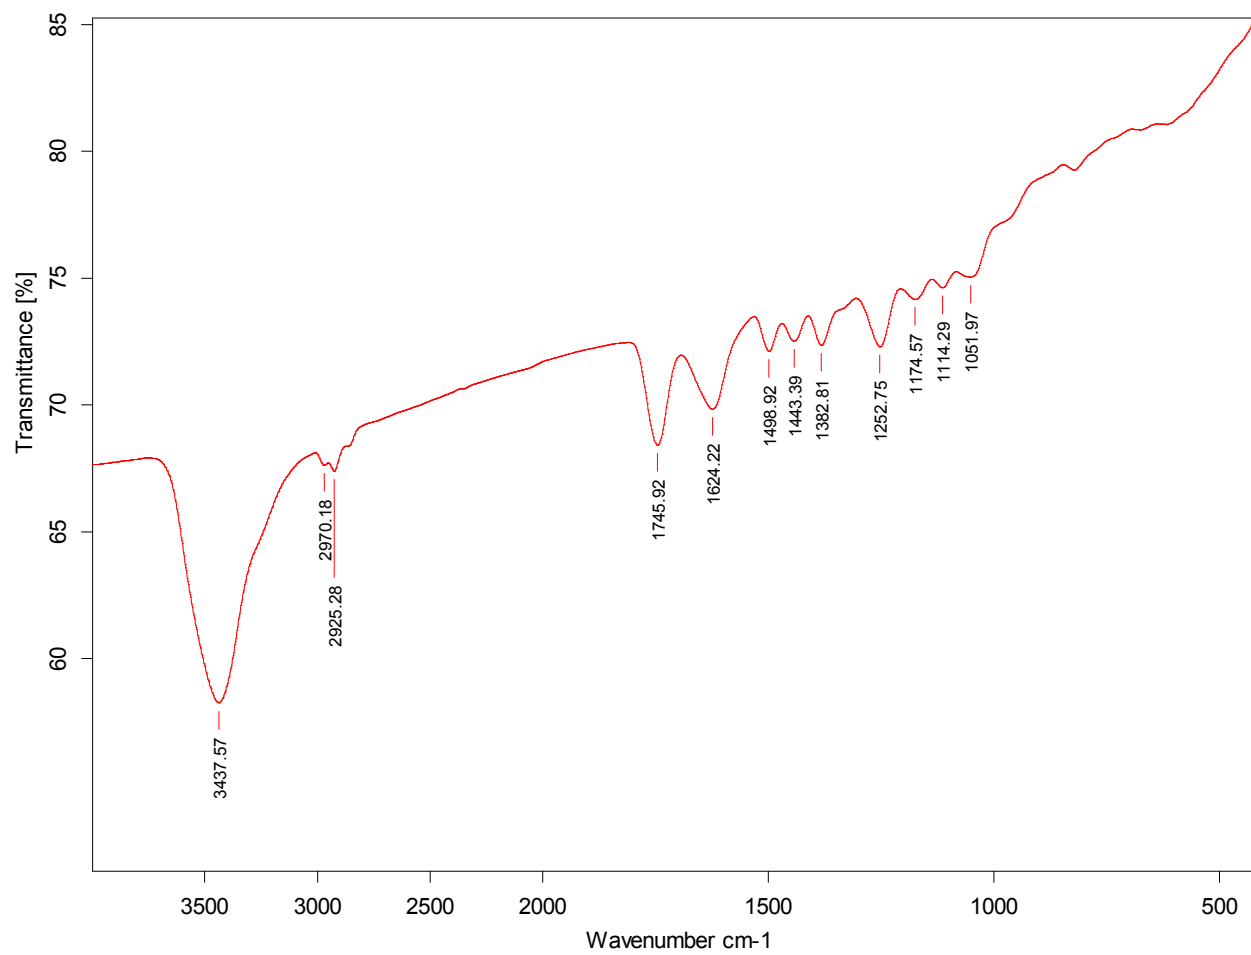

**Figure S30.** IR spectrum of compound **3**

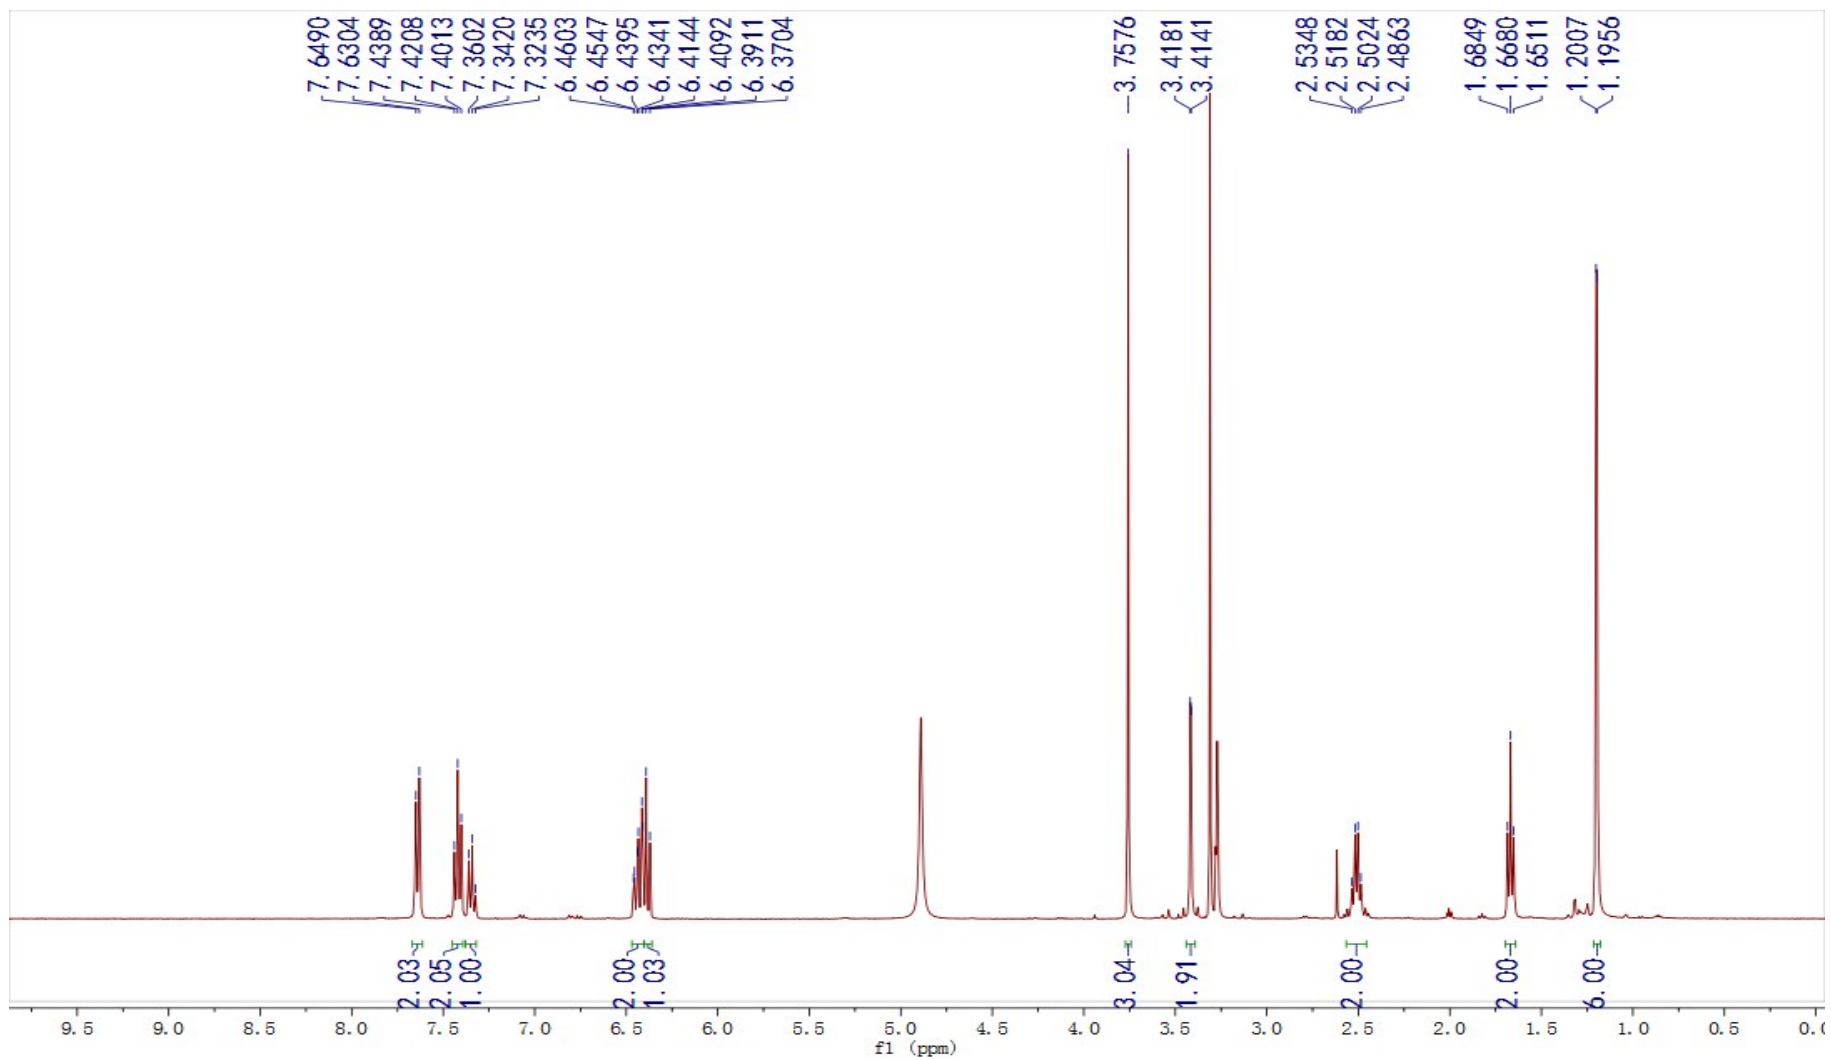

Figure S31.  $^1\text{H}$  NMR spectrum of compound 4 (Recorded in methanol- $d_4$ )

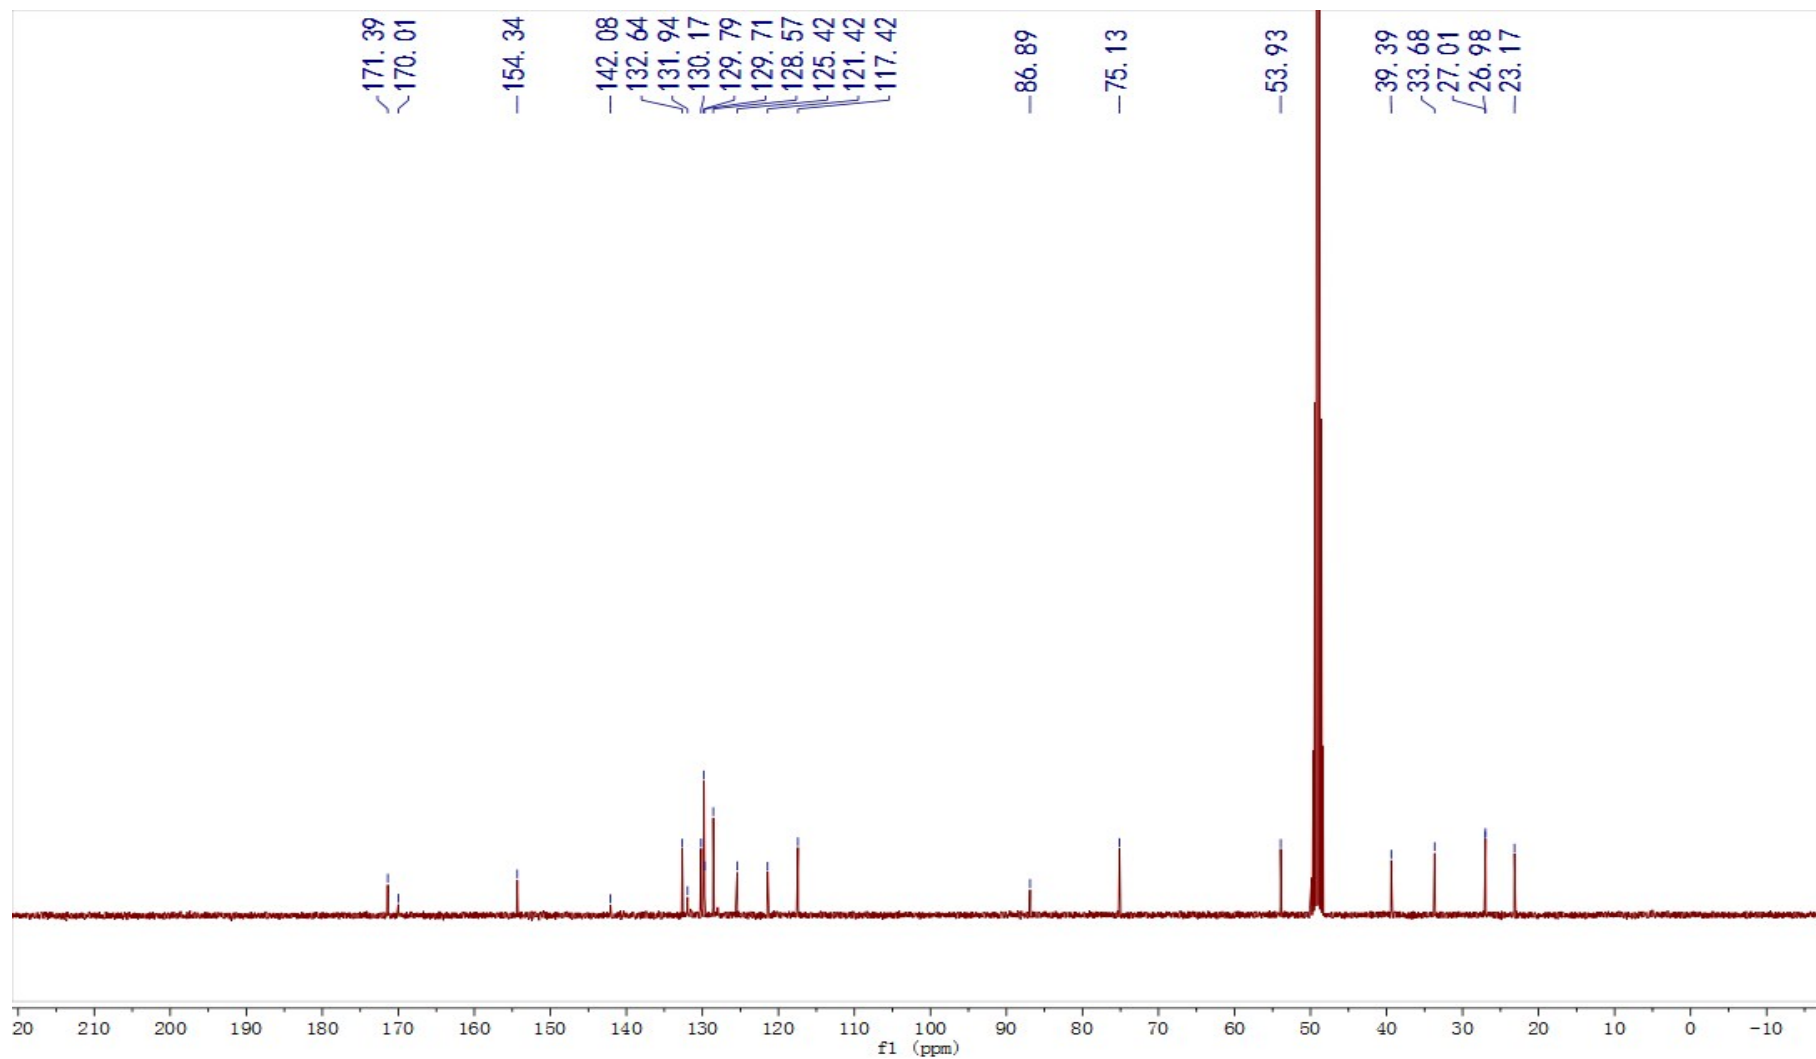

**Figure S32.**  $^{13}\text{C}$  NMR spectrum of compound 4 (Recorded in methanol- $d_4$ )

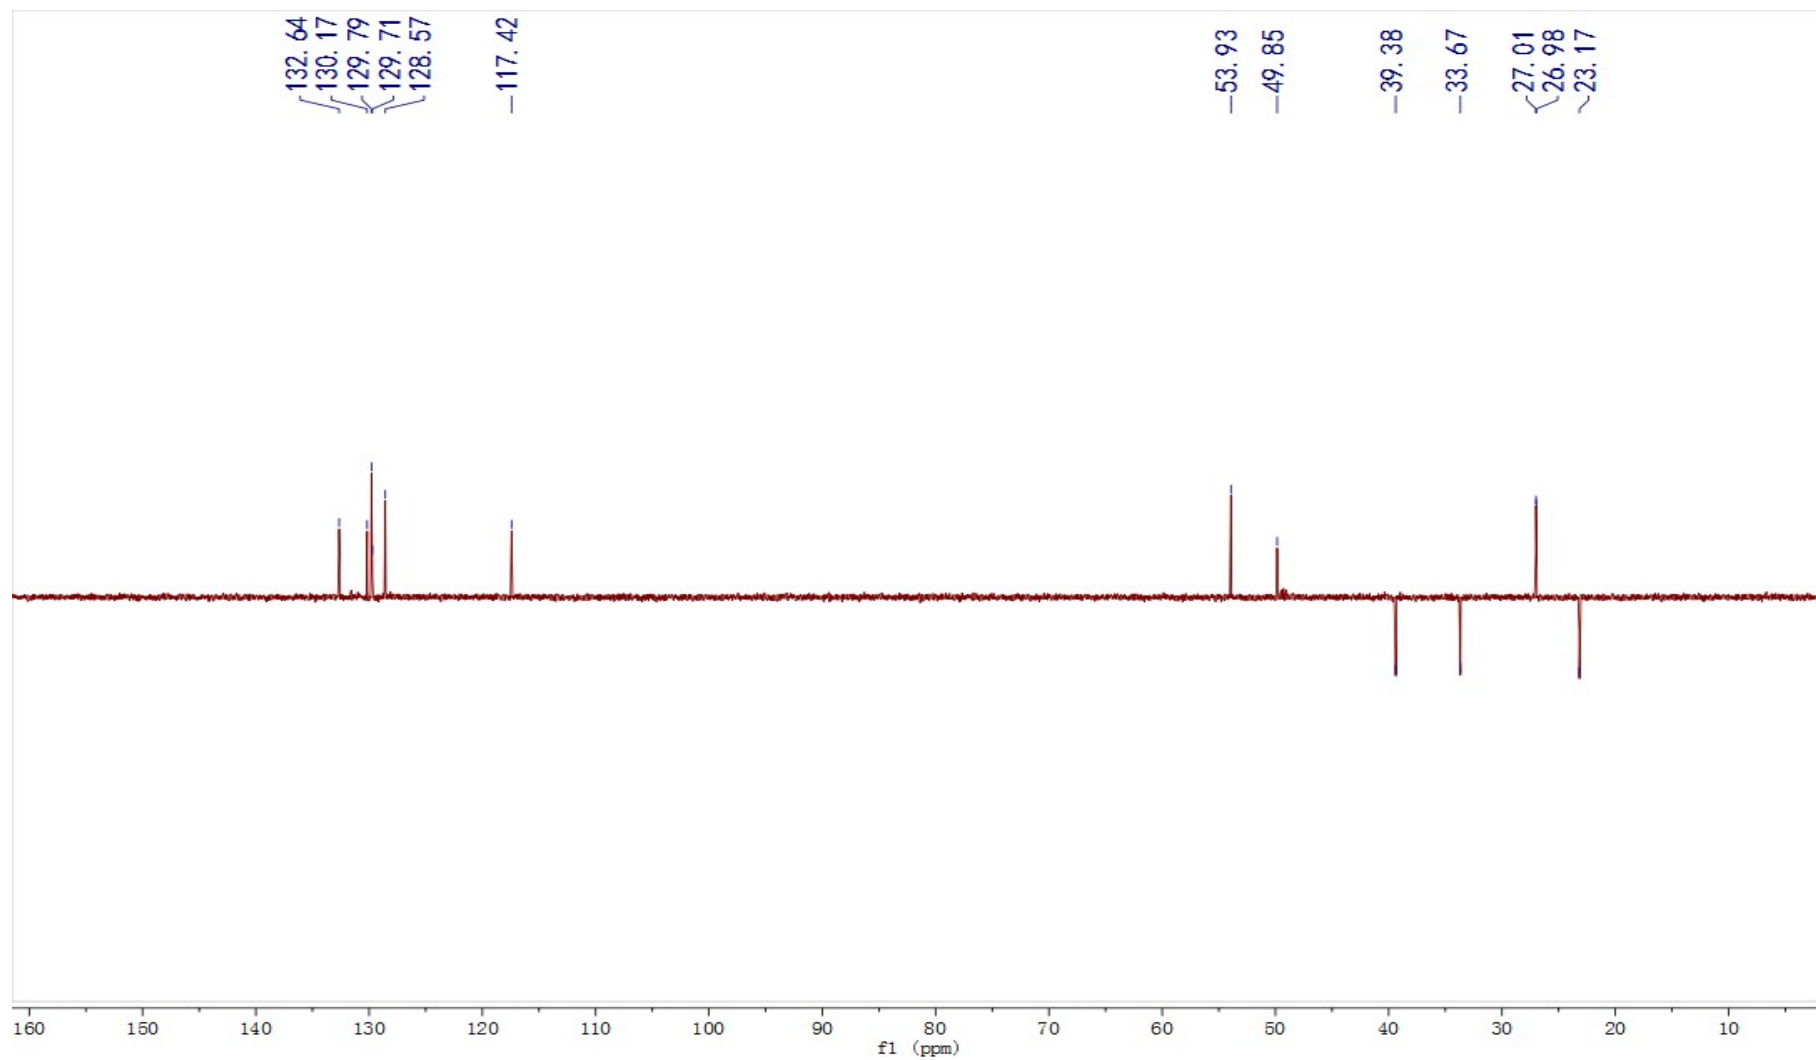

**Figure S33.** DEPT spectrum of compound **4** (Recorded in methanol- $d_4$ )

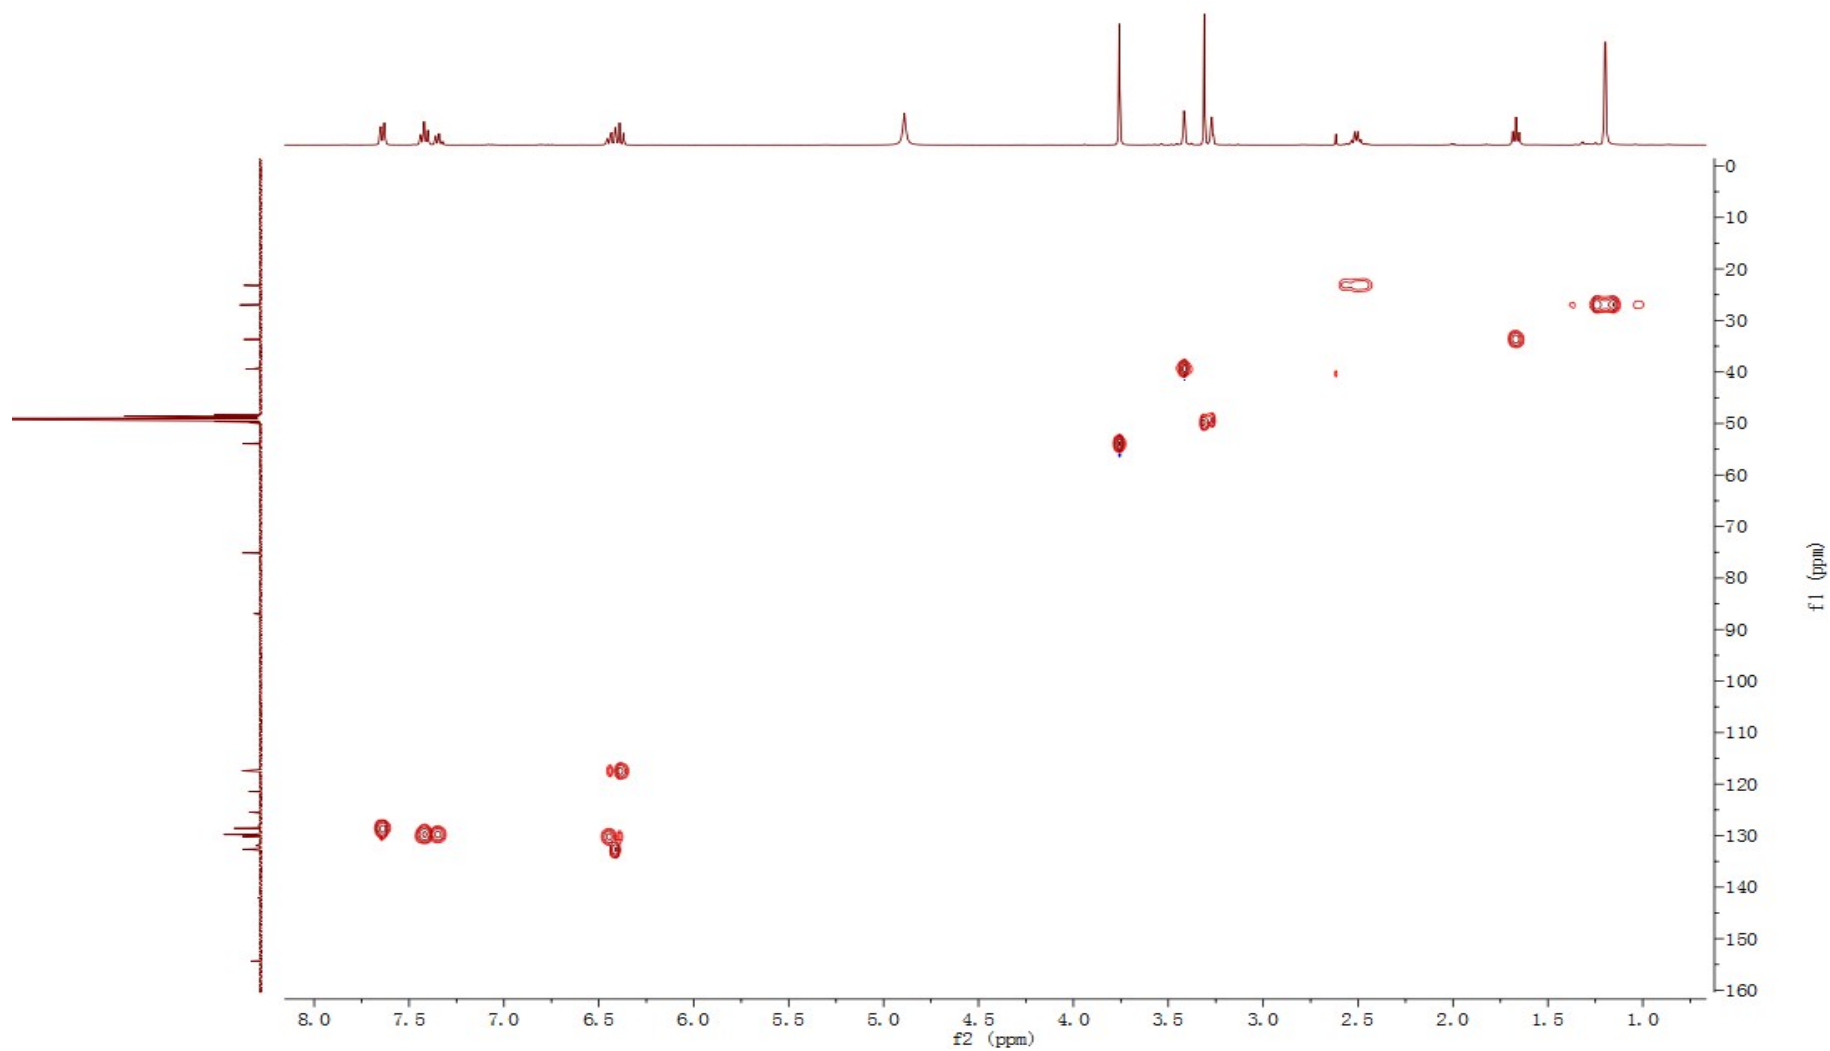

**Figure S34.** HSQC spectrum of compound **4** (Recorded in methanol- $d_4$ )

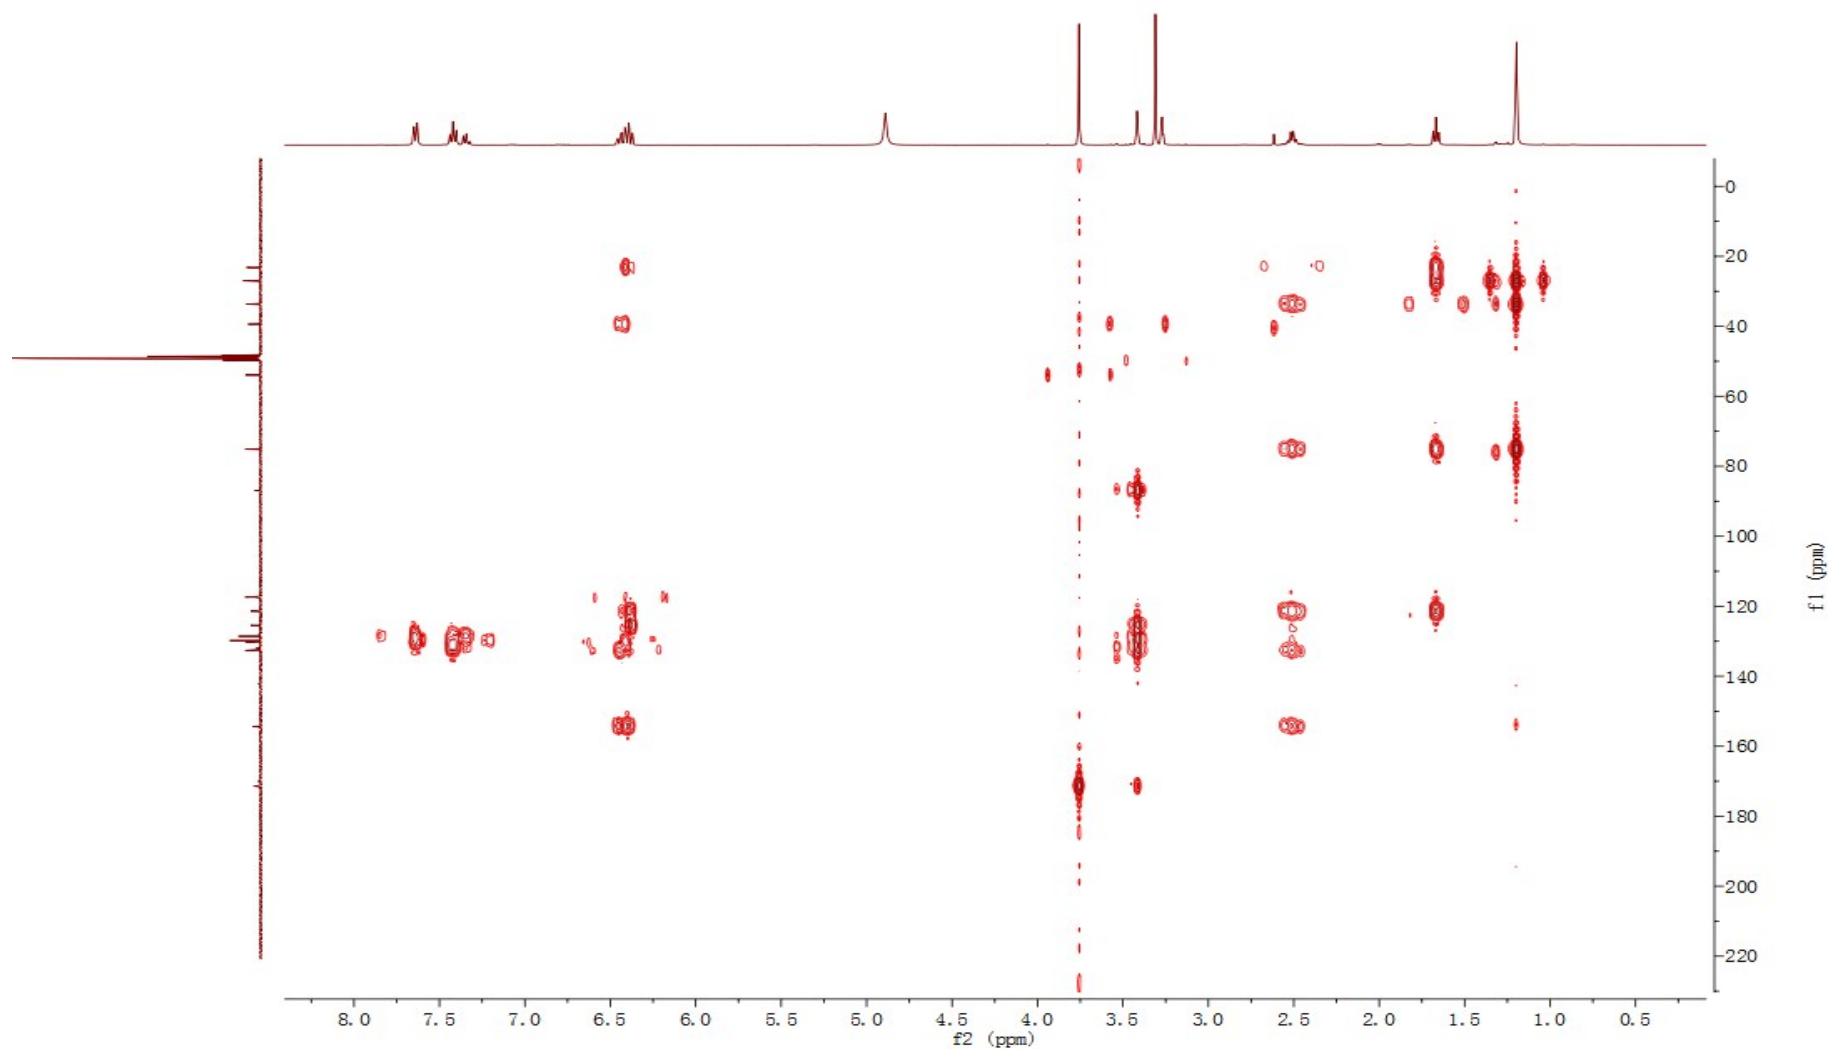

Figure S35. HMBC spectrum of compound 4 (Recorded in methanol- $d_4$ )

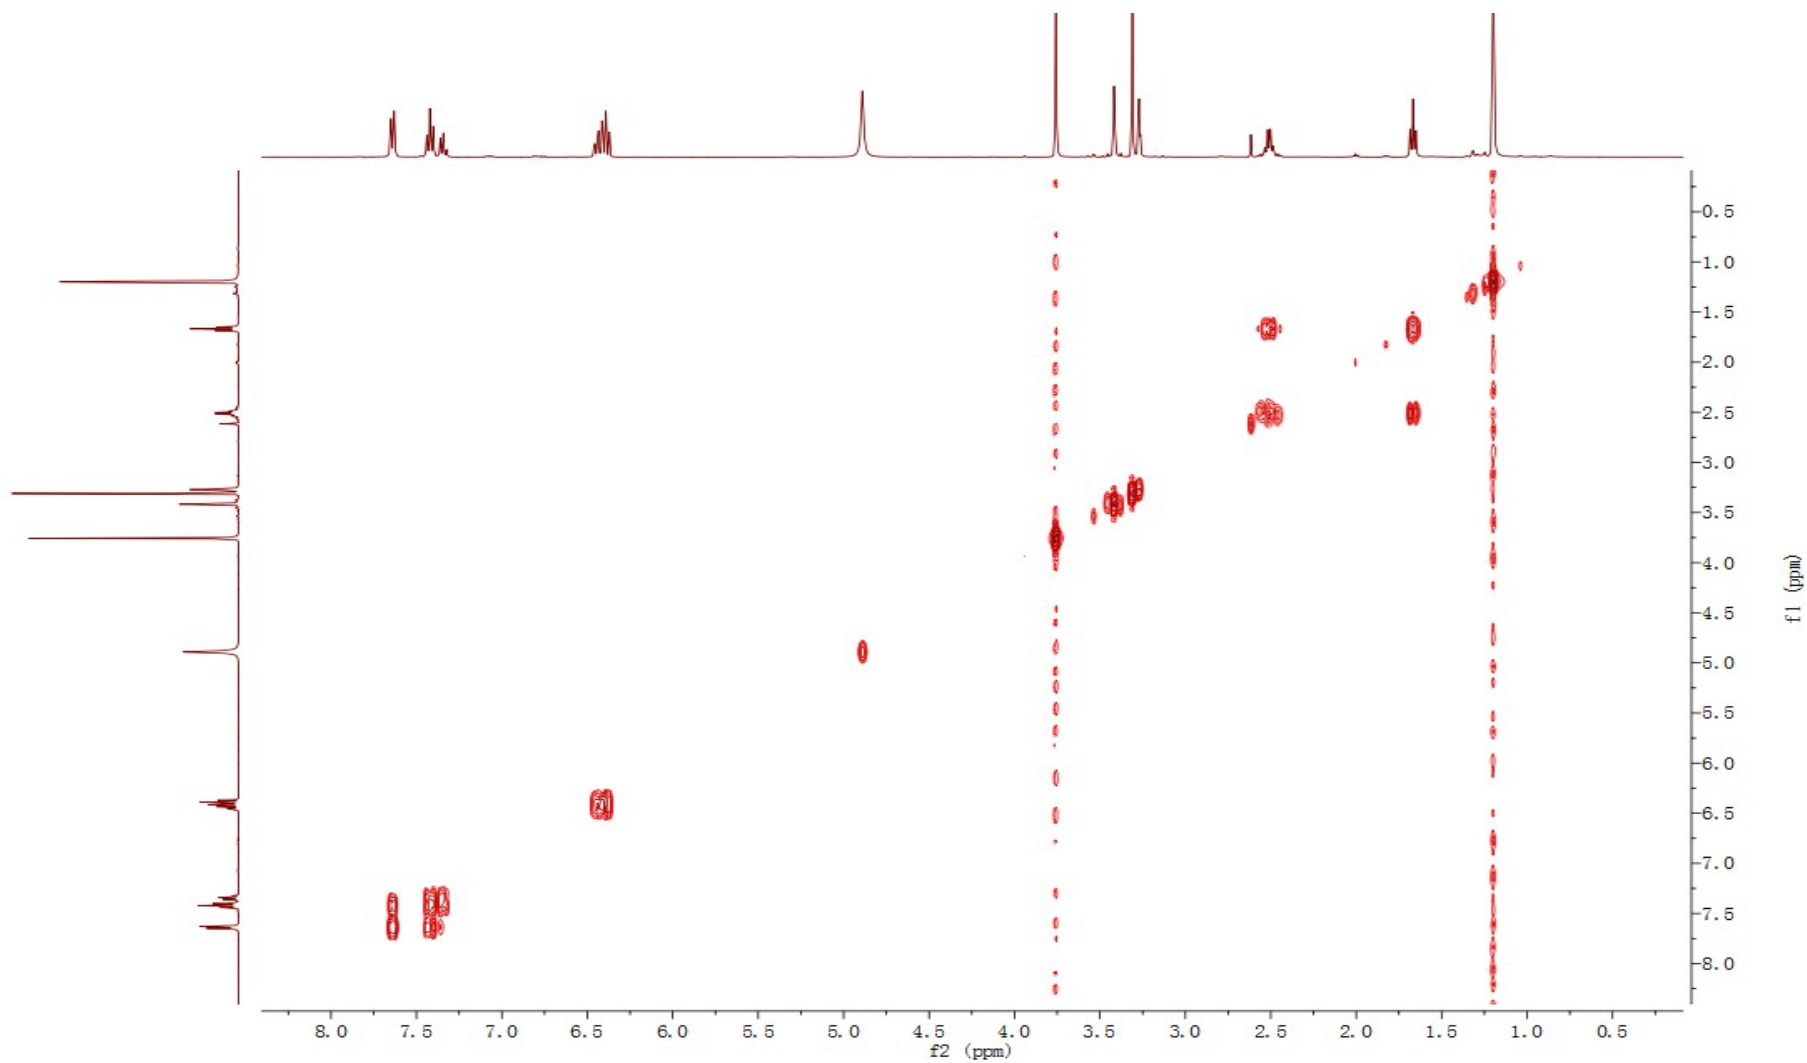



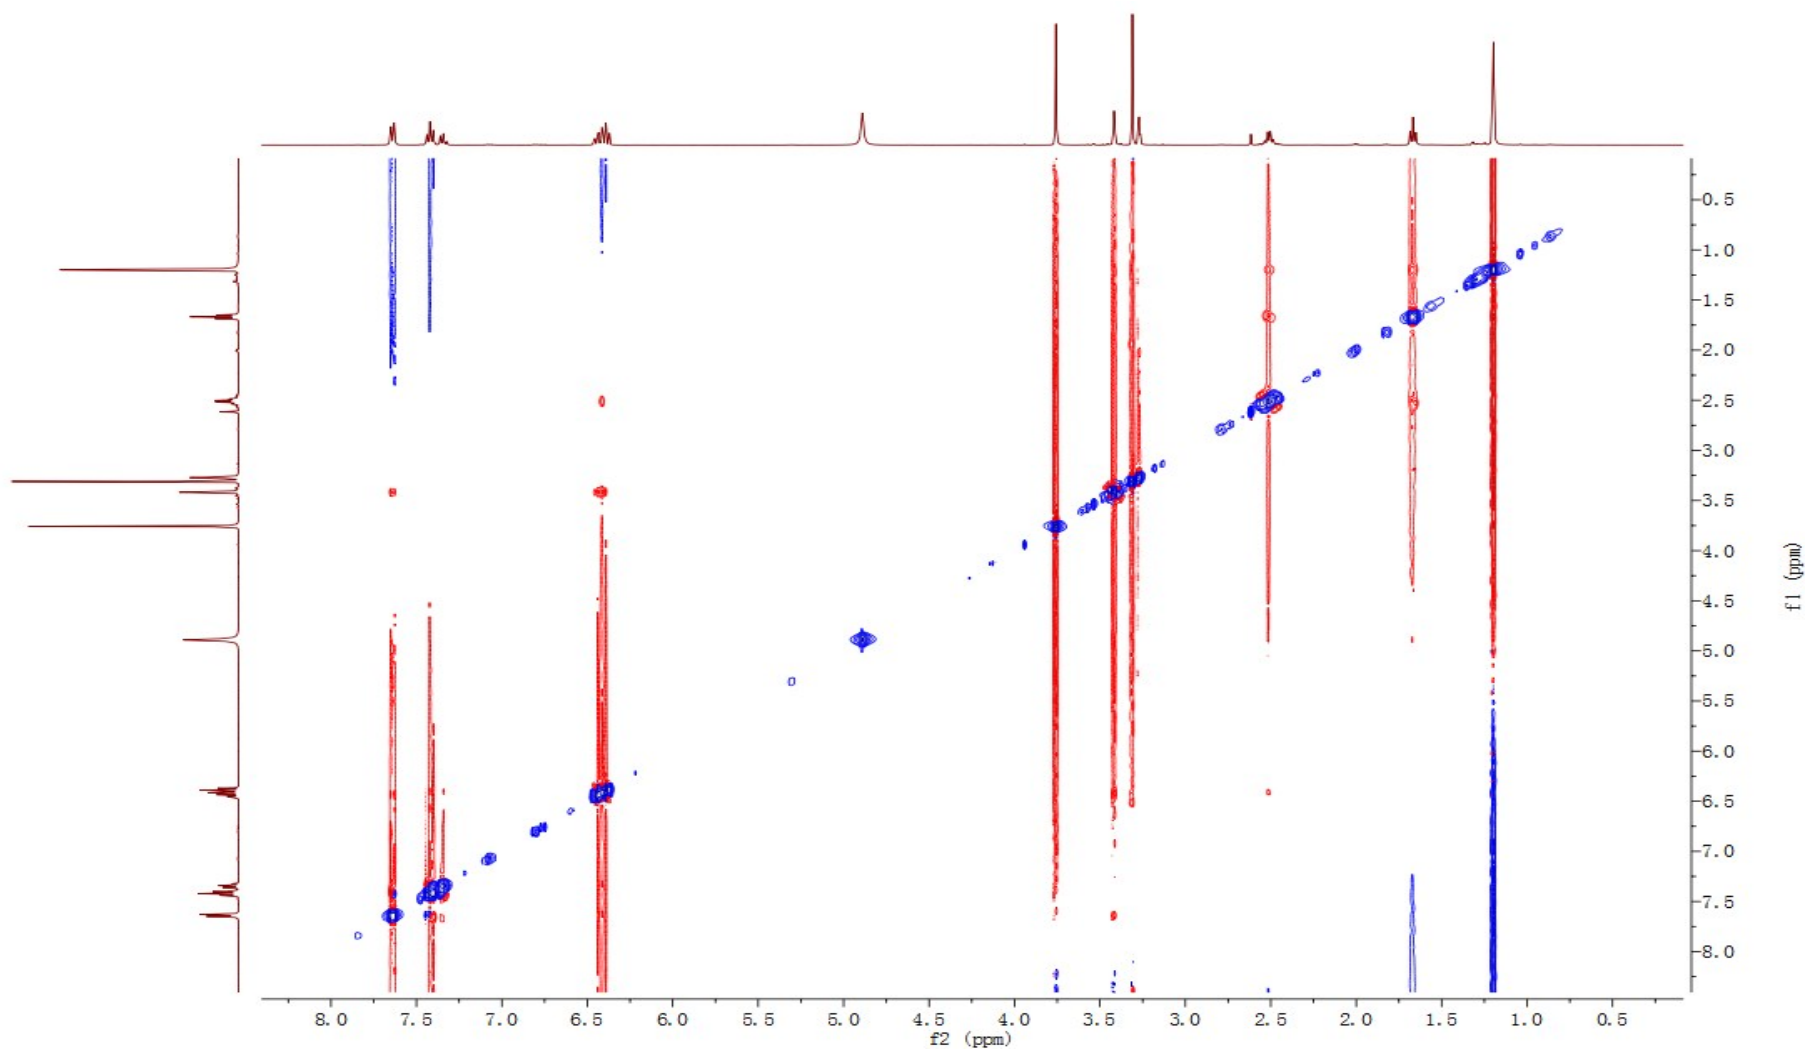

**Figure S37.** NOESY spectrum of compound **4** (Recorded in methanol- $d_4$ )

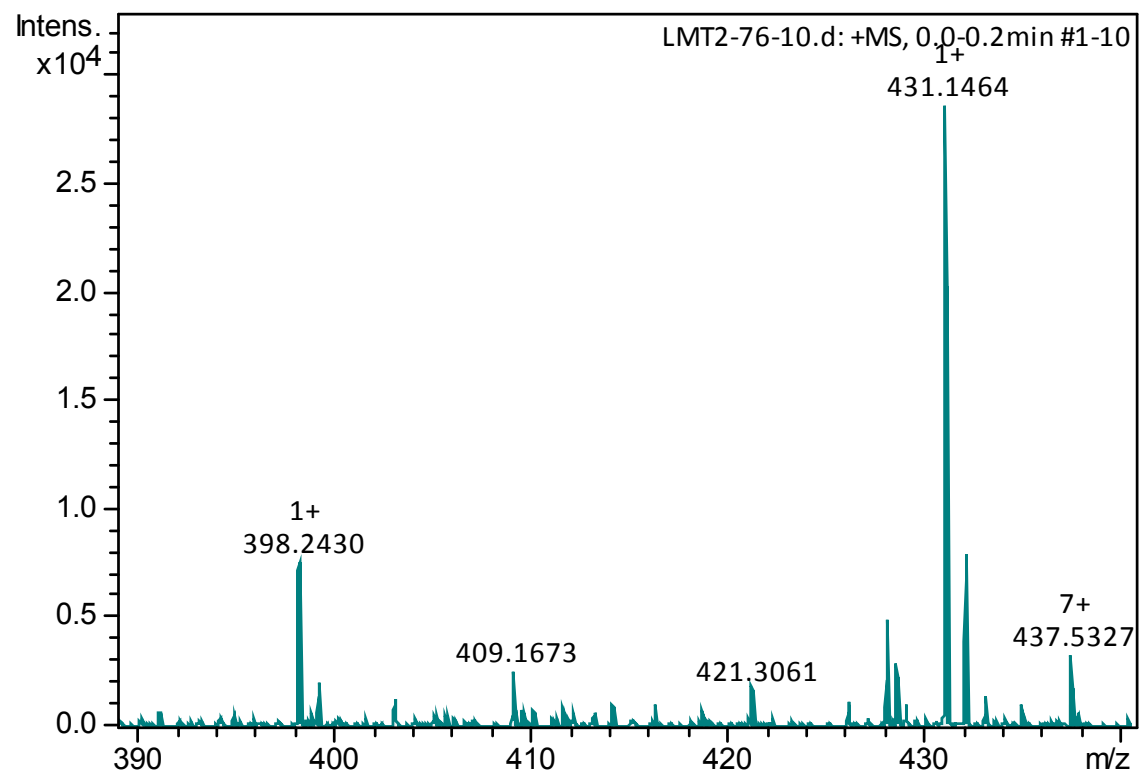

Figure S38. HRESIMS spectrum of compound 4

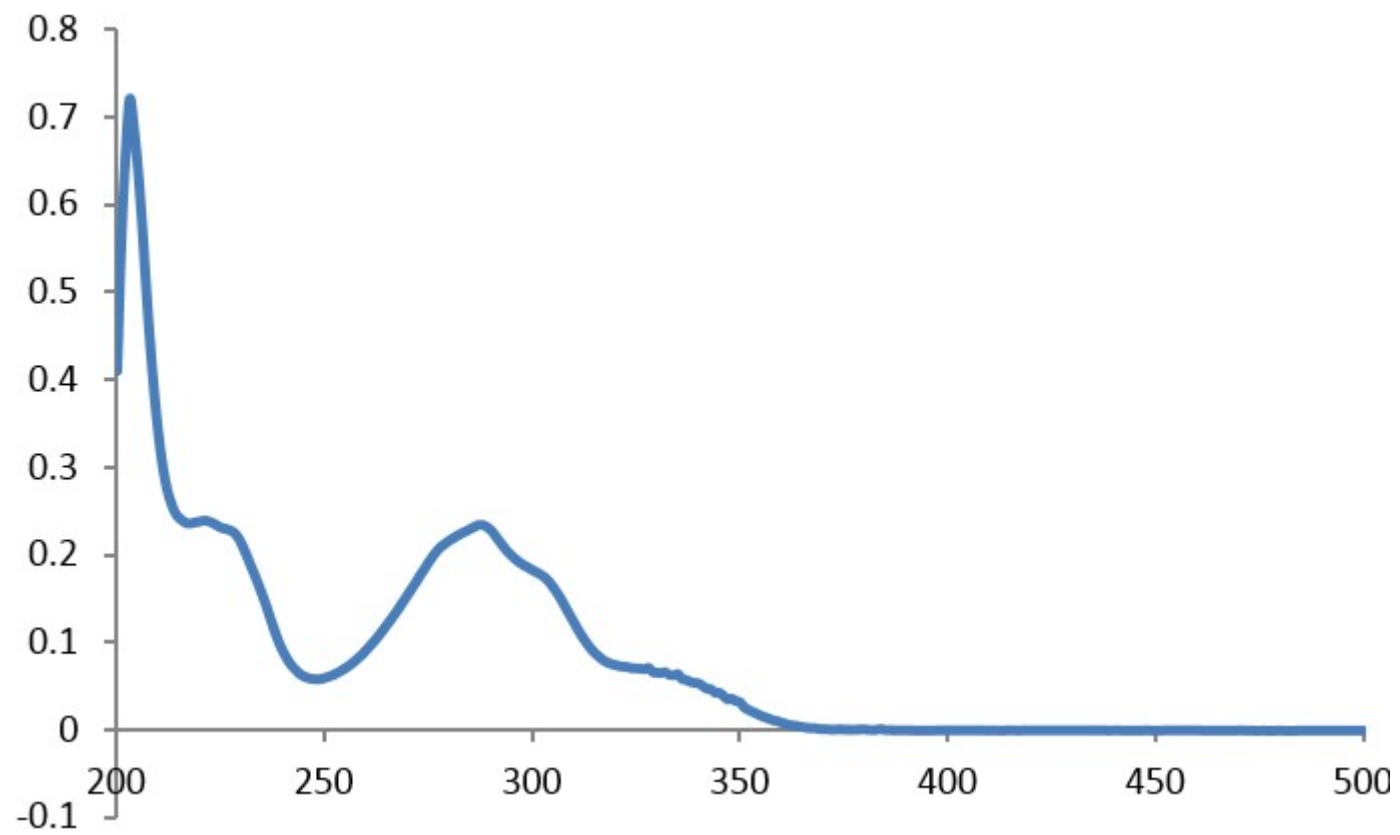

**Figure S39.** UV spectrum of compound 4

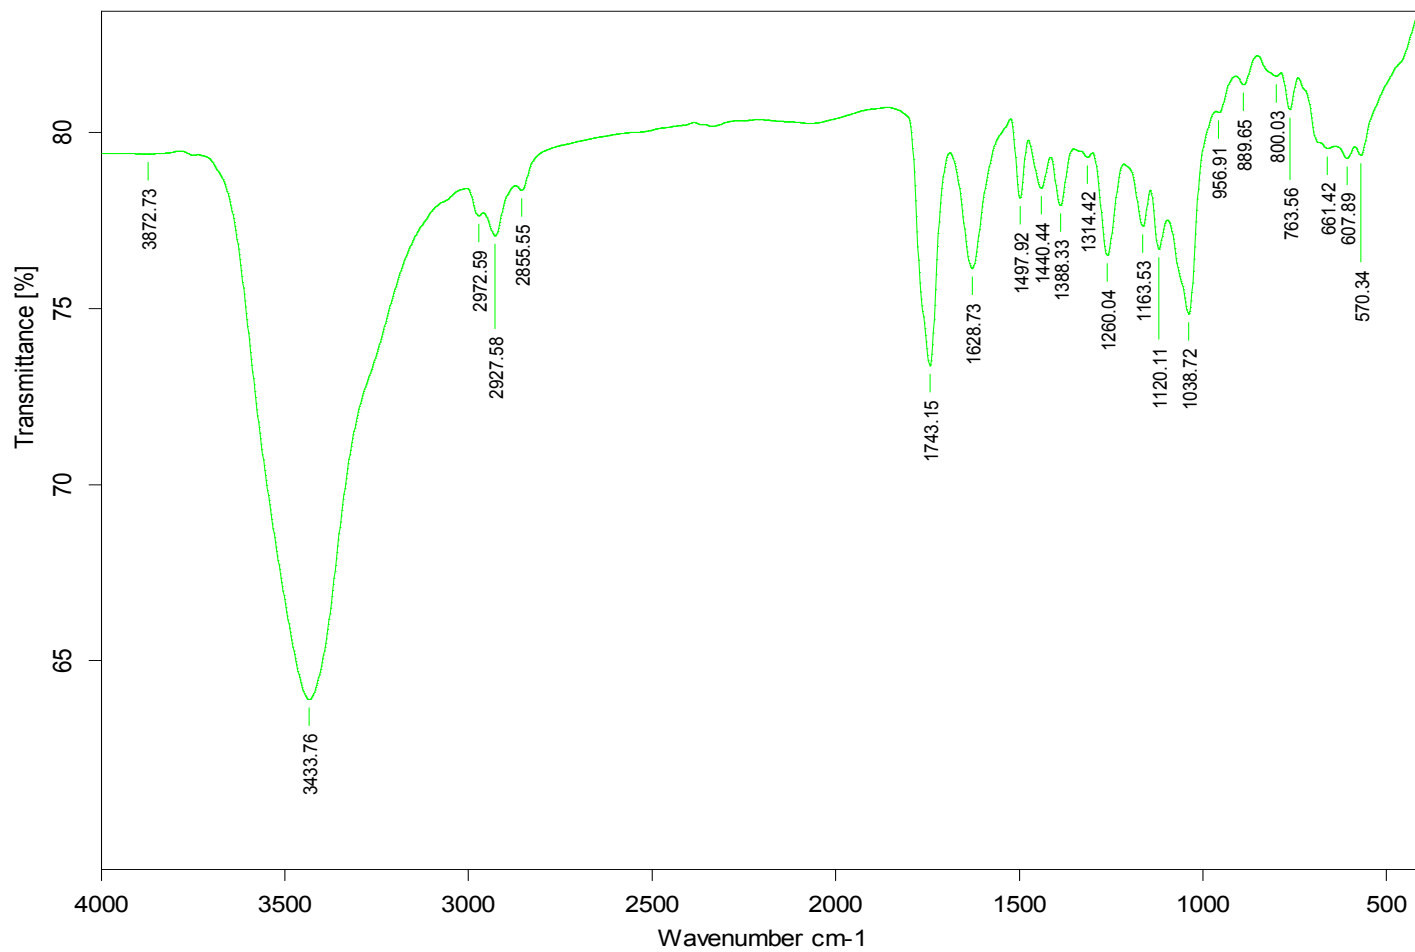

**Figure S40.** IR spectrum of compound **4**

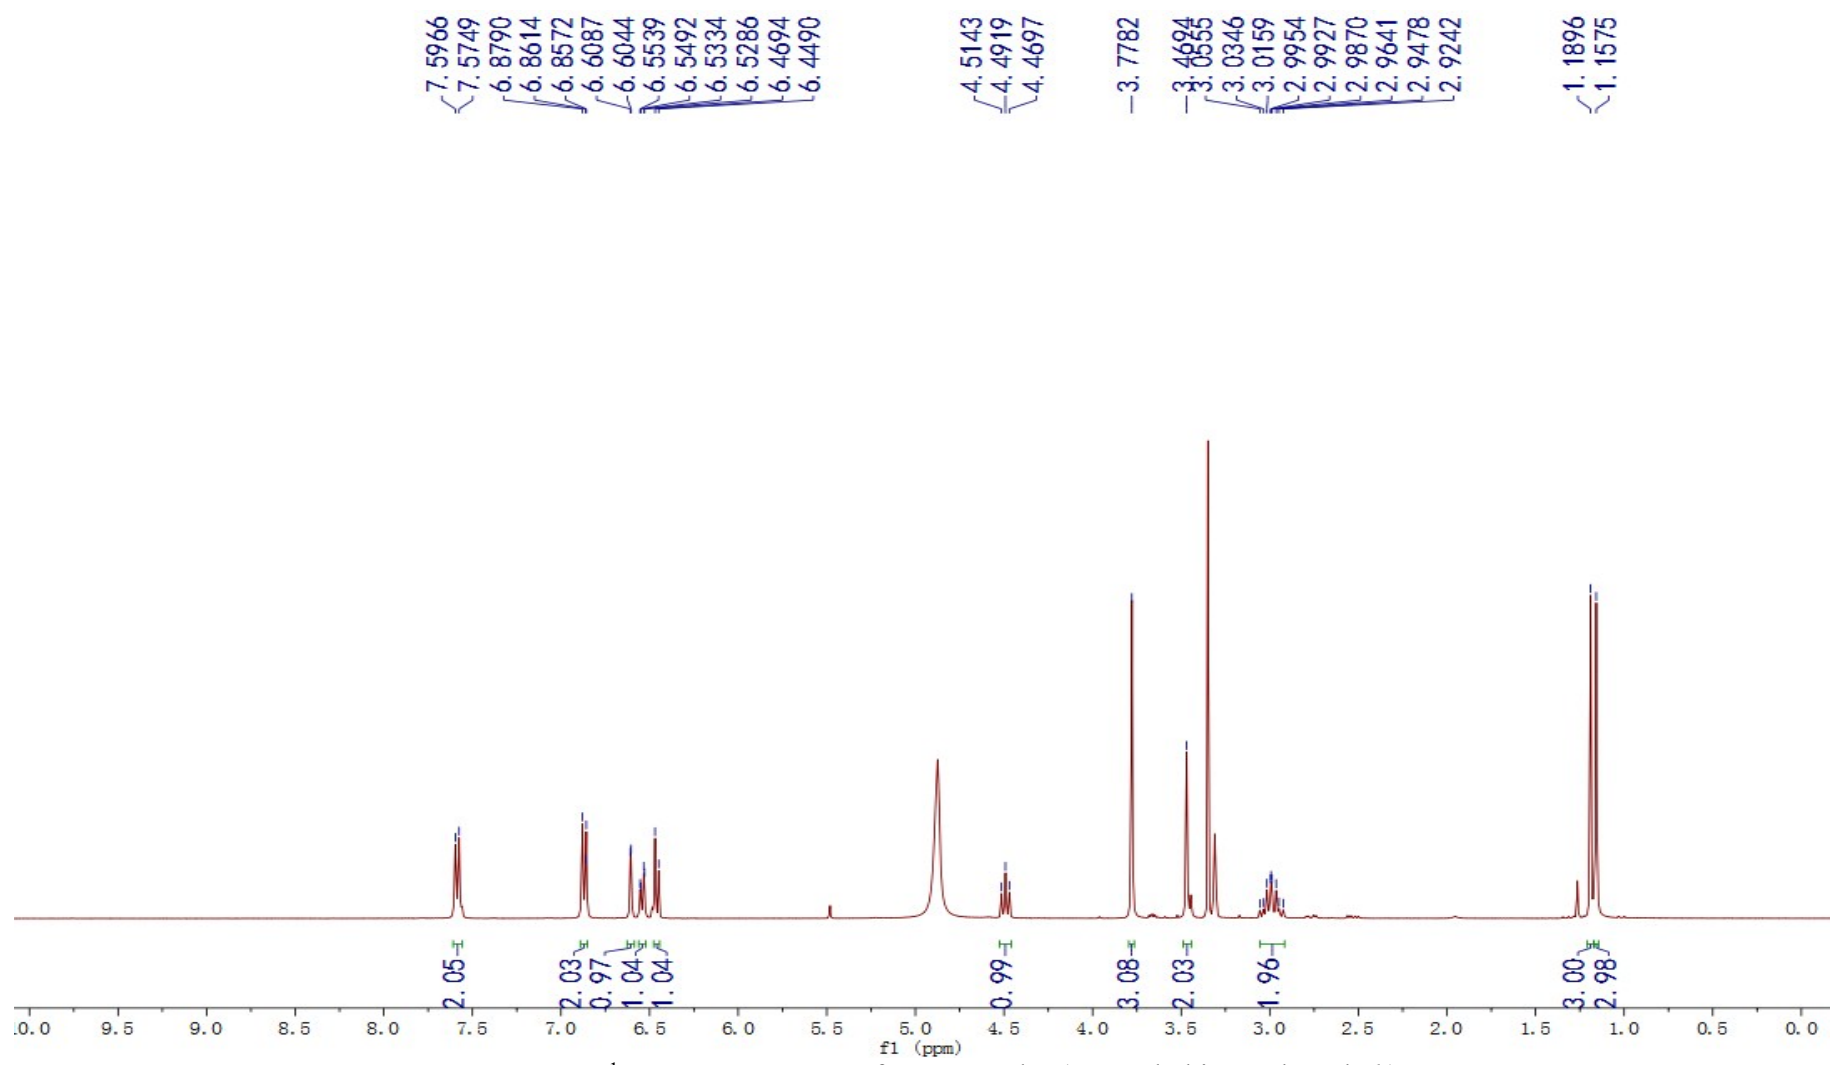

Figure S41. <sup>1</sup>H NMR spectrum of compound 5 (Recorded in methanol-*d*<sub>4</sub>)

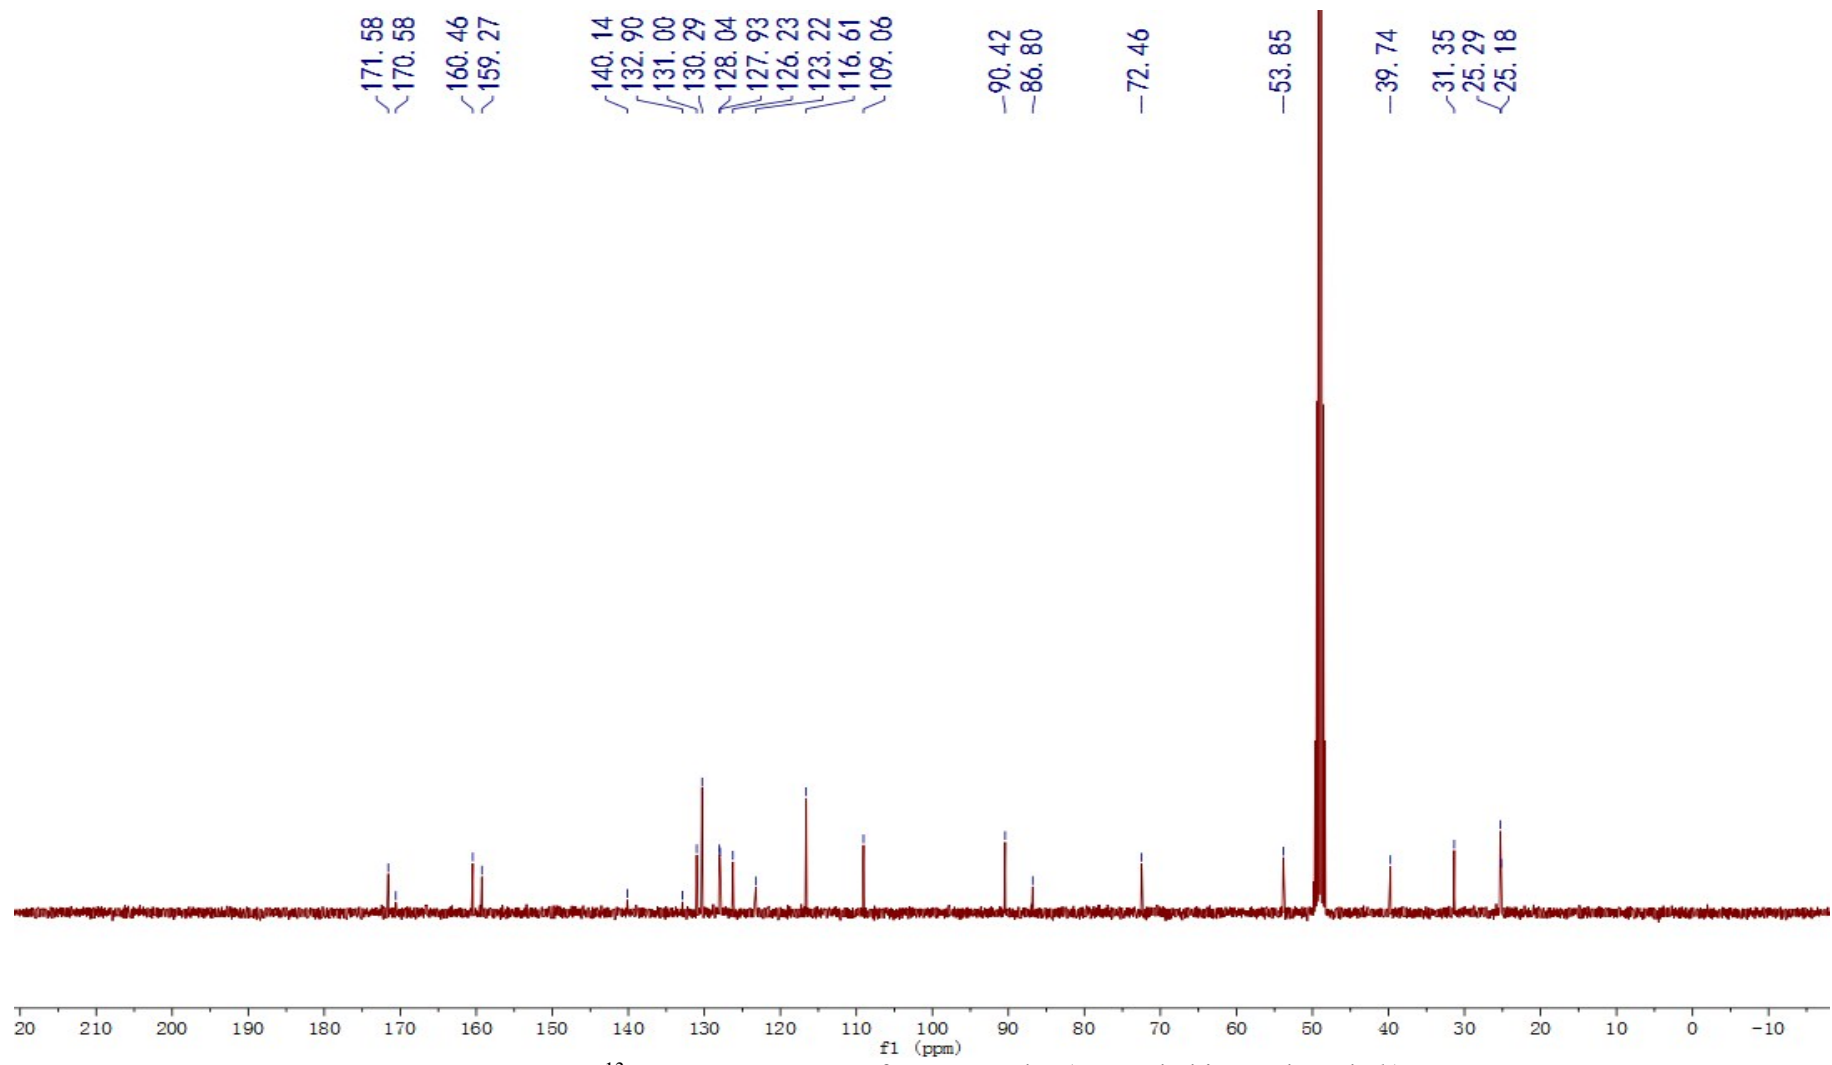

Figure S42. <sup>13</sup>C NMR spectrum of compound **5** (Recorded in methanol-*d*<sub>4</sub>)

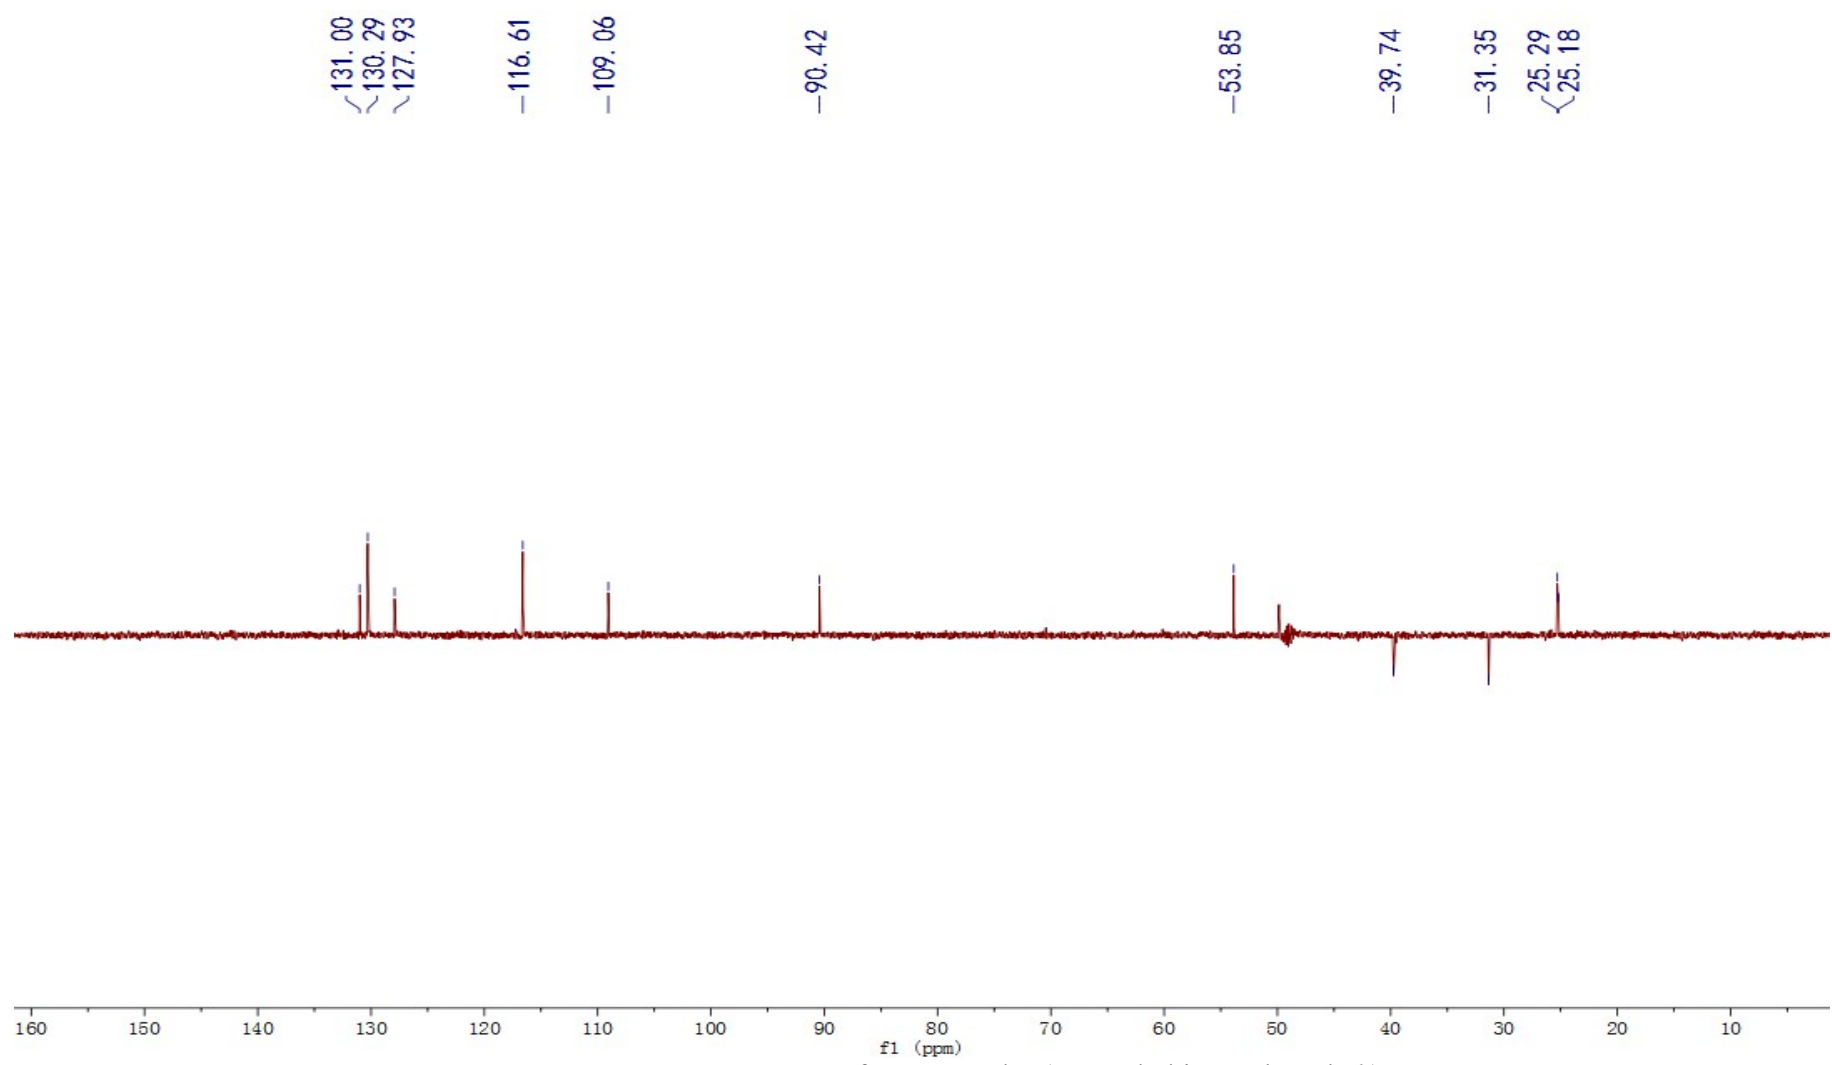

Figure S43. DEPT spectrum of compound 5 (Recorded in methanol- $d_4$ )

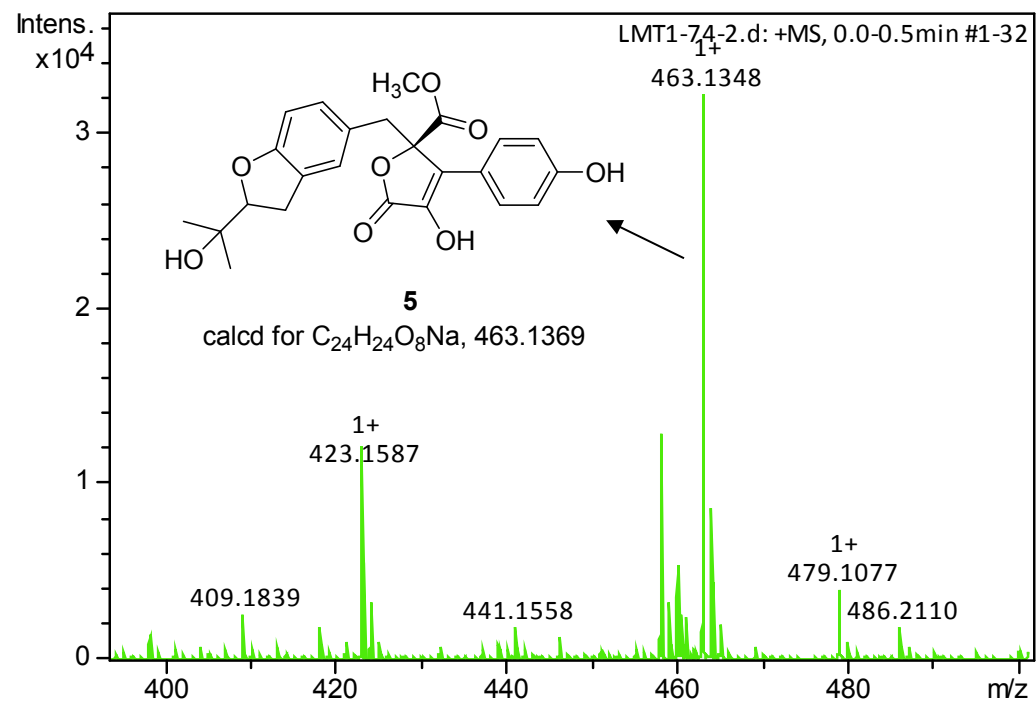

Figure S44. HRESIMS spectrum of compound **5**



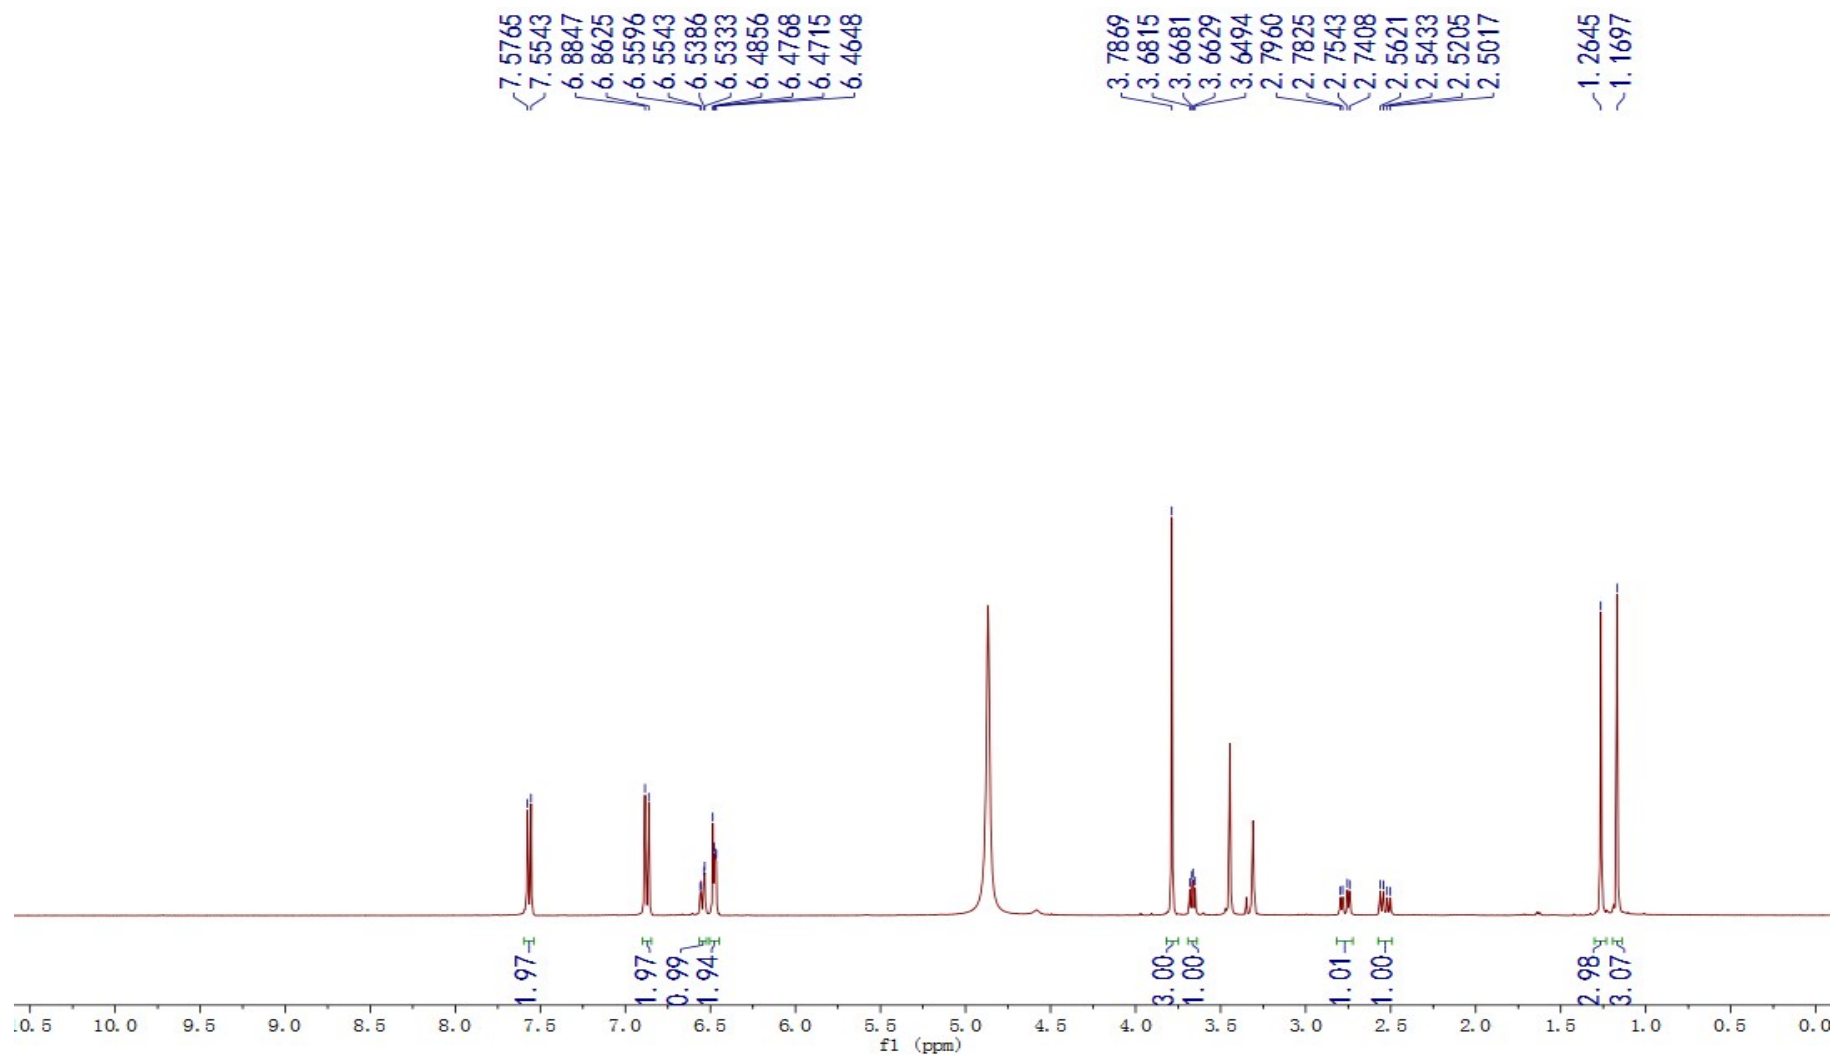

Figure S45. <sup>1</sup>H NMR spectrum of compound 7 (Recorded in methanol-*d*<sub>4</sub>)

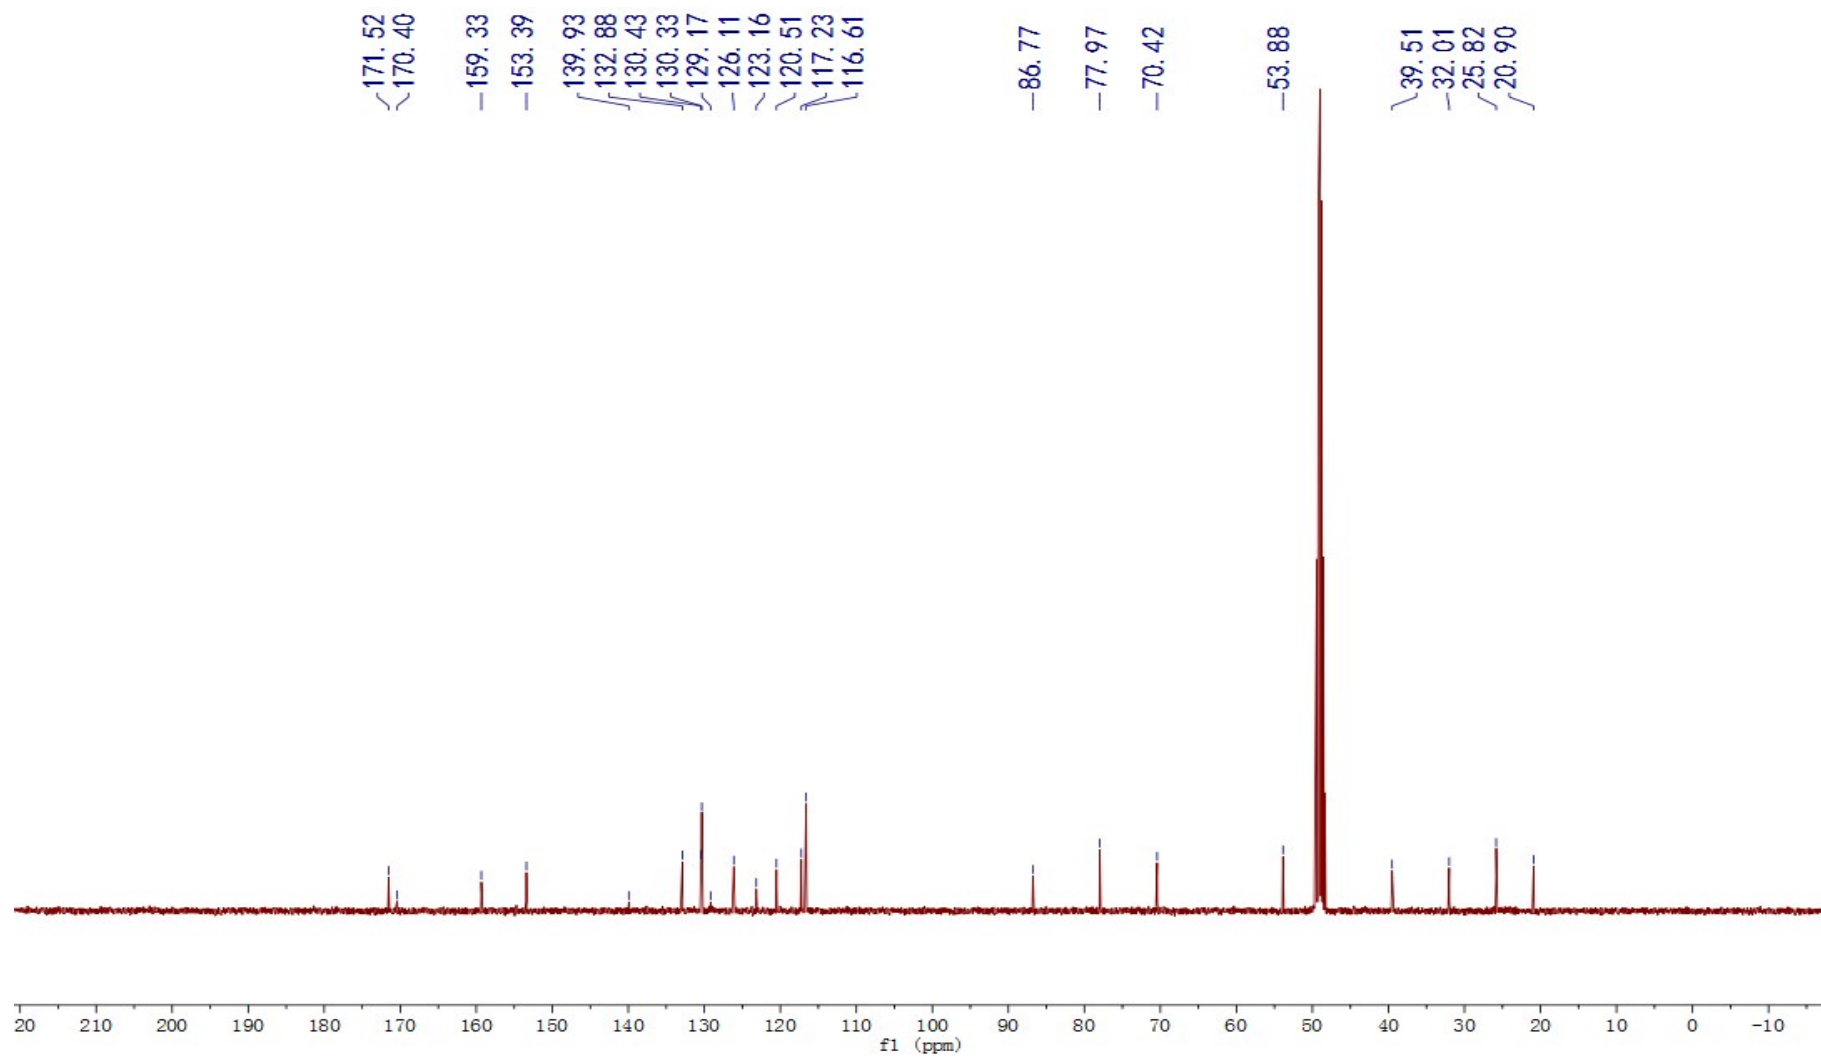

**Figure S46.**  $^{13}\text{C}$  NMR spectrum of compound **7** (Recorded in methanol- $d_4$ )

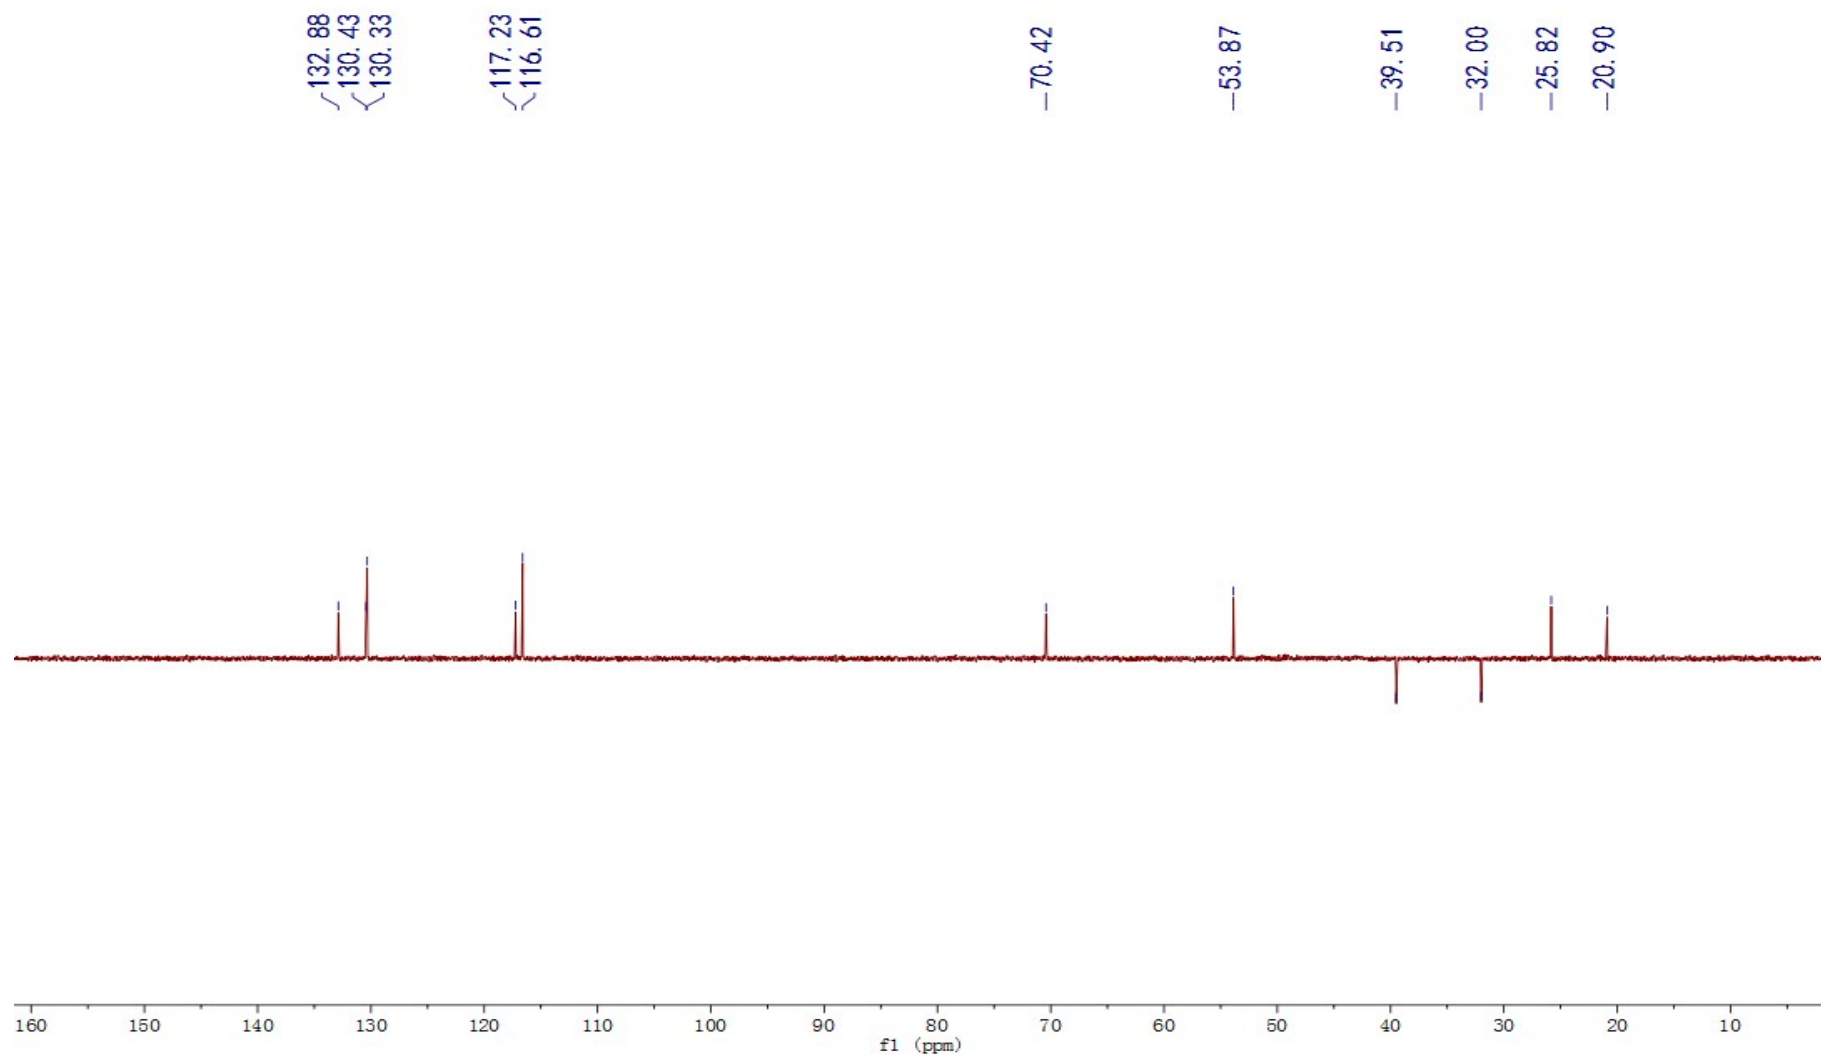

**Figure S47.** DEPT spectrum of compound 7 (Recorded in methanol- $d_4$ )

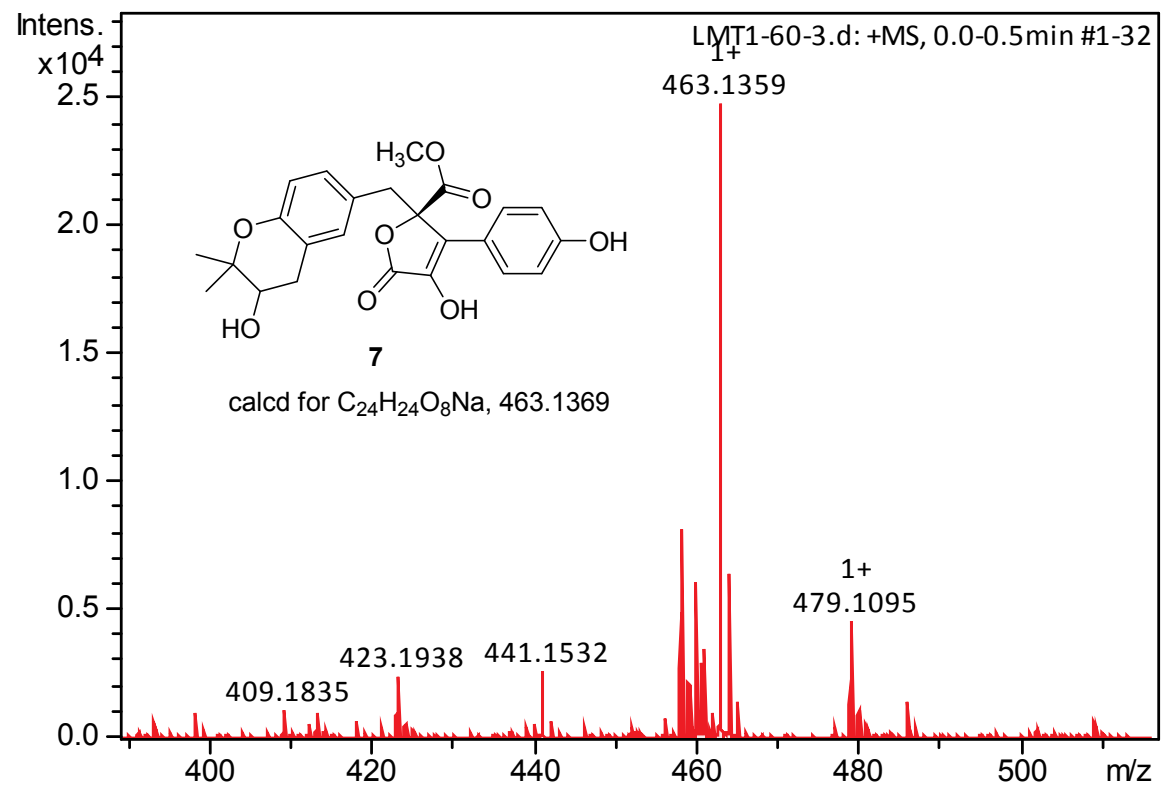

Figure S48. HRESIMS spectrum of compound 7

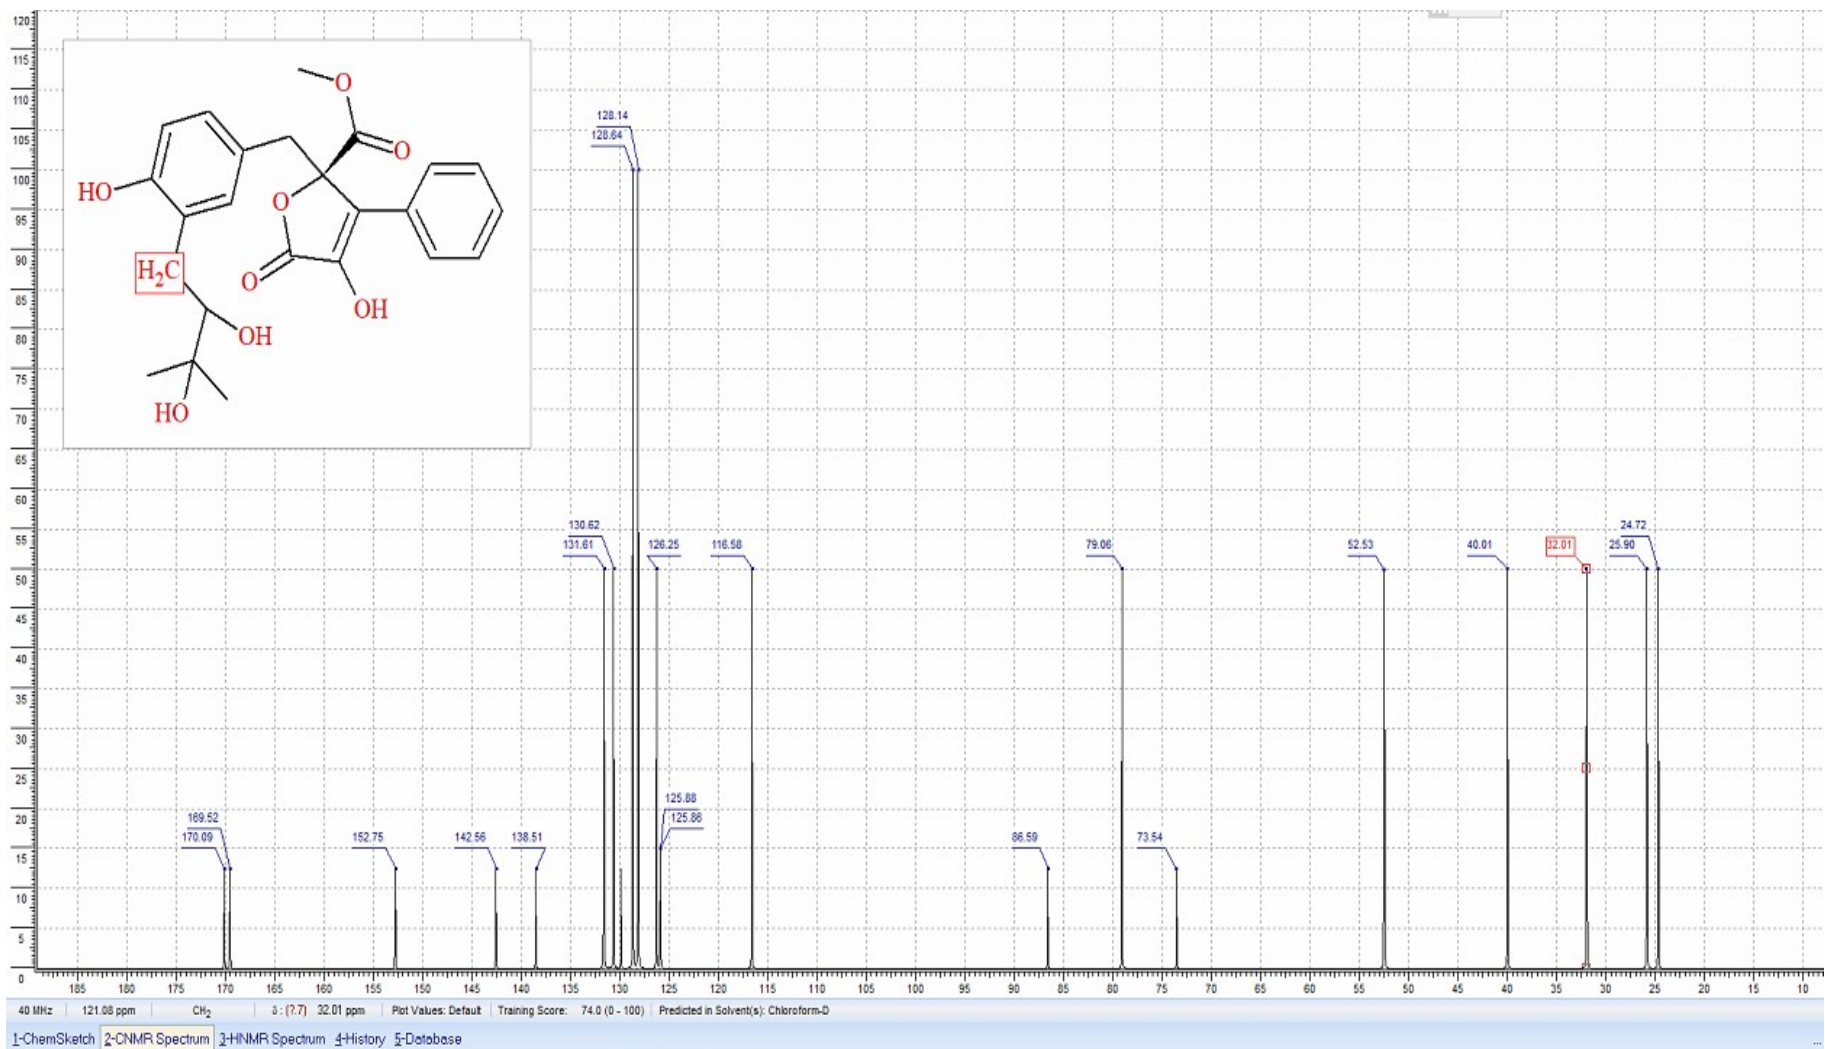

Figure S49.  $^{13}\text{C}$  NMR prediction at C-7'' for compound 1 by ACD/Labs software

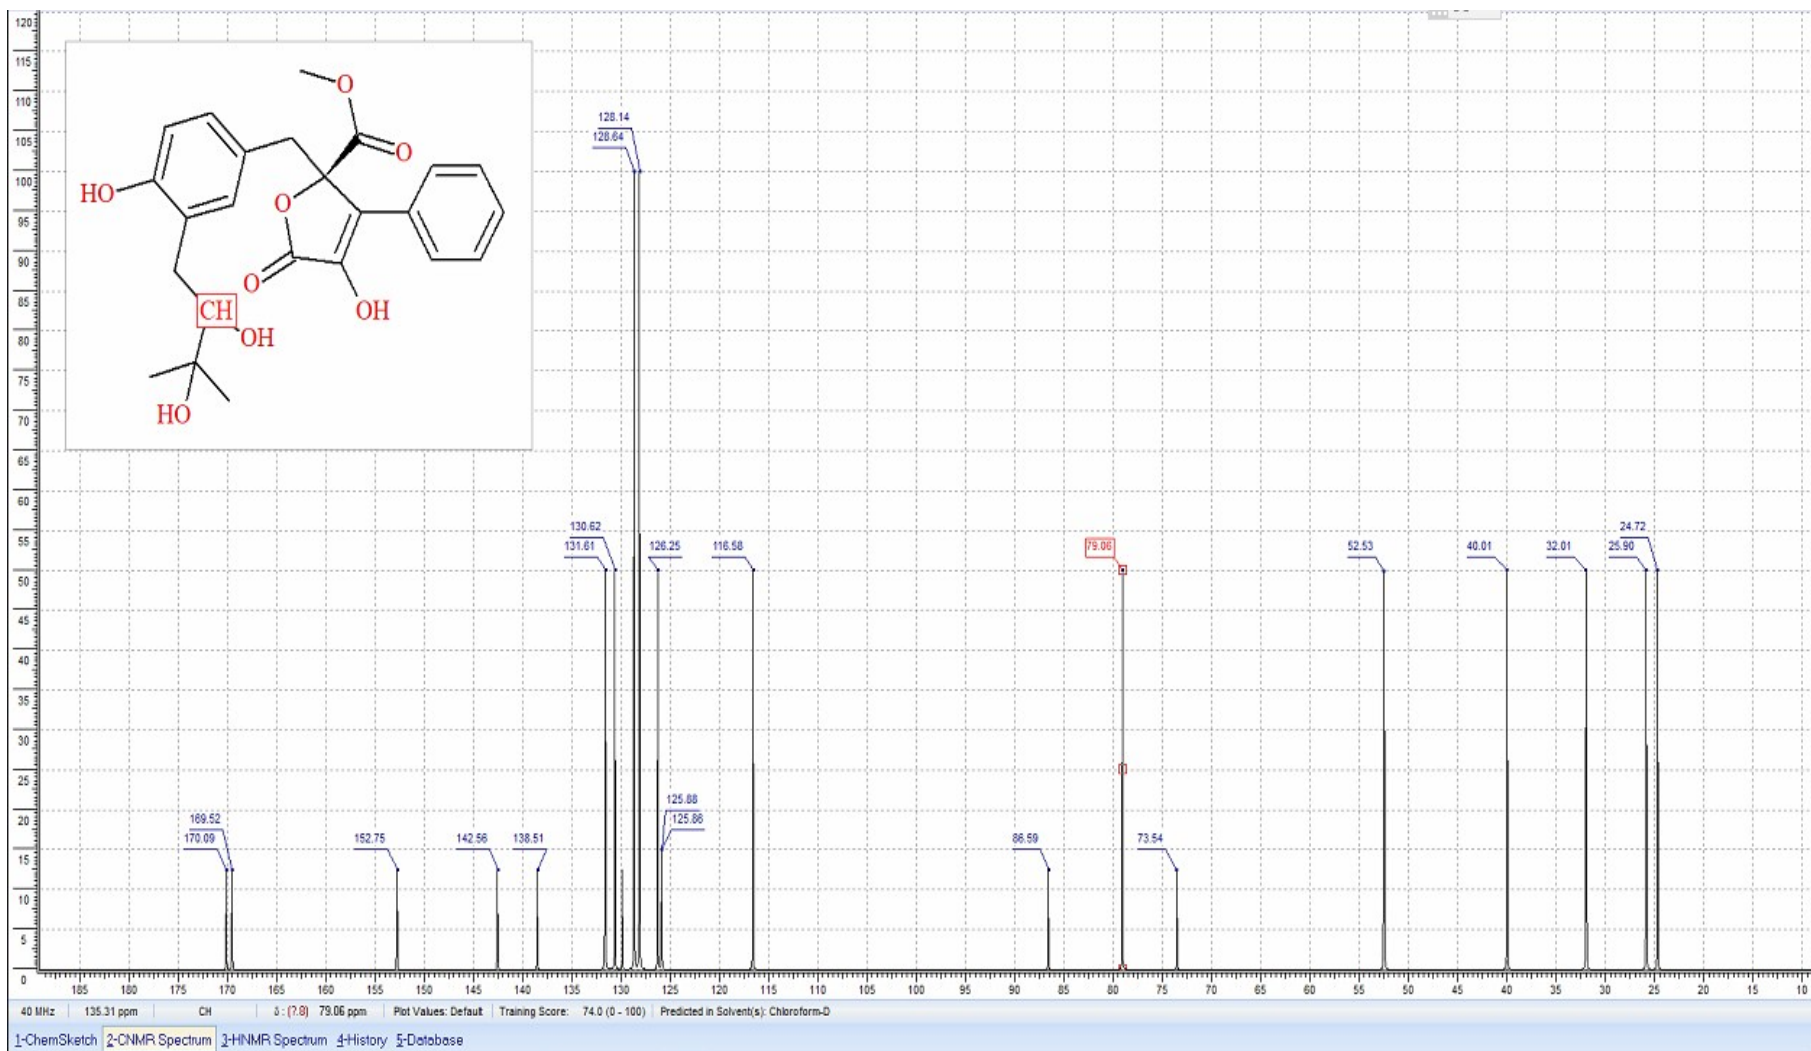

Figure S50.  $^{13}\text{C}$  NMR prediction at C-8'' for compound 1 by ACD/Labs software



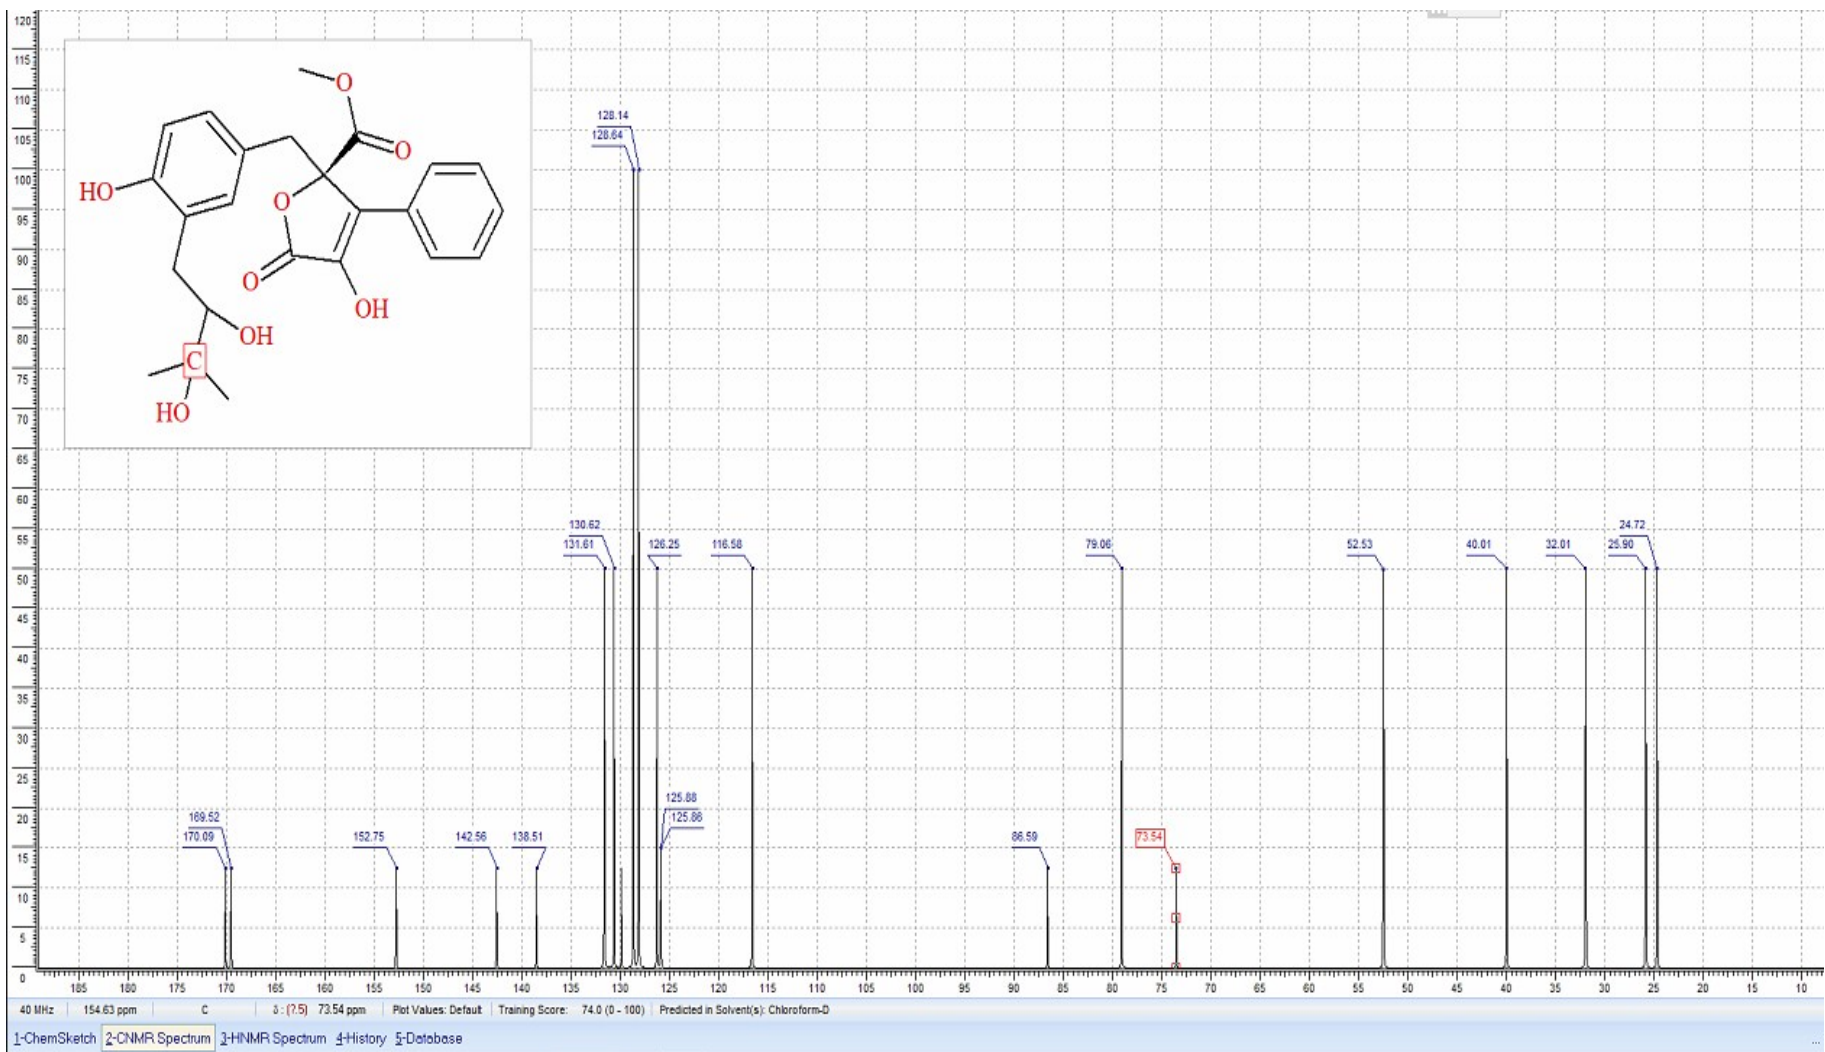

Figure S51.  $^{13}\text{C}$  NMR prediction at C-9'' for compound 1 by ACD/Labs software

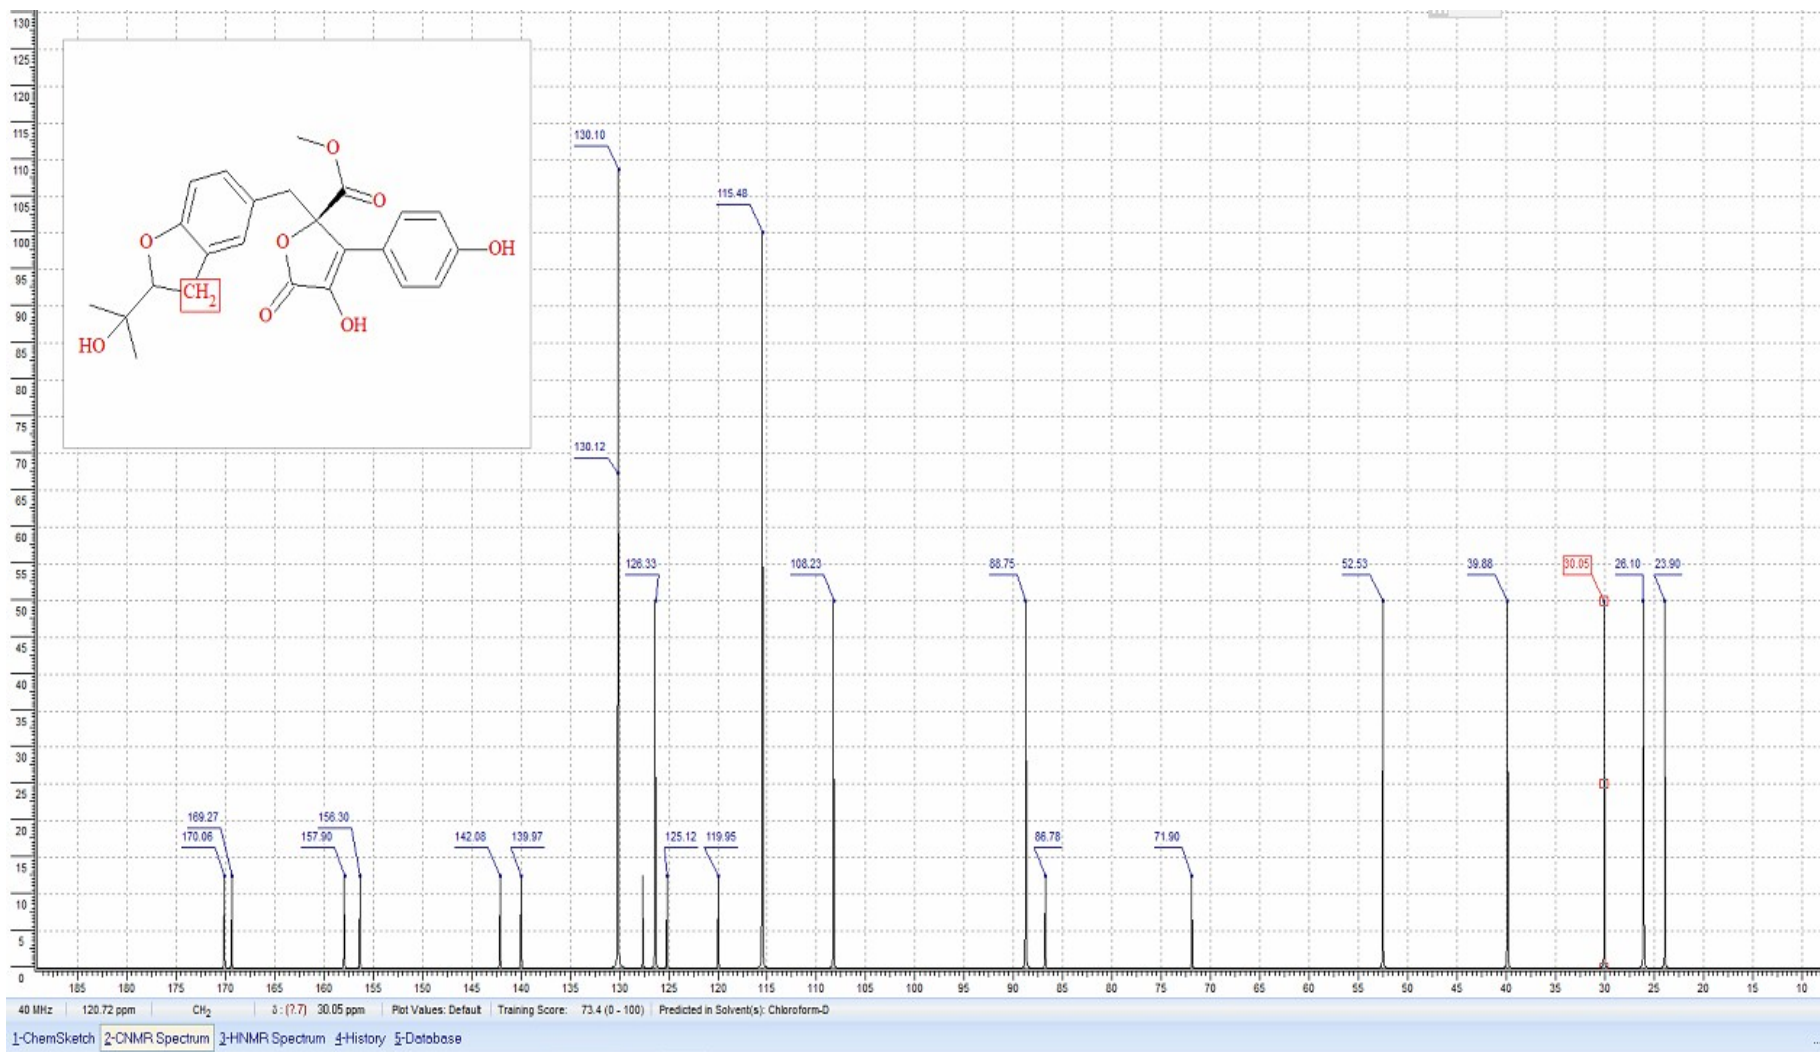

Figure S52.  $^{13}\text{C}$  NMR prediction at C-7'' for compound 5 by ACD/Labs software



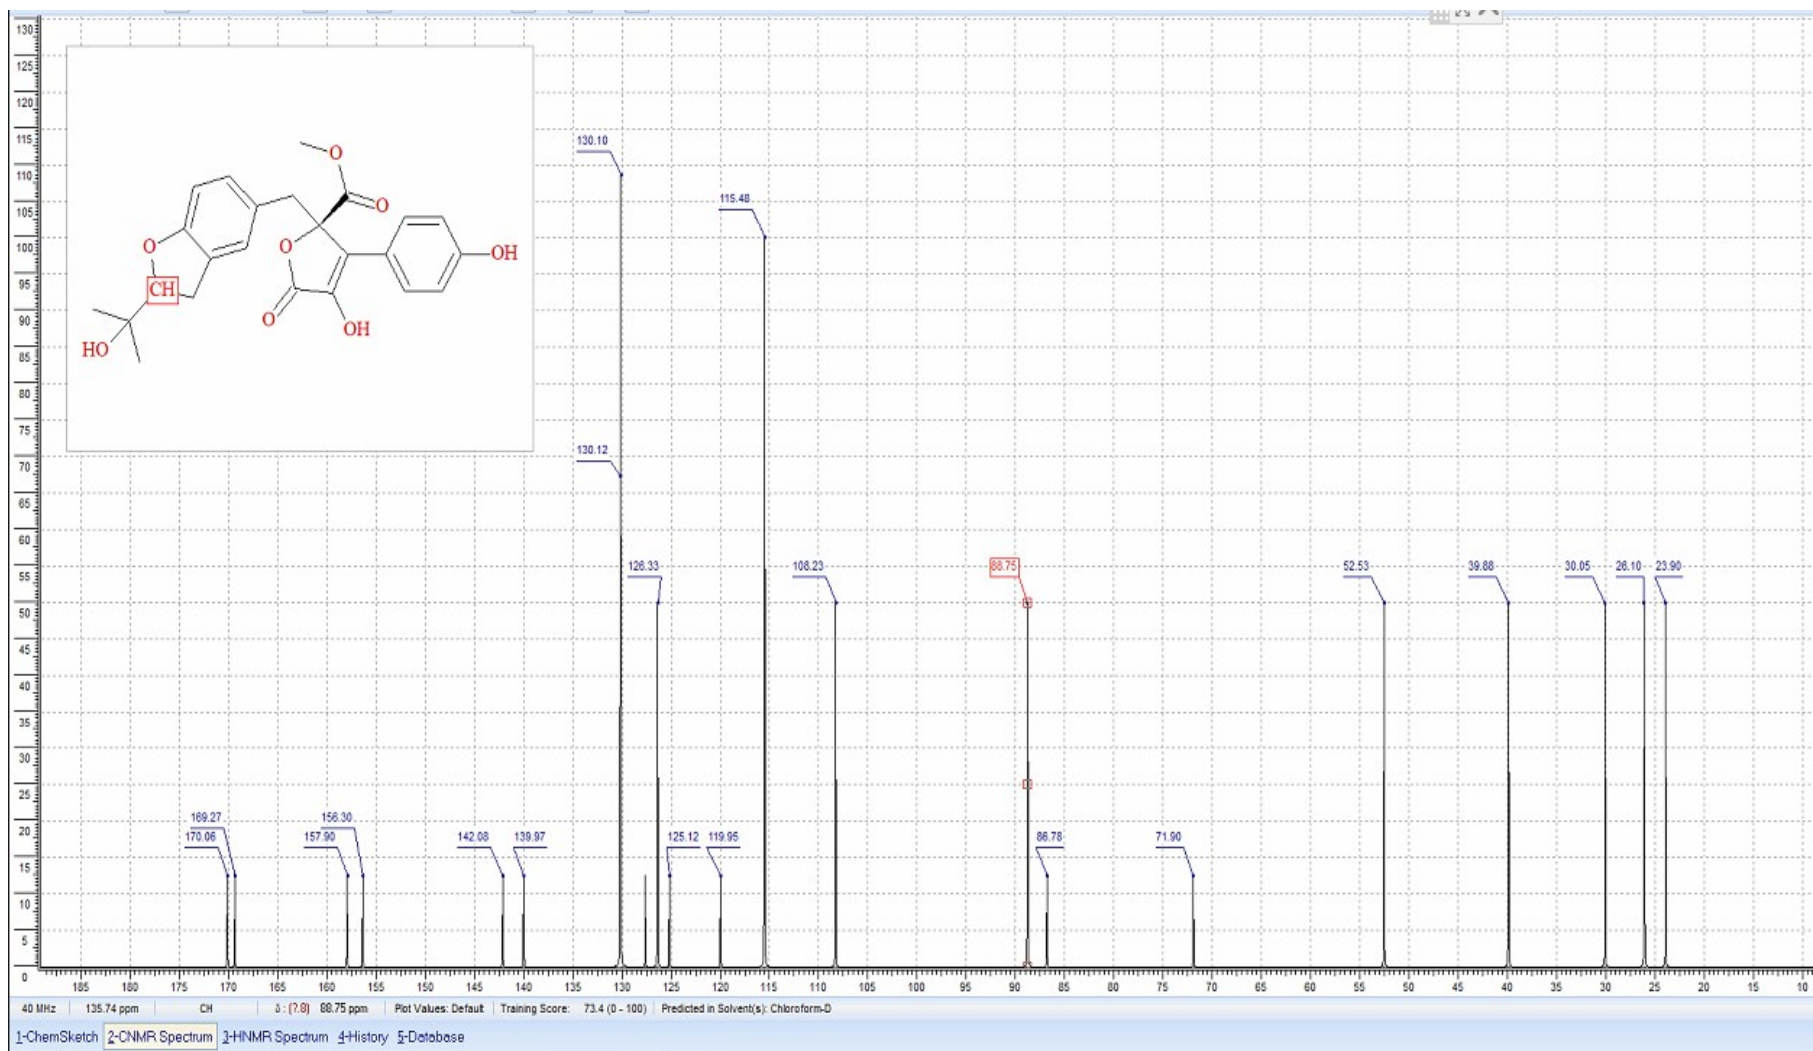

Figure S53. <sup>13</sup>C NMR prediction at C-8'' for compound 5 by ACD/Labs software

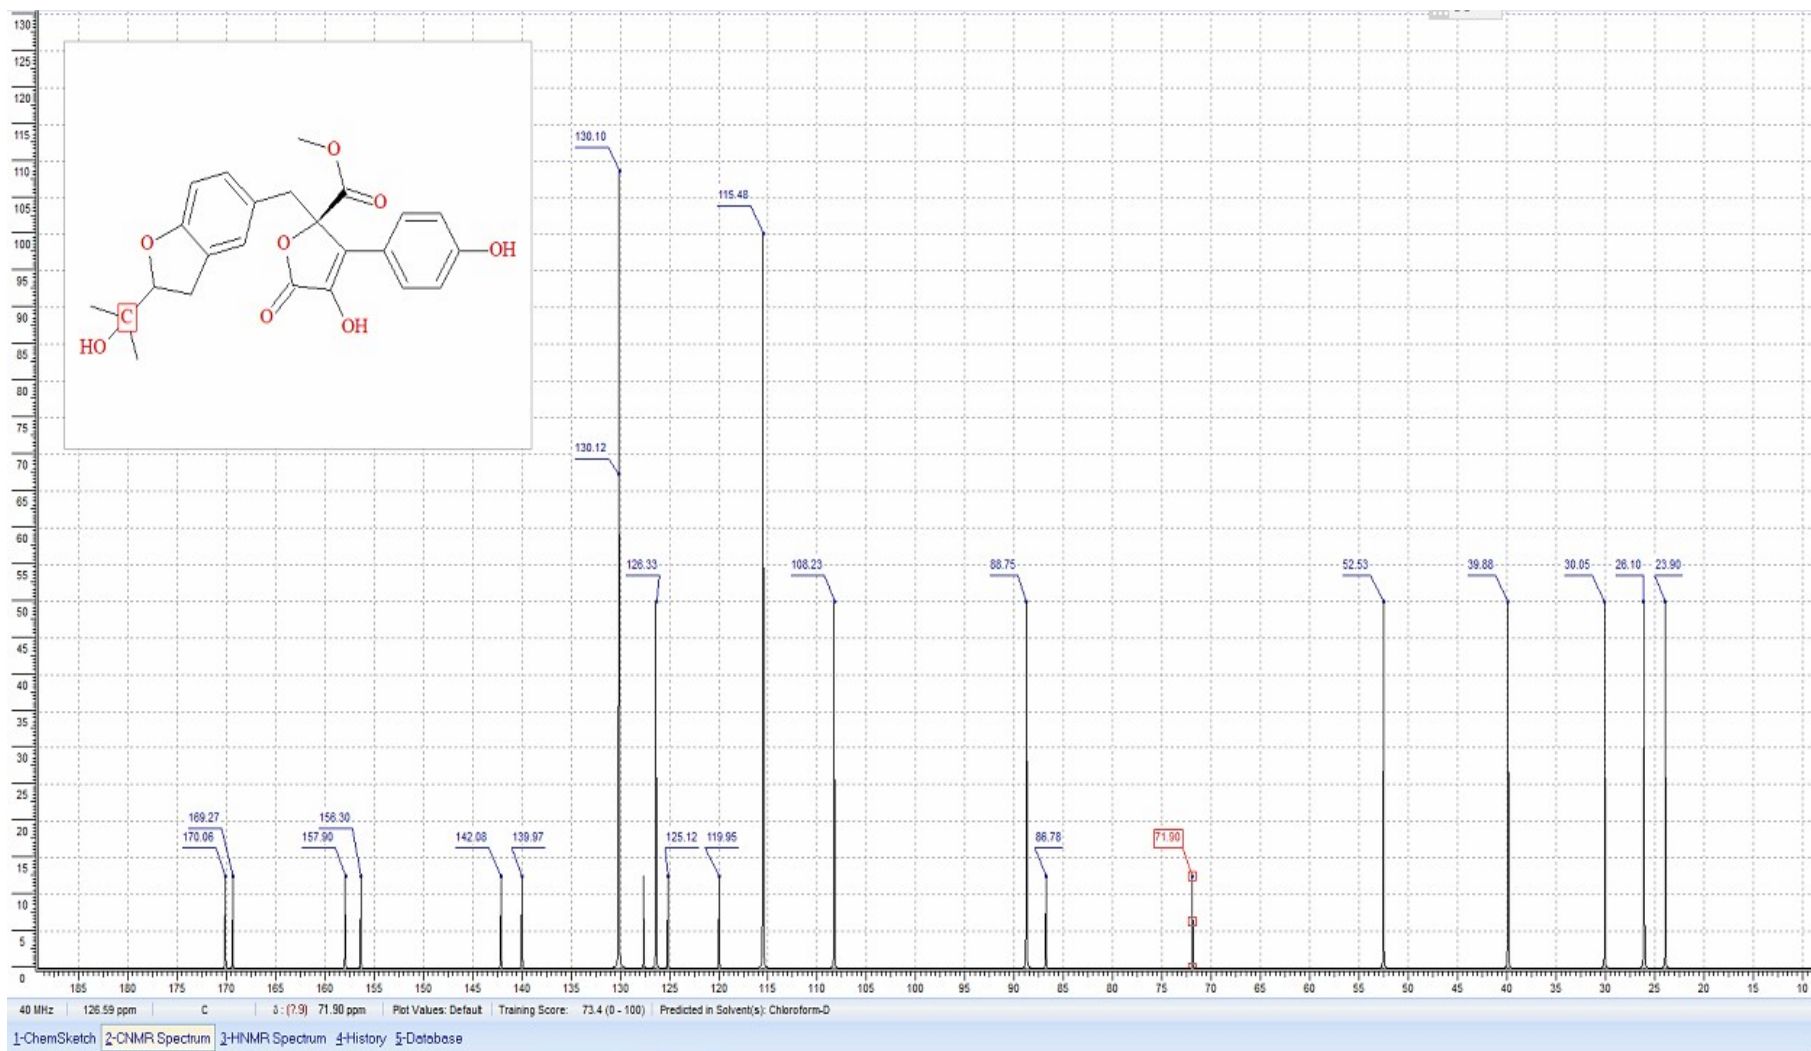

Figure S54. <sup>13</sup>C NMR prediction at C-9' for compound 5 by ACD/Labs software

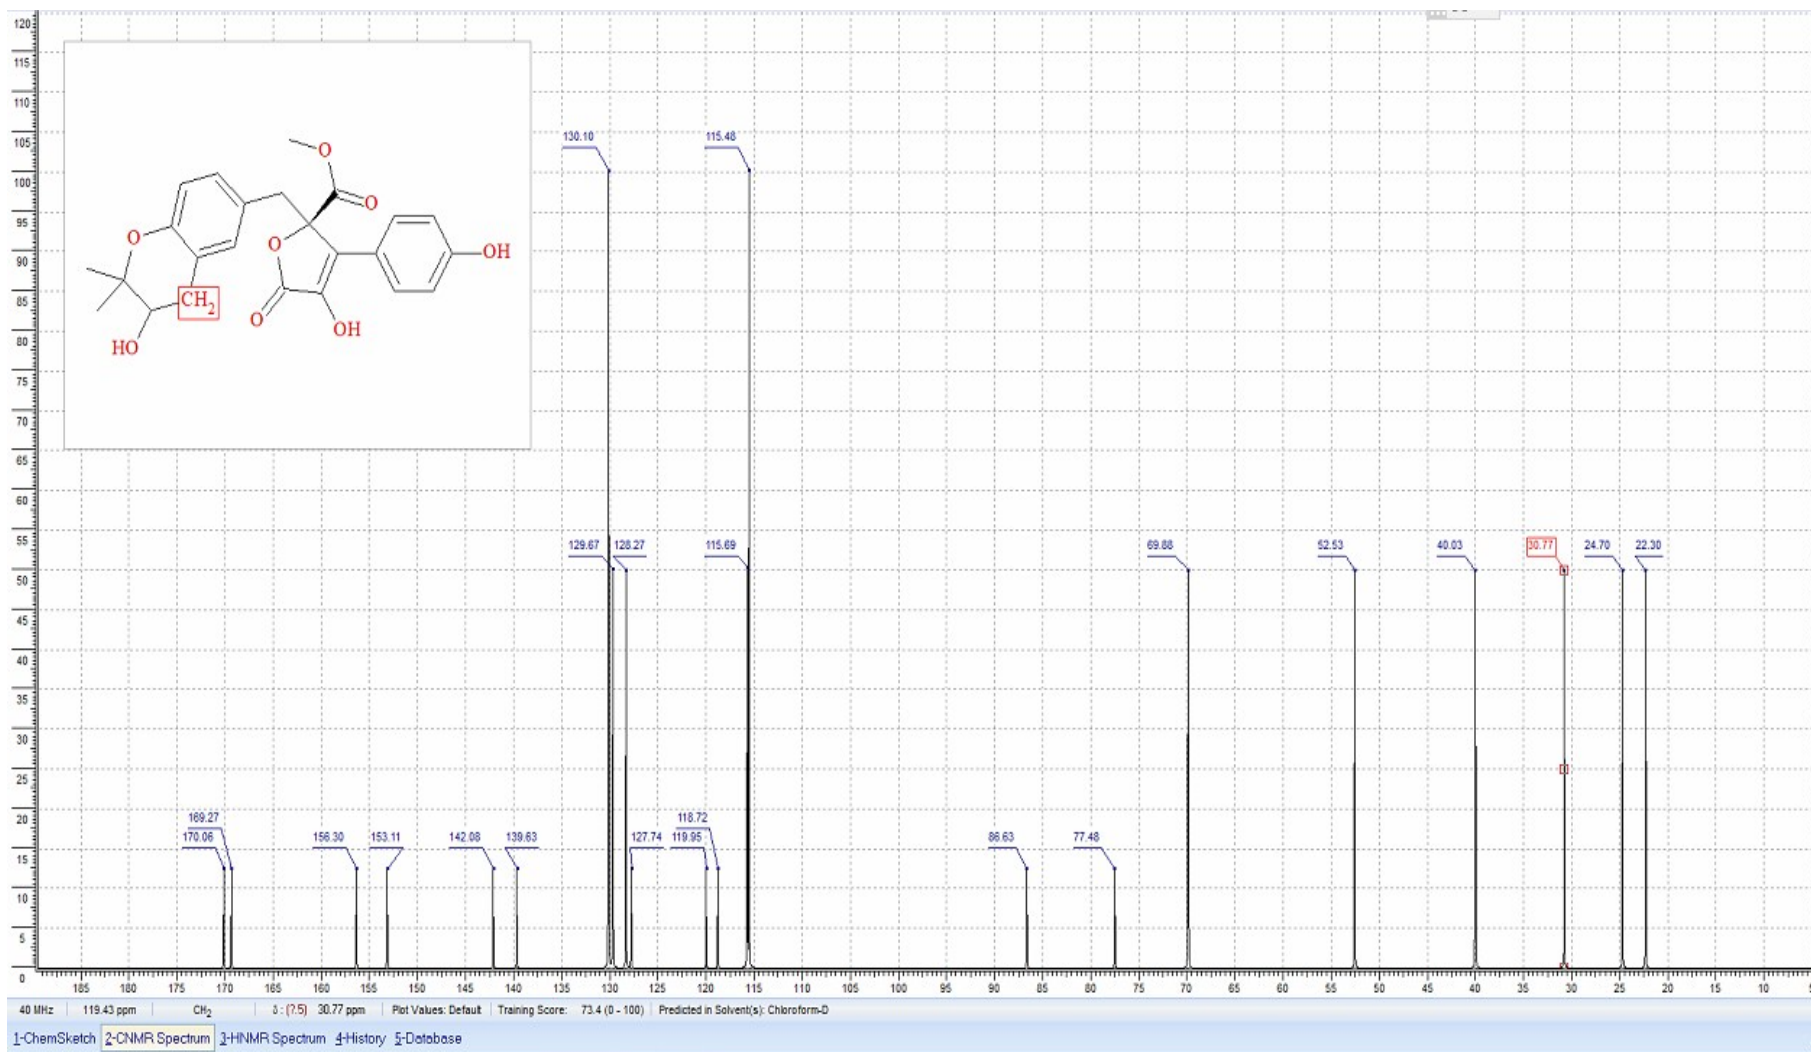

Figure S55. <sup>13</sup>C NMR prediction at C-7'' for compound 7 by ACD/Labs software



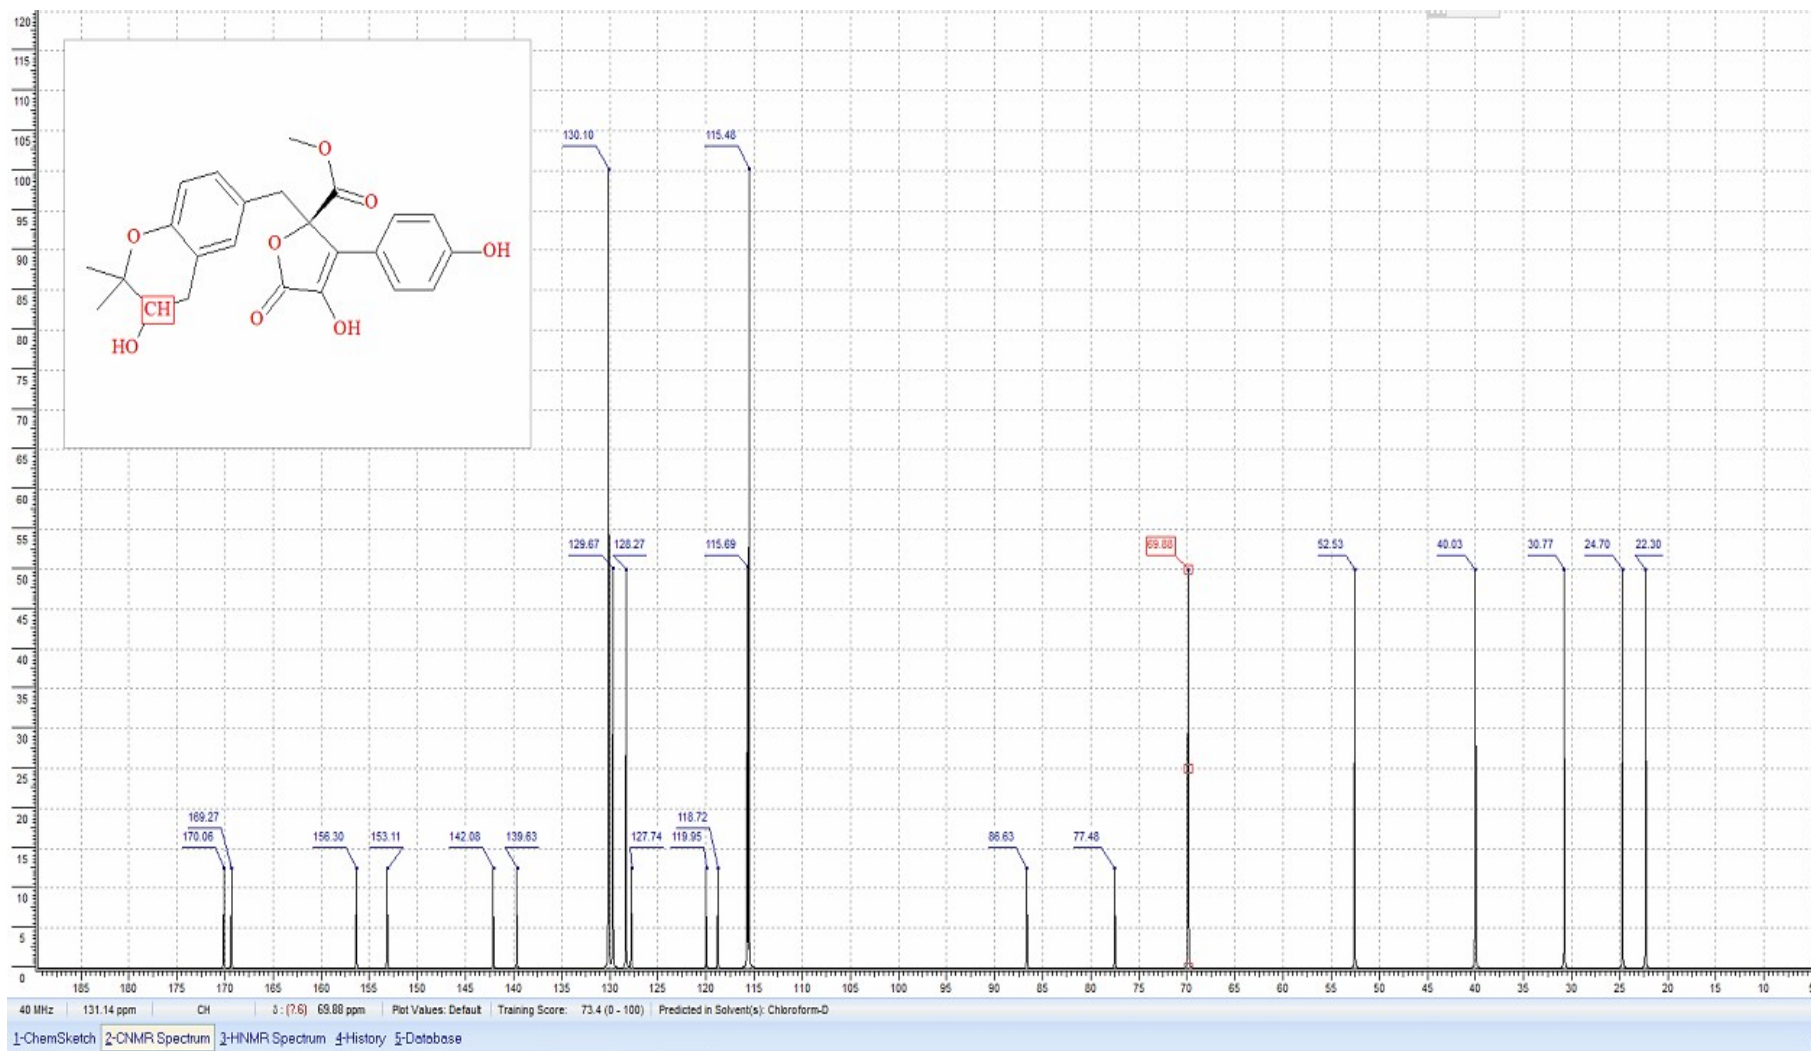

Figure S56. <sup>13</sup>C NMR prediction at C-8'' for compound 7 by ACD/Labs software

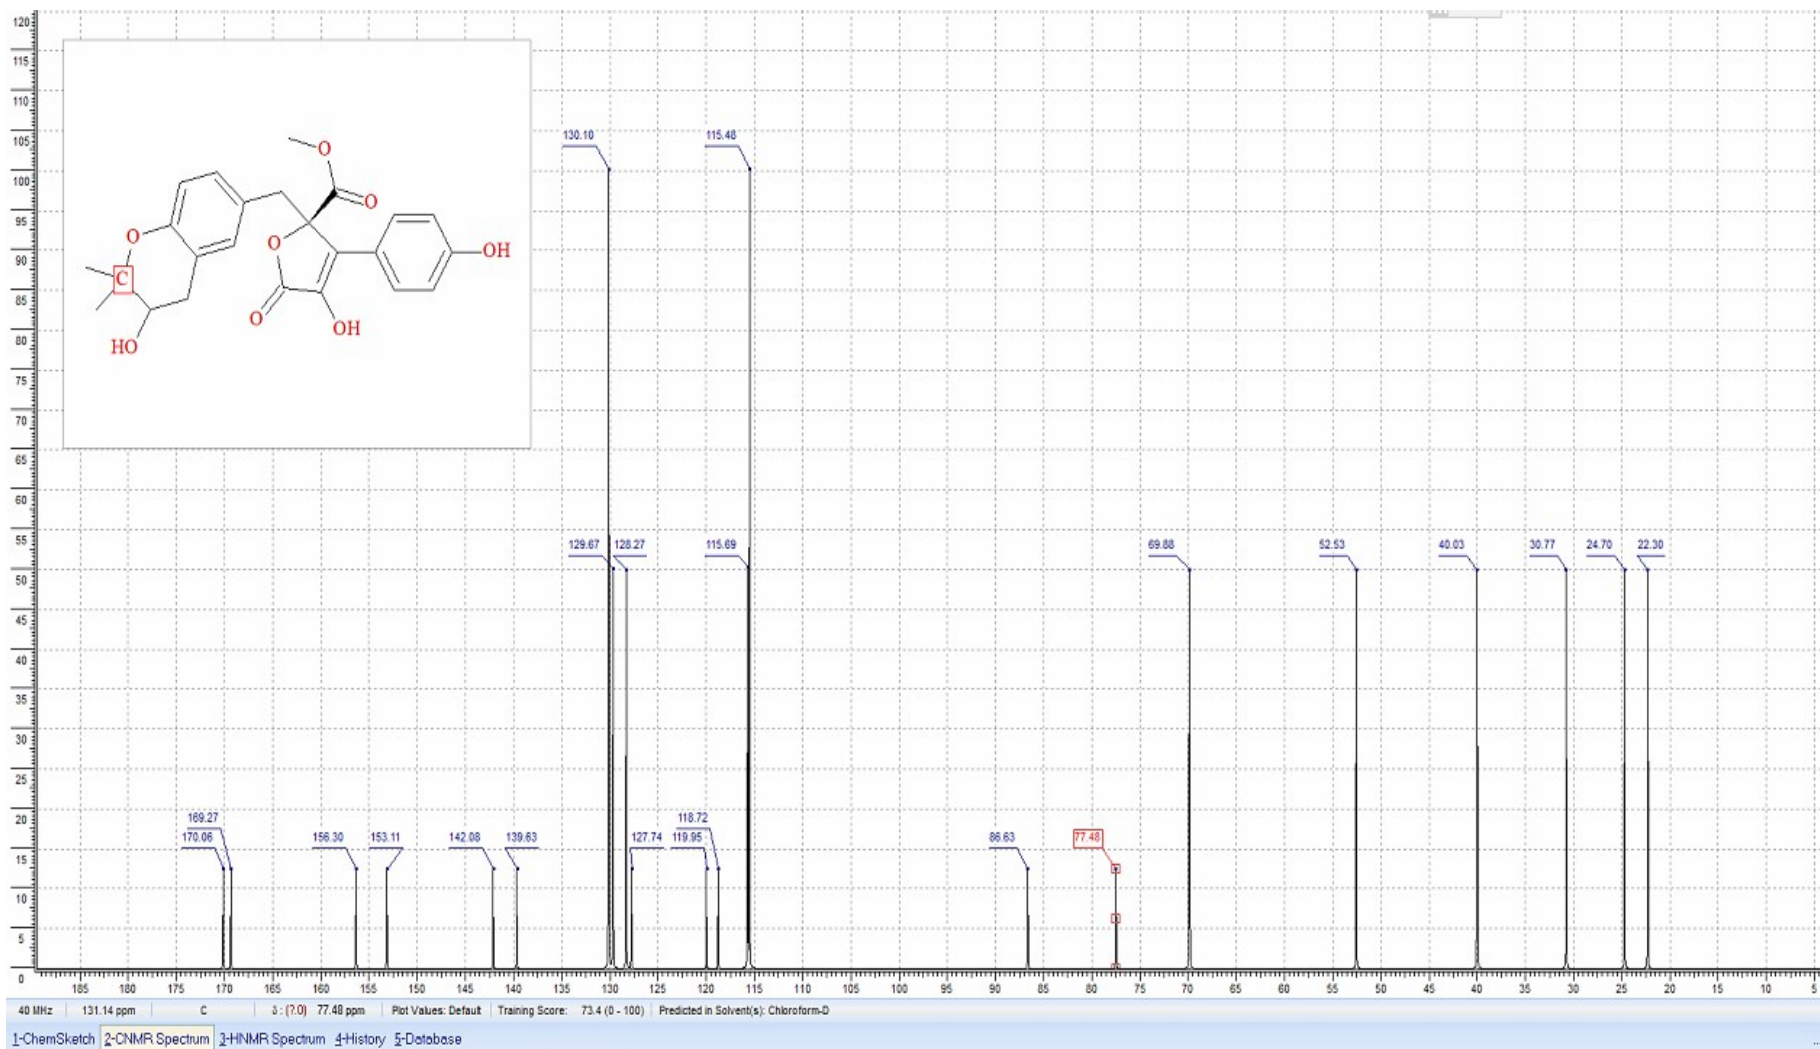

Figure S57.  $^{13}\text{C}$  NMR prediction at C-9'' for compound 7 by ACD/Labs software

## <sup>13</sup>C NMR calculation data

**Table S1.** Important thermodynamic parameters (a.u.) and Boltzmann distributions of the optimized compound **5** at B3LYP/6-31G(d) level in chloroform.

| Conformation  | Energy | %      |
|---------------|--------|--------|
| <b>OME107</b> | 0      | 45.38% |
| <b>OME147</b> | 0.0628 | 40.82% |
| <b>BAL81</b>  | 1.255  | 5.46%  |
| <b>BAL31</b>  | 1.2613 | 5.40%  |
| <b>BAL90</b>  | 2.2151 | 1.08%  |
| <b>BAL64</b>  | 2.4347 | 0.74%  |
| <b>BAL74</b>  | 2.5289 | 0.64%  |
| <b>BAL46</b>  | 2.8238 | 0.39%  |
| <b>BAL60</b>  | 3.6898 | 0.09%  |
| <b>BAL82</b>  | 4.7502 | 0.01%  |

**Table S2.** Optimized coordinates (Å) of compound **5** in the chloroform solution at B3LYP/6-311++G\*\* level.

| <b>OME107</b> |        |       |        | <b>OME147</b> |        |        |        |
|---------------|--------|-------|--------|---------------|--------|--------|--------|
| C1            | -2.648 | 2.087 | 1.316  | C1            | -5.093 | 0.171  | -1.284 |
| C2            | -3.629 | 0.949 | -0.57  | C2            | -3.919 | -1.461 | 0.05   |
| C3            | 0.403  | 0.935 | -1.516 | C3            | 1.181  | -1.691 | 0.672  |

|     |        |        |        |     |        |        |        |
|-----|--------|--------|--------|-----|--------|--------|--------|
| C4  | 1.633  | 1.597  | -1.452 | C4  | 2.524  | -1.866 | 1.025  |
| C5  | -3.424 | 3.206  | 1.051  | C5  | -6.117 | -0.737 | -1.506 |
| C6  | -4.412 | 2.067  | -0.841 | C6  | -4.946 | -2.375 | -0.167 |
| C7  | 1.476  | -1.21  | -1.197 | C7  | 1.738  | 0.204  | -0.726 |
| C8  | -2.727 | 0.926  | 0.512  | C8  | -3.962 | -0.165 | -0.503 |
| C9  | 2.705  | -0.568 | -1.131 | C9  | 3.073  | 0.046  | -0.383 |
| C10 | 0.301  | -0.458 | -1.387 | C10 | 0.768  | -0.665 | -0.19  |
| C11 | 2.769  | 0.82   | -1.256 | C11 | 3.45   | -0.981 | 0.484  |
| C12 | -4.313 | 3.205  | -0.032 | C12 | -6.05  | -2.021 | -0.949 |
| C13 | -1.898 | -0.239 | 0.818  | C13 | -2.894 | 0.819  | -0.309 |
| C14 | -1.161 | -0.489 | 1.925  | C14 | -2.899 | 2.138  | -0.622 |
| C15 | -0.486 | -1.784 | 1.818  | C15 | -1.604 | 2.75   | -0.325 |
| C16 | -3.011 | -2.278 | -0.189 | C16 | -1.564 | 0.161  | 1.753  |
| C17 | 4.108  | -1.095 | -0.944 | C17 | 4.322  | 0.772  | -0.822 |
| C18 | 4.961  | 0.205  | -0.957 | C18 | 5.41   | 0.138  | 0.089  |
| C19 | -1.699 | -1.451 | -0.101 | C19 | -1.487 | 0.533  | 0.253  |
| C20 | 4.9    | 0.614  | 1.57   | C20 | 7.608  | -1.093 | 0.325  |
| C21 | 6.643  | 1.737  | 0.131  | C21 | 7.43   | 0.94   | -1.167 |
| C22 | -4.746 | -3.062 | -1.583 | C22 | -1.814 | 0.987  | 3.944  |
| C23 | -1.047 | -1.145 | -1.472 | C23 | -0.692 | -0.508 | -0.571 |
| C24 | 5.782  | 0.481  | 0.322  | C24 | 6.7    | -0.3   | -0.626 |
| O1  | 0.239  | -2.299 | 2.645  | O1  | -1.292 | 3.911  | -0.497 |

|     |        |        |        |     |        |        |        |
|-----|--------|--------|--------|-----|--------|--------|--------|
| O2  | -3.509 | -2.819 | 0.771  | O2  | -1.569 | -0.982 | 2.163  |
| O3  | 4.04   | 1.317  | -1.176 | O3  | 4.791  | -1.018 | 0.732  |
| O4  | -0.795 | -2.334 | 0.618  | O4  | -0.778 | 1.795  | 0.163  |
| O5  | -5.05  | 4.331  | -0.245 | O5  | -7.082 | -2.873 | -1.202 |
| O6  | -0.985 | 0.246  | 3.041  | O6  | -3.873 | 2.908  | -1.15  |
| O7  | 6.624  | -0.681 | 0.421  | O7  | 6.282  | -1.139 | -1.714 |
| O8  | -3.516 | -2.317 | -1.431 | O8  | -1.677 | 1.24   | 2.528  |
| H1  | -1.965 | 2.11   | 2.157  | H1  | -5.164 | 1.156  | -1.728 |
| H2  | -3.744 | 0.082  | -1.211 | H2  | -3.09  | -1.762 | 0.677  |
| H3  | -0.5   | 1.521  | -1.672 | H3  | 0.436  | -2.364 | 1.086  |
| H4  | 1.703  | 2.676  | -1.555 | H4  | 2.835  | -2.663 | 1.693  |
| H5  | -3.352 | 4.093  | 1.673  | H5  | -6.977 | -0.469 | -2.112 |
| H6  | -5.102 | 2.055  | -1.681 | H6  | -4.888 | -3.367 | 0.277  |
| H7  | 1.415  | -2.291 | -1.102 | H7  | 1.436  | 0.997  | -1.405 |
| H8  | 4.235  | -1.651 | -0.011 | H8  | 4.541  | 0.58   | -1.878 |
| H9  | 4.409  | -1.767 | -1.755 | H9  | 4.262  | 1.856  | -0.681 |
| H10 | 5.656  | 0.205  | -1.803 | H10 | 5.687  | 0.827  | 0.897  |
| H11 | 5.53   | 0.772  | 2.455  | H11 | 8.524  | -1.395 | -0.197 |
| H12 | 4.305  | -0.288 | 1.74   | H12 | 7.094  | -1.989 | 0.679  |
| H13 | 4.224  | 1.47   | 1.485  | H13 | 7.901  | -0.49  | 1.192  |
| H14 | 7.261  | 1.915  | 1.02   | H14 | 8.346  | 0.635  | -1.686 |
| H15 | 7.309  | 1.614  | -0.73  | H15 | 6.804  | 1.488  | -1.878 |



|              |        |        |        |              |        |        |        |
|--------------|--------|--------|--------|--------------|--------|--------|--------|
| H16          | 6.02   | 2.621  | -0.032 | H16          | 7.718  | 1.621  | -0.358 |
| H17          | -5.003 | -2.981 | -2.638 | H17          | -1.887 | 1.97   | 4.405  |
| H18          | -5.528 | -2.628 | -0.957 | H18          | -0.939 | 0.449  | 4.315  |
| H19          | -4.588 | -4.105 | -1.302 | H19          | -2.715 | 0.4    | 4.136  |
| H20          | -1.743 | -0.535 | -2.052 | H20          | -0.776 | -0.188 | -1.616 |
| H21          | -0.953 | -2.099 | -2.001 | H21          | -1.209 | -1.467 | -0.491 |
| H22          | -5.624 | 4.201  | -1.018 | H22          | -6.912 | -3.725 | -0.768 |
| H23          | -0.394 | -0.271 | 3.624  | H23          | -3.498 | 3.809  | -1.229 |
| H24          | 7.173  | -0.573 | 1.214  | H24          | 7.082  | -1.421 | -2.185 |
| <b>BAL81</b> |        |        |        | <b>OME31</b> |        |        |        |
| C1           | -3.947 | -1.276 | -1.283 | C1           | -4.964 | -0.478 | 0.652  |
| C2           | -5.215 | 0.253  | 0.083  | C2           | -3.806 | -1.358 | -1.271 |
| C3           | 1.196  | -1.746 | 0.441  | C3           | 1.437  | 1.44   | -1.637 |
| C4           | 2.528  | -1.938 | 0.83   | C4           | 2.828  | 1.577  | -1.594 |
| C5           | -5.064 | -2.091 | -1.413 | C5           | -5.863 | -1.538 | 0.609  |
| C6           | -6.342 | -0.556 | -0.044 | C6           | -4.7   | -2.423 | -1.321 |
| C7           | 1.798  | 0.21   | -0.855 | C7           | 1.567  | -0.773 | -0.663 |
| C8           | -3.993 | -0.087 | -0.53  | C8           | -3.913 | -0.365 | -0.282 |
| C9           | 3.121  | 0.033  | -0.478 | C9           | 2.949  | -0.653 | -0.615 |
| C10          | 0.813  | -0.682 | -0.389 | C10          | 0.791  | 0.281  | -1.182 |
| C11          | 3.467  | -1.031 | 0.358  | C11          | 3.559  | 0.513  | -1.078 |
| C12          | -6.27  | -1.735 | -0.793 | C12          | -5.732 | -2.52  | -0.379 |

|     |        |        |        |     |        |        |        |
|-----|--------|--------|--------|-----|--------|--------|--------|
| C13 | -2.845 | 0.827  | -0.391 | C13 | -3.011 | 0.801  | -0.212 |
| C14 | -2.873 | 2.163  | -0.575 | C14 | -3.395 | 2.092  | -0.146 |
| C15 | -1.559 | 2.757  | -0.256 | C15 | -2.217 | 2.973  | 0.002  |
| C16 | -1.57  | -0.085 | 1.534  | C16 | -1.146 | 0.046  | 1.239  |
| C17 | 4.39   | 0.763  | -0.85  | C17 | 4.031  | -1.563 | -0.082 |
| C18 | 5.412  | 0.165  | 0.148  | C18 | 5.316  | -0.882 | -0.613 |
| C19 | -1.437 | 0.476  | 0.103  | C19 | -1.486 | 0.781  | -0.074 |
| C20 | 7.467  | 1.044  | -1.027 | C20 | 6.921  | -2.174 | 0.845  |
| C21 | 7.685  | -0.814 | 0.665  | C21 | 7.675  | -0.04  | -0.268 |
| C22 | -1.629 | 0.407  | 3.833  | C22 | -0.807 | 0.241  | 3.559  |
| C23 | -0.638 | -0.503 | -0.792 | C23 | -0.719 | 0.156  | -1.264 |
| C24 | 6.798  | -0.193 | -0.426 | C24 | 6.494  | -0.782 | 0.376  |
| O1  | -1.199 | 3.908  | -0.308 | O1  | -2.159 | 4.176  | 0.081  |
| O2  | -1.824 | -1.252 | 1.749  | O2  | -1.043 | -1.162 | 1.297  |
| O3  | 4.807  | -1.079 | 0.639  | O3  | 4.924  | 0.486  | -0.971 |
| O4  | -0.738 | 1.735  | 0.128  | O4  | -1.113 | 2.169  | 0.027  |
| O5  | -7.329 | -2.575 | -0.957 | O5  | -6.634 | -3.54  | -0.376 |
| O6  | -3.854 | 2.984  | -0.999 | O6  | -4.612 | 2.665  | -0.21  |
| O7  | 6.628  | -1.124 | -1.503 | O7  | 6.057  | -0.079 | 1.548  |
| O8  | -1.447 | 0.855  | 2.473  | O8  | -1.055 | 0.871  | 2.284  |
| H1  | -3.034 | -1.561 | -1.793 | H1  | -5.058 | 0.263  | 1.442  |
| H2  | -5.277 | 1.149  | 0.695  | H2  | -3.031 | -1.293 | -2.027 |

|     |        |        |        |     |        |        |        |
|-----|--------|--------|--------|-----|--------|--------|--------|
| H3  | 0.438  | -2.436 | 0.8    | H3  | 0.842  | 2.254  | -2.04  |
| H4  | 2.817  | -2.762 | 1.474  | H4  | 3.321  | 2.473  | -1.956 |
| H5  | -5.023 | -3.004 | -1.998 | H5  | -6.662 | -1.623 | 1.339  |
| H6  | -7.271 | -0.276 | 0.448  | H6  | -4.601 | -3.178 | -2.098 |
| H7  | 1.516  | 1.033  | -1.506 | H7  | 1.078  | -1.673 | -0.3   |
| H8  | 4.683  | 0.534  | -1.882 | H8  | 4.028  | -1.573 | 1.015  |
| H9  | 4.317  | 1.85   | -0.75  | H9  | 3.947  | -2.597 | -0.431 |
| H10 | 5.531  | 0.822  | 1.018  | H10 | 5.653  | -1.364 | -1.54  |
| H11 | 7.612  | 1.819  | -0.266 | H11 | 7.255  | -2.786 | 0.001  |
| H12 | 8.448  | 0.771  | -1.429 | H12 | 7.752  | -2.083 | 1.552  |
| H13 | 6.87   | 1.461  | -1.843 | H13 | 6.101  | -2.692 | 1.351  |
| H14 | 7.217  | -1.709 | 1.087  | H14 | 7.378  | 0.965  | -0.585 |
| H15 | 7.863  | -0.107 | 1.484  | H15 | 8.05   | -0.576 | -1.148 |
| H16 | 8.651  | -1.096 | 0.235  | H16 | 8.491  | 0.051  | 0.456  |
| H17 | -1.494 | 1.295  | 4.449  | H17 | -0.76  | 1.057  | 4.279  |
| H18 | -2.632 | -0.006 | 3.964  | H18 | -1.618 | -0.447 | 3.806  |
| H19 | -0.886 | -0.353 | 4.082  | H19 | 0.139  | -0.304 | 3.532  |
| H20 | -0.705 | -0.12  | -1.816 | H20 | -1.093 | 0.646  | -2.169 |
| H21 | -1.151 | -1.466 | -0.759 | H21 | -1     | -0.898 | -1.313 |
| H22 | -8.098 | -2.226 | -0.476 | H22 | -6.425 | -4.161 | -1.093 |
| H23 | -4.633 | 2.447  | -1.233 | H23 | -5.278 | 1.97   | -0.36  |
| H24 | 6.124  | -1.87  | -1.134 | H24 | 5.709  | 0.774  | 1.234  |

| OME90 |        |        |        |     |        |        |        |
|-------|--------|--------|--------|-----|--------|--------|--------|
| C1    | -5.111 | 0.165  | 0.252  | O5  | -7.19  | -2.473 | -1.143 |
| C2    | -3.862 | -0.936 | -1.492 | O6  | -3.957 | 3.158  | -0.556 |
| C3    | 1.222  | -1.709 | 0.111  | O7  | 7.456  | -1.233 | 0.079  |
| C4    | 2.533  | -2.013 | 0.498  | O8  | -1.762 | -1.268 | 1.513  |
| C5    | -6.191 | -0.681 | 0.026  | H1  | -5.178 | 0.91   | 1.04   |
| C6    | -4.937 | -1.789 | -1.724 | H2  | -2.977 | -1.032 | -2.112 |
| C7    | 1.86   | 0.548  | -0.487 | H3  | 0.459  | -2.478 | 0.191  |
| C8    | -3.921 | 0.054  | -0.496 | H4  | 2.8    | -2.996 | 0.871  |
| C9    | 3.162  | 0.264  | -0.104 | H5  | -7.1   | -0.596 | 0.613  |
| C10   | 0.866  | -0.444 | -0.38  | H6  | -4.871 | -2.545 | -2.503 |
| C11   | 3.483  | -1.006 | 0.38   | H7  | 1.6    | 1.533  | -0.866 |
| C12   | -6.107 | -1.667 | -0.964 | H8  | 4.652  | 1.51   | -1.088 |
| C13   | -2.819 | 1.004  | -0.245 | H9  | 4.326  | 1.966  | 0.579  |
| C14   | -2.924 | 2.348  | -0.256 | H10 | 5.94   | 0.444  | 1.35   |
| C15   | -1.632 | 2.969  | 0.109  | H11 | 7.032  | -1.036 | -2.521 |
| C16   | -1.458 | 0.035  | 1.604  | H12 | 5.533  | -1.633 | -1.785 |
| C17   | 4.415  | 1.109  | -0.097 | H13 | 5.595  | 0.002  | -2.472 |
| C18   | 5.497  | 0.113  | 0.407  | H14 | 7.934  | 1.335  | 0.251  |
| C19   | -1.391 | 0.671  | 0.197  | H15 | 7.054  | 1.818  | -1.218 |
| C20   | 6.166  | -0.749 | -1.915 | H16 | 8.438  | 0.715  | -1.332 |
| C21   | 7.571  | 0.99   | -0.723 | H17 | -2.185 | -2.986 | 2.501  |

|     |        |        |        |     |        |        |        |
|-----|--------|--------|--------|-----|--------|--------|--------|
| C22 | -1.92  | -1.964 | 2.768  | H18 | -0.984 | -1.942 | 3.331  |
| C23 | -0.562 | -0.165 | -0.807 | H19 | -2.714 | -1.501 | 3.359  |
| C24 | 6.656  | -0.224 | -0.557 | H20 | -0.582 | 0.386  | -1.755 |
| O1  | -1.33  | 4.135  | 0.182  | H21 | -1.085 | -1.11  | -0.966 |
| O2  | -1.313 | 0.639  | 2.642  | H22 | -7.004 | -3.115 | -1.848 |
| O3  | 4.801  | -1.143 | 0.714  | H23 | -4.719 | 2.609  | -0.816 |
| O4  | -0.751 | 1.953  | 0.349  | H24 | 6.843  | -1.952 | 0.308  |

**Table S3.** Important thermodynamic parameters (a.u.) and Boltzmann distributions of the optimized compound **7** at B3LYP/6-31G(d) level in chloroform.

| Conformation | Energy | %      |
|--------------|--------|--------|
| <b>OME39</b> | 0      | 38.70% |
| <b>OME24</b> | 0.0251 | 37.09% |
| <b>OME12</b> | 0.9977 | 7.18%  |
| <b>OME28</b> | 1.2801 | 4.46%  |
| <b>OME17</b> | 1.3052 | 4.27%  |
| <b>OME11</b> | 1.3303 | 4.10%  |
| <b>OME19</b> | 1.4558 | 3.32%  |
| <b>OME3</b>  | 2.5853 | 0.49%  |
| <b>OME54</b> | 2.9116 | 0.28%  |
| <b>BAL58</b> | 3.7776 | 0.07%  |
| <b>BAL33</b> | 4.129  | 0.04%  |

**Table S4.** Optimized coordinates (Å) of compound **7** in the chloroform solution at B3LYP/6-311++G\*\* level.

| <b>OME39</b> |        |       |        | <b>OME24</b> |        |        |        |
|--------------|--------|-------|--------|--------------|--------|--------|--------|
| C1           | -2.768 | 1.974 | 1.316  | C1           | -2.674 | 1.74   | -0.851 |
| C2           | -3.44  | 1.149 | -0.849 | C2           | -1.746 | 2.197  | 1.329  |
| C3           | 0.694  | 1.132 | -1.14  | C3           | 1.147  | -2.32  | -0.935 |
| C4           | 1.912  | 1.703 | -0.787 | C4           | 2.482  | -2.277 | -0.549 |
| C5           | -3.476 | 3.145 | 1.097  | C5           | -2.853 | 3.101  | -1.065 |

|     |        |        |        |     |        |        |        |
|-----|--------|--------|--------|-----|--------|--------|--------|
| C6  | -4.155 | 2.322  | -1.075 | C6  | -1.92  | 3.559  | 1.119  |
| C7  | 1.671  | -1.056 | -0.963 | C7  | 1.11   | 0.079  | -1.061 |
| C8  | -2.726 | 0.942  | 0.349  | C8  | -2.116 | 1.249  | 0.35   |
| C9  | 2.909  | -0.51  | -0.604 | C9  | 2.452  | 0.154  | -0.672 |
| C10 | 0.55   | -0.262 | -1.228 | C10 | 0.435  | -1.139 | -1.197 |
| C11 | 3.016  | 0.887  | -0.516 | C11 | 3.135  | -1.046 | -0.417 |
| C12 | -4.177 | 3.328  | -0.104 | C12 | -2.476 | 4.021  | -0.081 |
| C13 | -1.97  | -0.281 | 0.612  | C13 | -1.92  | -0.179 | 0.599  |
| C14 | -1.408 | -0.701 | 1.77   | C14 | -1.596 | -0.803 | 1.755  |
| C15 | -0.745 | -1.993 | 1.587  | C15 | -1.507 | -2.25  | 1.556  |
| C16 | -2.912 | -2.076 | -0.942 | C16 | -3.469 | -1.426 | -1.006 |
| C17 | 4.113  | -1.383 | -0.321 | C17 | 3.168  | 1.48   | -0.524 |
| C18 | 5.414  | -0.569 | -0.356 | C18 | 4.465  | 1.327  | 0.284  |
| C19 | -1.638 | -1.358 | -0.428 | C19 | -2.026 | -1.283 | -0.458 |
| C20 | 5.25   | 0.753  | 0.43   | C20 | 5.268  | 0.099  | -0.205 |
| C21 | 6.496  | 1.63   | 0.329  | C21 | 6.512  | -0.14  | 0.646  |
| C22 | 4.868  | 0.52   | 1.897  | C22 | 5.636  | 0.19   | -1.691 |
| C23 | -4.712 | -3.472 | -0.336 | C23 | -5.694 | -1.968 | -0.45  |
| C24 | -0.77  | -0.888 | -1.62  | C24 | -1.016 | -1.182 | -1.626 |
| O1  | -0.163 | -2.641 | 2.434  | O1  | -1.256 | -3.089 | 2.398  |
| O2  | -3.316 | -2.006 | -2.084 | O2  | -3.781 | -1.213 | -2.159 |
| O3  | 4.197  | 1.527  | -0.223 | O3  | 4.439  | -1.085 | 0.013  |

|     |        |        |        |     |        |        |        |
|-----|--------|--------|--------|-----|--------|--------|--------|
| O4  | -0.881 | -2.369 | 0.291  | O4  | -1.754 | -2.522 | 0.251  |
| O5  | -4.857 | 4.498  | -0.263 | O5  | -2.672 | 5.343  | -0.343 |
| O6  | -1.394 | -0.13  | 2.992  | O6  | -1.376 | -0.3   | 2.987  |
| O7  | 5.827  | -0.316 | -1.699 | O7  | 4.191  | 1.233  | 1.682  |
| O8  | -3.509 | -2.763 | 0.034  | O8  | -4.317 | -1.8   | -0.047 |
| H1  | -2.231 | 1.853  | 2.249  | H1  | -2.994 | 1.057  | -1.629 |
| H2  | -3.462 | 0.385  | -1.618 | H2  | -1.312 | 1.862  | 2.263  |
| H3  | -0.154 | 1.777  | -1.35  | H3  | 0.652  | -3.281 | -1.037 |
| H4  | 2.03   | 2.781  | -0.721 | H4  | 3.039  | -3.187 | -0.348 |
| H5  | -3.498 | 3.932  | 1.845  | H5  | -3.288 | 3.464  | -1.991 |
| H6  | -4.699 | 2.451  | -2.007 | H6  | -1.622 | 4.268  | 1.888  |
| H7  | 1.587  | -2.137 | -1.042 | H7  | 0.578  | 1.008  | -1.258 |
| H8  | 4.007  | -1.871 | 0.657  | H8  | 3.395  | 1.903  | -1.512 |
| H9  | 4.189  | -2.187 | -1.061 | H9  | 2.527  | 2.208  | -0.014 |
| H10 | 6.228  | -1.15  | 0.09   | H10 | 5.081  | 2.224  | 0.171  |
| H11 | 6.306  | 2.603  | 0.793  | H11 | 6.991  | -1.08  | 0.354  |
| H12 | 6.781  | 1.782  | -0.714 | H12 | 6.255  | -0.186 | 1.706  |
| H13 | 7.332  | 1.154  | 0.851  | H13 | 7.23   | 0.674  | 0.499  |
| H14 | 4.823  | 1.478  | 2.424  | H14 | 6.248  | -0.672 | -1.973 |
| H15 | 5.616  | -0.109 | 2.392  | H15 | 6.215  | 1.1    | -1.886 |
| H16 | 3.893  | 0.034  | 1.995  | H16 | 4.752  | 0.201  | -2.334 |
| H17 | -5.047 | -3.964 | 0.575  | H17 | -6.222 | -2.275 | 0.452  |



|              |        |        |        |              |        |        |        |
|--------------|--------|--------|--------|--------------|--------|--------|--------|
| H18          | -4.492 | -4.206 | -1.114 | H18          | -5.769 | -2.737 | -1.222 |
| H19          | -5.467 | -2.769 | -0.697 | H19          | -6.092 | -1.025 | -0.83  |
| H20          | -1.362 | -0.187 | -2.213 | H20          | -1.266 | -0.294 | -2.212 |
| H21          | -0.604 | -1.766 | -2.253 | H21          | -1.198 | -2.044 | -2.276 |
| H22          | -5.301 | 4.499  | -1.127 | H22          | -2.378 | 5.871  | 0.417  |
| H23          | -0.899 | -0.739 | 3.576  | H23          | -1.181 | -1.062 | 3.568  |
| H24          | 5.202  | 0.328  | -2.073 | H24          | 3.782  | 0.364  | 1.835  |
| <b>OME12</b> |        |        |        | <b>OME28</b> |        |        |        |
| C1           | -3.494 | 0.96   | -0.768 | C1           | -3.801 | -1.443 | 0.179  |
| C2           | -2.733 | 2.08   | 1.227  | C2           | -5.027 | 0.196  | -1.098 |
| C3           | 0.613  | 0.95   | -1.201 | C3           | 1.329  | -1.766 | 0.482  |
| C4           | 1.828  | 1.584  | -0.965 | C4           | 2.687  | -1.936 | 0.731  |
| C5           | -4.234 | 2.081  | -1.122 | C5           | -4.859 | -2.335 | 0.055  |
| C6           | -3.469 | 3.205  | 0.879  | C6           | -6.087 | -0.693 | -1.227 |
| C7           | 1.648  | -1.181 | -0.804 | C7           | 1.831  | 0.075  | -0.976 |
| C8           | -2.722 | 0.926  | 0.413  | C8           | -3.853 | -0.153 | -0.395 |
| C9           | 2.885  | -0.573 | -0.564 | C9           | 3.203  | -0.071 | -0.745 |
| C10          | 0.499  | -0.446 | -1.115 | C10          | 0.876  | -0.753 | -0.377 |
| C11          | 2.961  | 0.827  | -0.642 | C11          | 3.623  | -1.091 | 0.123  |
| C12          | -4.226 | 3.214  | -0.3   | C12          | -6.01  | -1.967 | -0.651 |
| C13          | -1.939 | -0.245 | 0.807  | C13          | -2.753 | 0.808  | -0.291 |
| C14          | -1.34  | -0.505 | 1.992  | C14          | -2.749 | 2.121  | -0.629 |

|     |        |        |        |     |        |        |        |
|-----|--------|--------|--------|-----|--------|--------|--------|
| C15 | -0.662 | -1.802 | 1.957  | C15 | -1.427 | 2.71   | -0.422 |
| C16 | -2.931 | -2.273 | -0.342 | C16 | -1.311 | 0.154  | 1.694  |
| C17 | 4.122  | -1.382 | -0.234 | C17 | 4.224  | 0.836  | -1.399 |
| C18 | 5.399  | -0.548 | -0.411 | C18 | 5.574  | 0.765  | -0.674 |
| C19 | -1.636 | -1.451 | -0.09  | C19 | -1.32  | 0.501  | 0.187  |
| C20 | 5.228  | 0.849  | 0.23   | C20 | 5.966  | -0.707 | -0.4   |
| C21 | 6.446  | 1.736  | -0.016 | C21 | 7.255  | -0.806 | 0.412  |
| C22 | 4.902  | 0.776  | 1.726  | C22 | 6.069  | -1.534 | -1.687 |
| C23 | -4.484 | -3.045 | -1.942 | C23 | -1.433 | 1.018  | 3.881  |
| C24 | -0.823 | -1.139 | -1.371 | C24 | -0.601 | -0.57  | -0.669 |
| O1  | -0.043 | -2.325 | 2.861  | O1  | -1.102 | 3.861  | -0.634 |
| O2  | -3.543 | -2.817 | 0.548  | O2  | -1.294 | -0.982 | 2.123  |
| O3  | 4.135  | 1.521  | -0.469 | O3  | 4.94   | -1.289 | 0.461  |
| O4  | -0.827 | -2.342 | 0.725  | O4  | -0.592 | 1.745  | 0.033  |
| O5  | -4.968 | 4.285  | -0.696 | O5  | -7.015 | -2.882 | -0.741 |
| O6  | -1.296 | 0.223  | 3.126  | O6  | -3.738 | 2.902  | -1.112 |
| O7  | 5.753  | -0.435 | -1.79  | O7  | 5.55   | 1.522  | 0.536  |
| O8  | -3.281 | -2.305 | -1.635 | O8  | -1.377 | 1.246  | 2.456  |
| H1  | -3.535 | 0.097  | -1.422 | H1  | -2.935 | -1.753 | 0.75   |
| H2  | -2.153 | 2.096  | 2.142  | H2  | -5.109 | 1.175  | -1.554 |
| H3  | -0.258 | 1.549  | -1.454 | H3  | 0.611  | -2.423 | 0.963  |
| H4  | 1.922  | 2.663  | -1.03  | H4  | 3.043  | -2.719 | 1.393  |

|              |        |        |        |              |        |        |        |
|--------------|--------|--------|--------|--------------|--------|--------|--------|
| H5           | -4.826 | 2.092  | -2.032 | H5           | -4.807 | -3.322 | 0.505  |
| H6           | -3.457 | 4.081  | 1.523  | H6           | -6.977 | -0.398 | -1.779 |
| H7           | 1.586  | -2.266 | -0.75  | H7           | 1.502  | 0.87   | -1.643 |
| H8           | 4.066  | -1.758 | 0.796  | H8           | 4.356  | 0.563  | -2.455 |
| H9           | 4.191  | -2.262 | -0.882 | H9           | 3.878  | 1.876  | -1.388 |
| H10          | 6.244  | -1.057 | 0.062  | H10          | 6.352  | 1.23   | -1.287 |
| H11          | 6.249  | 2.752  | 0.342  | H11          | 7.446  | -1.849 | 0.684  |
| H12          | 6.69   | 1.774  | -1.08  | H12          | 7.186  | -0.207 | 1.323  |
| H13          | 7.313  | 1.34   | 0.524  | H13          | 8.101  | -0.442 | -0.18  |
| H14          | 4.842  | 1.787  | 2.141  | H14          | 6.409  | -2.547 | -1.45  |
| H15          | 5.687  | 0.231  | 2.262  | H15          | 6.792  | -1.083 | -2.377 |
| H16          | 3.948  | 0.276  | 1.915  | H16          | 5.108  | -1.612 | -2.202 |
| H17          | -4.604 | -2.966 | -3.021 | H17          | -1.475 | 2.01   | 4.329  |
| H18          | -5.338 | -2.605 | -1.423 | H18          | -0.542 | 0.481  | 4.212  |
| H19          | -4.368 | -4.088 | -1.639 | H19          | -2.325 | 0.44   | 4.135  |
| H20          | -1.444 | -0.528 | -2.03  | H20          | -0.741 | -0.261 | -1.711 |
| H21          | -0.66  | -2.091 | -1.886 | H21          | -1.132 | -1.516 | -0.544 |
| H22          | -4.882 | 4.997  | -0.041 | H22          | -7.752 | -2.504 | -1.249 |
| H23          | -0.779 | -0.3   | 3.771  | H23          | -3.351 | 3.793  | -1.23  |
| H24          | 5.1    | 0.155  | -2.205 | H24          | 4.954  | 1.062  | 1.151  |
| <b>OME17</b> |        |        |        | <b>OME11</b> |        |        |        |
| C1           | -3.321 | -1.69  | 0.269  | C1           | -2.761 | 1.616  | -0.716 |

|     |        |        |        |     |        |        |        |
|-----|--------|--------|--------|-----|--------|--------|--------|
| C2  | -5.081 | -0.393 | -0.752 | C2  | -1.755 | 2.199  | 1.397  |
| C3  | 1.575  | 1.16   | -1.529 | C3  | 1.143  | -2.361 | -0.81  |
| C4  | 2.958  | 1.278  | -1.466 | C4  | 2.494  | -2.269 | -0.494 |
| C5  | -4.138 | -2.813 | 0.258  | C5  | -2.981 | 2.96   | -0.988 |
| C6  | -5.902 | -1.514 | -0.767 | C6  | -1.97  | 3.545  | 1.13   |
| C7  | 1.69   | -0.865 | -0.243 | C7  | 1.032  | 0.03   | -1.021 |
| C8  | -3.766 | -0.449 | -0.237 | C8  | -2.141 | 1.196  | 0.481  |
| C9  | 3.085  | -0.775 | -0.165 | C9  | 2.389  | 0.155  | -0.703 |
| C10 | 0.914  | 0.087  | -0.91  | C10 | 0.387  | -1.209 | -1.079 |
| C11 | 3.714  | 0.316  | -0.785 | C11 | 3.117  | -1.016 | -0.44  |
| C12 | -5.435 | -2.734 | -0.262 | C12 | -2.586 | 3.936  | -0.066 |
| C13 | -2.927 | 0.751  | -0.251 | C13 | -1.9   | -0.213 | 0.789  |
| C14 | -3.29  | 2.027  | -0.529 | C14 | -1.529 | -0.773 | 1.964  |
| C15 | -2.132 | 2.92   | -0.491 | C15 | -1.399 | -2.225 | 1.83   |
| C16 | -1.084 | 0.454  | 1.473  | C16 | -3.521 | -1.609 | -0.565 |
| C17 | 3.913  | -1.819 | 0.555  | C17 | 3.074  | 1.505  | -0.636 |
| C18 | 5.389  | -1.736 | 0.145  | C18 | 4.411  | 1.414  | 0.114  |
| C19 | -1.407 | 0.799  | 0      | C19 | -2.028 | -1.373 | -0.206 |
| C20 | 5.875  | -0.267 | 0.162  | C20 | 5.224  | 0.193  | -0.375 |
| C21 | 7.313  | -0.142 | -0.336 | C21 | 6.516  | 0.019  | 0.42   |
| C22 | 5.719  | 0.388  | 1.54   | C22 | 5.515  | 0.242  | -1.879 |
| C23 | -1.071 | 1.248  | 3.689  | C23 | -5.159 | -1.58  | -2.263 |

|     |        |        |        |     |        |        |        |
|-----|--------|--------|--------|-----|--------|--------|--------|
| C24 | -0.593 | -0.057 | -0.999 | C24 | -1.083 | -1.307 | -1.431 |
| O1  | -2.128 | 4.117  | -0.697 | O1  | -1.092 | -3.013 | 2.701  |
| O2  | -0.729 | -0.647 | 1.844  | O2  | -4.344 | -1.951 | 0.253  |
| O3  | 5.079  | 0.473  | -0.814 | O3  | 4.443  | -1.005 | -0.075 |
| O4  | -1.031 | 2.185  | -0.204 | O4  | -1.671 | -2.565 | 0.546  |
| O5  | -6.191 | -3.867 | -0.249 | O5  | -2.824 | 5.239  | -0.385 |
| O6  | -4.498 | 2.548  | -0.829 | O6  | -1.286 | -0.205 | 3.162  |
| O7  | 5.602  | -2.328 | -1.137 | O7  | 4.207  | 1.36   | 1.526  |
| O8  | -1.293 | 1.491  | 2.283  | O8  | -3.783 | -1.391 | -1.861 |
| H1  | -2.331 | -1.782 | 0.698  | H1  | -3.094 | 0.888  | -1.446 |
| H2  | -5.462 | 0.538  | -1.151 | H2  | -1.276 | 1.919  | 2.327  |
| H3  | 1.001  | 1.912  | -2.063 | H3  | 0.67   | -3.338 | -0.851 |
| H4  | 3.475  | 2.105  | -1.944 | H4  | 3.086  | -3.155 | -0.288 |
| H5  | -3.785 | -3.76  | 0.654  | H5  | -3.463 | 3.269  | -1.91  |
| H6  | -6.908 | -1.443 | -1.174 | H6  | -1.658 | 4.296  | 1.853  |
| H7  | 1.199  | -1.709 | 0.235  | H7  | 0.466  | 0.937  | -1.225 |
| H8  | 3.823  | -1.694 | 1.643  | H8  | 3.242  | 1.898  | -1.647 |
| H9  | 3.546  | -2.826 | 0.328  | H9  | 2.437  | 2.233  | -0.121 |
| H10 | 6.002  | -2.321 | 0.837  | H10 | 4.996  | 2.323  | -0.058 |
| H11 | 7.589  | 0.914  | -0.42  | H11 | 7.008  | -0.916 | 0.136  |
| H12 | 7.431  | -0.621 | -1.31  | H12 | 6.313  | 0.003  | 1.493  |
| H13 | 7.997  | -0.623 | 0.371  | H13 | 7.2    | 0.848  | 0.209  |

|              |        |        |        |     |        |        |        |
|--------------|--------|--------|--------|-----|--------|--------|--------|
| H14          | 6.133  | 1.401  | 1.515  | H14 | 6.143  | -0.608 | -2.162 |
| H15          | 6.26   | -0.186 | 2.3    | H15 | 6.048  | 1.164  | -2.137 |
| H16          | 4.671  | 0.46   | 1.844  | H16 | 4.599  | 0.198  | -2.476 |
| H17          | -1.286 | 2.195  | 4.182  | H17 | -5.181 | -1.357 | -3.329 |
| H18          | -0.035 | 0.949  | 3.86   | H18 | -5.809 | -0.898 | -1.71  |
| H19          | -1.743 | 0.464  | 4.046  | H19 | -5.465 | -2.611 | -2.076 |
| H20          | -0.942 | 0.238  | -1.995 | H20 | -1.38  | -0.454 | -2.046 |
| H21          | -0.879 | -1.102 | -0.861 | H21 | -1.271 | -2.205 | -2.028 |
| H22          | -7.063 | -3.678 | -0.635 | H22 | -2.512 | 5.811  | 0.336  |
| H23          | -4.359 | 3.506  | -0.964 | H23 | -1.054 | -0.933 | 3.772  |
| H24          | 5.195  | -1.739 | -1.794 | H24 | 3.832  | 0.486  | 1.727  |
| <b>OME19</b> |        |        |        |     |        |        |        |
| C1           | -2.876 | 1.951  | 1.39   | O5  | -5.108 | 4.287  | -0.281 |
| C2           | -3.57  | 0.966  | -0.699 | O6  | -1.406 | -0.01  | 3.16   |
| C3           | 0.552  | 1.095  | -1.058 | O7  | 6.435  | -1.004 | 0.467  |
| C4           | 1.754  | 1.732  | -0.771 | O8  | -3.253 | -2.215 | -1.814 |
| C5           | -3.639 | 3.077  | 1.119  | H1  | -2.31  | 1.91   | 2.313  |
| C6           | -4.339 | 2.093  | -0.977 | H2  | -3.577 | 0.158  | -1.42  |
| C7           | 1.63   | -1.038 | -0.831 | H3  | -0.331 | 1.695  | -1.261 |
| C8           | -2.817 | 0.863  | 0.488  | H4  | 1.824  | 2.816  | -0.746 |
| C9           | 2.853  | -0.425 | -0.537 | H5  | -3.672 | 3.907  | 1.818  |
| C10          | 0.468  | -0.305 | -1.094 | H6  | -4.913 | 2.143  | -1.899 |

|     |        |        |        |     |        |        |        |
|-----|--------|--------|--------|-----|--------|--------|--------|
| C11 | 2.905  | 0.978  | -0.51  | H7  | 1.589  | -2.125 | -0.849 |
| C12 | -4.378 | 3.157  | -0.069 | H8  | 3.859  | -2.1   | 0.369  |
| C13 | -2.006 | -0.312 | 0.802  | H9  | 4.536  | -1.619 | -1.182 |
| C14 | -1.415 | -0.647 | 1.972  | H10 | 4.824  | -0.161 | 1.48   |
| C15 | -0.699 | -1.919 | 1.847  | H11 | 5.928  | 1.86   | -2.139 |
| C16 | -2.923 | -2.271 | -0.515 | H12 | 5.019  | 0.351  | -2.316 |
| C17 | 4.102  | -1.228 | -0.252 | H13 | 6.706  | 0.303  | -1.769 |
| C18 | 5.158  | -0.37  | 0.451  | H14 | 6.306  | 2.895  | 0.083  |
| C19 | -1.657 | -1.436 | -0.181 | H15 | 7.277  | 1.476  | 0.543  |
| C20 | 5.324  | 0.996  | -0.249 | H16 | 5.929  | 2.005  | 1.573  |
| C21 | 5.77   | 0.866  | -1.71  | H17 | -4.535 | -2.807 | -3.268 |
| C22 | 6.27   | 1.9    | 0.538  | H18 | -5.303 | -2.593 | -1.658 |
| C23 | -4.428 | -2.966 | -2.196 | H19 | -4.284 | -4.025 | -1.972 |
| C24 | -0.835 | -1.003 | -1.421 | H20 | -1.463 | -0.355 | -2.038 |
| O1  | -0.076 | -2.493 | 2.717  | H21 | -0.646 | -1.907 | -2.009 |
| O2  | -3.533 | -2.898 | 0.32   | H22 | -5.574 | 4.216  | -1.131 |
| O3  | 4.039  | 1.68   | -0.204 | H23 | -0.879 | -0.565 | 3.769  |
| O4  | -0.834 | -2.366 | 0.575  | H24 | 6.337  | -1.844 | 0.943  |
